# Supplementary material for: Do Rainfall Shocks Prompt Commercial Input Purchases Amongst Smallholder Farmers in Diverse Regions and Environments in Malawi?
Source: MDPI journal article supplement (doi:10.3390/su142214904), 2022-11-11
Supplement: s1 [file s1]

## Supplementary Material

### Do Rainfall Shocks Prompt Commercial Input Purchases Amongst Smallholder Farmers in Diverse Regions and Environments in Malawi?

Clifton Makate and Marshall Makate

#### ✕ Descriptive statistics

Table S1: Descriptive statistics of explanatory variables by national sample and region

| Variables                                                | National<br>mean | Northern<br>mean | Central<br>mean | Southern<br>mean |
|----------------------------------------------------------|------------------|------------------|-----------------|------------------|
| <b><i>Climate variables and rainfall shocks</i></b>      |                  |                  |                 |                  |
| Growing season rainfall shock (1-year lag)               | 0.004            | -0.214           | -0.016          | 0.090            |
| Growing season rainfall shock (2-year lag)               | -0.139           | -0.011           | 0.033           | -0.305           |
| Historical mean rainfall (growing season) (mm)           | 944.987          | 1104.423         | 925.648         | 906.346          |
| Historical stdev rainfall (growing season)               | 152.455          | 152.681          | 133.004         | 166.380          |
| Historical temperature(max)(growing season)(deg)         | 28.194           | 26.793           | 27.252          | 29.334           |
| Historical stdev temperature(max)(growing season)        | 0.585            | 0.545            | 0.607           | 0.582            |
| <b><i>Household characteristics (other controls)</i></b> |                  |                  |                 |                  |
| Agricultural implements access index                     | 0.268            | 0.912            | 0.356           | -0.007           |
| Household wealth index                                   | -0.542           | -0.264           | -0.600          | -0.592           |
| Farm size(ha)                                            | 0.665            | 0.695            | 0.796           | 0.561            |
| Number of plots                                          | 1.488            | 1.552            | 1.663           | 1.341            |
| Family labour(weeks)                                     | 26.585           | 27.092           | 30.121          | 23.873           |
| Access to government extension(1=yes)                    | 0.280            | 0.323            | 0.267           | 0.275            |
| Distance to ADMARC(km)                                   | 8.650            | 11.564           | 7.883           | 8.242            |
| Received FISP coupon(1=yes)                              | 0.320            | 0.328            | 0.299           | 0.332            |
| Received fertilizer coupon(1=yes)                        | 0.318            | 0.326            | 0.296           | 0.330            |
| Received seed coupon(1=yes)                              | 0.147            | 0.203            | 0.092           | 0.168            |
| Age of household head (Years)                            | 44.167           | 44.972           | 43.672          | 44.258           |
| Household head attained at least JCE (1=yes)             | 0.330            | 0.298            | 0.312           | 0.354            |
| Male household head(1=yes)                               | 0.710            | 0.769            | 0.755           | 0.659            |
| Household Size                                           | 4.583            | 4.802            | 4.731           | 4.405            |
| Household dependency ratio (%)                           | 104.765          | 95.702           | 104.292         | 108.092          |
| Number of observations                                   | 25631            | 4123             | 9001            | 12507            |

Notes: Statistics are not weighted; Source: LSMS-ISA data for Malawi. Stdev=standard deviation; ADMARC=Agricultural Development and Marketing Cooperation. We present a longer version of this Table which show the descriptive statistics by region and survey year.

***Do rainfall shocks prompt commercial input purchase amongst smallholder farmers in diverse regions and environments in Malawi? Lessons for adaptation***

**✕ Full tables of main results shown in Manuscript reporting Marginal effects (ME)**

Table S2: The influence of rainfall shocks on input purchasing(general) in Malawi by region (Craggit Double hurdle models)

| VARIABLES                                    | <i>National</i>       |                       | <i>Northern</i>       |                       | <i>Central</i>        |                       | <i>Southern</i>       |                       |
|----------------------------------------------|-----------------------|-----------------------|-----------------------|-----------------------|-----------------------|-----------------------|-----------------------|-----------------------|
|                                              | Hurdle1               | Hurdle2               | Hurdle1               | Hurdle2               | Hurdle1               | Hurdle2               | Hurdle1               | Hurdle2               |
| <b><i>Climate risk variables</i></b>         | ME(se)                |
| Growing season drought shock(1-year lag)     | 0.059***<br>(0.0221)  | 0.078<br>(0.0645)     | 0.033<br>(0.0411)     | -0.018<br>(0.1200)    | 0.041<br>(0.0403)     | 0.200*<br>(0.1213)    | 0.120**<br>(0.0612)   | 0.662***<br>(0.2118)  |
| Growing season drought shock(2-year lag)     | 0.102***<br>(0.0216)  | 0.011<br>(0.0630)     | -0.018<br>(0.0598)    | -0.539**<br>(0.2167)  | 0.226**<br>(0.0902)   | 0.630**<br>(0.2798)   | 0.047<br>(0.0487)     | -0.164<br>(0.1379)    |
| Growing season flood shock(1-year lag)       | -0.155***<br>(0.0253) | 0.278***<br>(0.0630)  | -0.020<br>(0.0428)    | 0.494***<br>(0.1093)  | -0.286***<br>(0.0435) | -0.052<br>(0.1376)    | -0.280***<br>(0.0526) | 0.266**<br>(0.1308)   |
| Long-term season average rainfall(mm)        | 0.000**<br>(0.0001)   | 0.002***<br>(0.0004)  | 0.000<br>(0.0002)     | 0.001**<br>(0.0006)   | 0.000<br>(0.0003)     | 0.002**<br>(0.0007)   | 0.001**<br>(0.0002)   | 0.001**<br>(0.0007)   |
| Long-term season average temperature (deg)   | -0.014***<br>(0.0050) | -0.180***<br>(0.0134) | 0.004<br>(0.0141)     | -0.090***<br>(0.0346) | -0.030***<br>(0.0080) | -0.182***<br>(0.0226) | -0.009<br>(0.0064)    | -0.187***<br>(0.0187) |
| <b><i>Other control variables</i></b>        |                       |                       |                       |                       |                       |                       |                       |                       |
| Number of plots cultivated                   | 0.011*<br>(0.0058)    | 0.082***<br>(0.0166)  | -0.026**<br>(0.0133)  | 0.002<br>(0.0502)     | 0.014*<br>(0.0084)    | 0.061***<br>(0.0225)  | 0.028***<br>(0.0093)  | 0.124***<br>(0.0267)  |
| Log farm size(ha)                            | 0.157***<br>(0.0153)  | -0.992***<br>(0.0474) | 0.201***<br>(0.0352)  | -0.764***<br>(0.1052) | 0.183***<br>(0.0232)  | -0.754***<br>(0.0725) | 0.103***<br>(0.0233)  | -1.344***<br>(0.0745) |
| Household asset wealth index                 | 0.020***<br>(0.0042)  | 0.162***<br>(0.0129)  | 0.029***<br>(0.0066)  | 0.114***<br>(0.0186)  | 0.018***<br>(0.0084)  | 0.182***<br>(0.0190)  | 0.017***<br>(0.0060)  | 0.166***<br>(0.0217)  |
| Agricultural implement access score          | 0.031***<br>(0.0028)  | 0.151***<br>(0.0075)  | 0.023***<br>(0.0050)  | 0.106***<br>(0.0130)  | 0.043***<br>(0.0050)  | 0.152***<br>(0.0107)  | 0.023***<br>(0.0042)  | 0.173***<br>(0.0128)  |
| Log Distance to ADMARC(km)                   | -0.021**<br>(0.0084)  | -0.062***<br>(0.0215) | -0.029<br>(0.0184)    | -0.048<br>(0.0444)    | -0.009<br>(0.0141)    | -0.050<br>(0.0347)    | -0.025**<br>(0.0120)  | -0.081**<br>(0.0324)  |
| Received fertilizer coupon(1=yes)            | -0.162***<br>(0.0095) | -0.615***<br>(0.0347) | -0.205***<br>(0.0285) | -0.497***<br>(0.1195) | -0.139***<br>(0.0142) | -0.636***<br>(0.0508) | -0.179***<br>(0.0139) | -0.637***<br>(0.0508) |
| Received seed coupon(1=yes)                  | 0.018<br>(0.0111)     | -0.159***<br>(0.0452) | 0.061**<br>(0.0299)   | -0.094<br>(0.1361)    | -0.001<br>(0.0197)    | 0.008<br>(0.0817)     | 0.042***<br>(0.0155)  | -0.229***<br>(0.0608) |
| Age of household head(years)                 | -0.003***<br>(0.0002) | -0.008***<br>(0.0007) | -0.003***<br>(0.0005) | -0.006***<br>(0.0021) | -0.004***<br>(0.0003) | -0.007***<br>(0.0012) | -0.003***<br>(0.0003) | -0.008***<br>(0.0010) |
| Household head attained at least JCE (1=yes) | -0.001<br>(0.0063)    | 0.063***<br>(0.0217)  | 0.025<br>(0.0160)     | 0.191***<br>(0.0584)  | 0.007<br>(0.0101)     | 0.020<br>(0.0346)     | -0.011<br>(0.0090)    | 0.076**<br>(0.0313)   |
| Male household head(1=yes)                   | 0.055***<br>(0.0071)  | 0.205***<br>(0.0255)  | 0.040**<br>(0.0184)   | 0.151**<br>(0.0724)   | 0.054***<br>(0.0116)  | 0.275***<br>(0.0449)  | 0.056***<br>(0.0102)  | 0.174***<br>(0.0346)  |
| Household Size                               | 0.006***<br>(0.0018)  | 0.020***<br>(0.0057)  | 0.006<br>(0.0040)     | 0.001<br>(0.0144)     | -0.000<br>(0.0028)    | 0.013<br>(0.0092)     | 0.012***<br>(0.0025)  | 0.031***<br>(0.0084)  |
| Household dependency ratio(%)                | 0.000<br>(0.0000)     | -0.000***<br>(0.0001) | 0.000<br>(0.0001)     | -0.000<br>(0.0004)    | 0.000<br>(0.0001)     | -0.001***<br>(0.0002) | -0.000<br>(0.0001)    | -0.000**<br>(0.0002)  |
| Sigma constant                               |                       | 1.139***<br>(0.0078)  |                       | 1.094***<br>(0.0216)  |                       | 1.119***<br>(0.0126)  |                       | 1.153***<br>(0.0112)  |
| Survey year dummies                          | Yes                   |
| District fixed effects                       | Yes                   |
| <b><i>Observations</i></b>                   | <b>25631</b>          | <b>15058</b>          | <b>4123</b>           | <b>2019</b>           | <b>9001</b>           | <b>5484</b>           | <b>12502</b>          | <b>7555</b>           |

Notes: Cluster robust standard errors with clustering specified at the primary sampling unit(village) are in parenthesis. ME=Marginal Effects. Hurdle 1 is a probit regression for the probability of input purchase whilst Hurdle 2 is the model for intensity of purchase for purchasers (log value of purchased inputs (USD/ha), \*  $p < 0.10$ , \*\*  $p < 0.05$ , \*\*\*  $p < 0.01$ . Input purchasing is defined in general (fertilizer, agrochemicals, or seed).

# Do rainfall shocks prompt commercial input purchase amongst smallholder farmers in diverse regions and environments in Malawi? Lessons for adaptation

Table S3: The influence of rainfall shocks on Fertilizer purchasing in Malawi by region (Craggit Double hurdle models)

| VARIABLES                                    | <i>National</i>       |                       | <i>Northern</i>       |                       | <i>Central</i>        |                       | <i>Southern</i>       |                       |
|----------------------------------------------|-----------------------|-----------------------|-----------------------|-----------------------|-----------------------|-----------------------|-----------------------|-----------------------|
|                                              | Hurdle1               | Hurdle2               | Hurdle1               | Hurdle2               | Hurdle1               | Hurdle2               | Hurdle1               | Hurdle2               |
| <i>Climate risk variables</i>                | ME(se)                |
| Growing season drought shock(1-year lag)     | 0.032<br>(0.0198)     | 0.054<br>(0.0481)     | -0.037<br>(0.0364)    | 0.089<br>(0.0851)     | 0.051<br>(0.0395)     | 0.223**<br>(0.0948)   | 0.062<br>(0.0609)     | 0.636***<br>(0.1712)  |
| Growing season drought shock(2-year lag)     | 0.070***<br>(0.0197)  | 0.046<br>(0.0549)     | -0.113**<br>(0.0530)  | -0.142<br>(0.1739)    | 0.178**<br>(0.0843)   | 0.548**<br>(0.2172)   | -0.119***<br>(0.0423) | 0.146<br>(0.1419)     |
| Growing season flood shock(1-year lag)       | 0.013<br>(0.0170)     | 0.060<br>(0.0521)     | 0.051<br>(0.0378)     | 0.232**<br>(0.0924)   | 0.029<br>(0.0363)     | -0.234**<br>(0.1029)  | 0.006<br>(0.0343)     | 0.104<br>(0.1283)     |
| Long-term season average rainfall(mm)        | 0.000<br>(0.0001)     | 0.002***<br>(0.0003)  | 0.000<br>(0.0002)     | 0.002***<br>(0.0005)  | 0.000<br>(0.0002)     | 0.001**<br>(0.0006)   | 0.000<br>(0.0002)     | 0.001<br>(0.0007)     |
| Long-term season average temperature (deg)   | -0.051***<br>(0.0042) | -0.097***<br>(0.0102) | -0.020*<br>(0.0110)   | -0.065***<br>(0.0204) | -0.051***<br>(0.0077) | -0.094***<br>(0.0167) | -0.058***<br>(0.0050) | -0.101***<br>(0.0149) |
| <i>Other control variables</i>               |                       |                       |                       |                       |                       |                       |                       |                       |
| Number of plots cultivated                   | 0.049***<br>(0.0044)  | -0.013<br>(0.0142)    | 0.032***<br>(0.0109)  | -0.005<br>(0.0385)    | 0.059***<br>(0.0070)  | -0.031<br>(0.0187)    | 0.046***<br>(0.0065)  | 0.011<br>(0.0263)     |
| Log farm size(ha)                            | 0.199***<br>(0.0131)  | -1.116***<br>(0.0434) | 0.255***<br>(0.0318)  | -0.926***<br>(0.0941) | 0.243***<br>(0.0219)  | -0.982***<br>(0.0629) | 0.142***<br>(0.0186)  | -1.501***<br>(0.0720) |
| Household asset wealth index                 | 0.050***<br>(0.0047)  | 0.094***<br>(0.0088)  | 0.048***<br>(0.0072)  | 0.077***<br>(0.0125)  | 0.064***<br>(0.0125)  | 0.116***<br>(0.0135)  | 0.043***<br>(0.0061)  | 0.090***<br>(0.0136)  |
| Agricultural implement access score          | 0.040***<br>(0.0025)  | 0.103***<br>(0.0063)  | 0.027***<br>(0.0048)  | 0.073***<br>(0.0112)  | 0.049***<br>(0.0048)  | 0.115***<br>(0.0089)  | 0.041***<br>(0.0035)  | 0.097***<br>(0.0115)  |
| Log Distance to ADMARC(km)                   | -0.033***<br>(0.0067) | -0.012<br>(0.0182)    | -0.033**<br>(0.0138)  | 0.052<br>(0.0354)     | -0.037***<br>(0.0117) | -0.032<br>(0.0252)    | -0.027***<br>(0.0093) | -0.031<br>(0.0339)    |
| Received fertilizer coupon(1=yes)            | -0.227***<br>(0.0085) | -0.272***<br>(0.0328) | -0.220***<br>(0.0244) | -0.193**<br>(0.0956)  | -0.258***<br>(0.0139) | -0.228***<br>(0.0414) | -0.214***<br>(0.0120) | -0.350***<br>(0.0596) |
| Received seed coupon(1=yes)                  | -0.017<br>(0.0106)    | 0.017<br>(0.0420)     | -0.003<br>(0.0260)    | -0.002<br>(0.1143)    | -0.012<br>(0.0199)    | 0.012<br>(0.0634)     | -0.017<br>(0.0143)    | 0.085<br>(0.0664)     |
| Age of household head(years)                 | -0.003***<br>(0.0002) | -0.003***<br>(0.0007) | -0.004***<br>(0.0005) | -0.002*<br>(0.0014)   | -0.004***<br>(0.0003) | -0.002**<br>(0.0011)  | -0.003***<br>(0.0003) | -0.002<br>(0.0011)    |
| Household head attained at least JCE (1=yes) | 0.006<br>(0.0059)     | 0.080***<br>(0.0201)  | 0.042***<br>(0.0152)  | 0.159***<br>(0.0426)  | 0.001<br>(0.0103)     | 0.052<br>(0.0319)     | 0.003<br>(0.0081)     | 0.075**<br>(0.0317)   |
| Male household head(1=yes)                   | 0.048***<br>(0.0068)  | 0.114***<br>(0.0247)  | 0.019<br>(0.0177)     | 0.157***<br>(0.0601)  | 0.058***<br>(0.0130)  | 0.158***<br>(0.0407)  | 0.048***<br>(0.0085)  | 0.071**<br>(0.0359)   |
| Household Size                               | 0.006***<br>(0.0016)  | 0.005<br>(0.0053)     | 0.007*<br>(0.0039)    | 0.002<br>(0.0109)     | 0.006**<br>(0.0029)   | 0.008<br>(0.0082)     | 0.006***<br>(0.0021)  | 0.004<br>(0.0088)     |
| Household dependency ratio(%)                | -0.000***<br>(0.0000) | -0.000***<br>(0.0001) | -0.000<br>(0.0001)    | -0.000<br>(0.0003)    | -0.000*<br>(0.0001)   | -0.001***<br>(0.0002) | -0.000<br>(0.0000)    | -0.000<br>(0.0002)    |
| Sigma constant                               |                       | 0.821***<br>(0.0079)  |                       | 0.751***<br>(0.0167)  |                       | 0.832***<br>(0.0122)  |                       | 0.817***<br>(0.0124)  |
| Survey year dummies                          | Yes                   |
| District fixed effects                       | Yes                   |
| <i>Observations</i>                          | 25631                 | 8796                  | 4123                  | 1508                  | 9001                  | 3923                  | 12507                 | 3365                  |

Notes: Cluster robust standard errors with clustering specified at the primary sampling unit(village) are in parenthesis. ME=Marginal Effects. Hurdle 1 is a probit regression for the probability of purchasing fertilizer whilst Hurdle 2 is the model for intensity of purchase for purchasers (log value of purchased fertilizer (USD/ha), \* p < 0.10, \*\* p < 0.05, \*\*\* p < 0.01.

# Do rainfall shocks prompt commercial input purchase amongst smallholder farmers in diverse regions and environments in Malawi? Lessons for adaptation

Table S4: The influence of rainfall shocks on use of purchased agrochemicals in Malawi by region (Craggit Double hurdle models)

| VARIABLES                                    | <i>National</i>       |                       | <i>Northern</i>       |                       | <i>Central</i>        |                       | <i>Southern</i>       |                       |
|----------------------------------------------|-----------------------|-----------------------|-----------------------|-----------------------|-----------------------|-----------------------|-----------------------|-----------------------|
|                                              | Hurdle1               | Hurdle2               | Hurdle1               | Hurdle2               | Hurdle1               | Hurdle2               | Hurdle1               | Hurdle2               |
| <i>Climate risk variables</i>                | ME(se)                |
| Growing season drought shock(1-year lag)     | 0.039***<br>(0.0084)  | 0.115<br>(0.1274)     | 0.045***<br>(0.0145)  | 0.254<br>(0.2301)     | 0.024*<br>(0.0141)    | -0.549<br>(0.5205)    | 0.069***<br>(0.0220)  | -0.154<br>(0.2598)    |
| Growing season drought shock(2-year lag)     | 0.011*<br>(0.0067)    | -0.087<br>(0.1194)    | 0.010<br>(0.0211)     | 0.068<br>(0.4118)     | 0.000<br>(0.0333)     | -0.950<br>(0.7597)    | 0.050***<br>(0.0148)  | -0.460*<br>(0.2549)   |
| Growing season flood shock(1-year lag)       | -0.022**<br>(0.0086)  | -0.049<br>(0.1349)    | -0.012<br>(0.0165)    | 0.149<br>(0.1864)     | 0.007<br>(0.0176)     | 0.198<br>(0.4681)     | -0.044**<br>(0.0175)  | 0.020<br>(0.2488)     |
| Long-term season average rainfall(mm)        | 0.000**<br>(0.0000)   | 0.001<br>(0.0008)     | 0.000<br>(0.0001)     | -0.000<br>(0.0009)    | -0.000<br>(0.0001)    | 0.004*<br>(0.0022)    | 0.000***<br>(0.0001)  | -0.001<br>(0.0016)    |
| Long-term season average temperature (deg)   | 0.005***<br>(0.0018)  | -0.020<br>(0.0266)    | 0.011**<br>(0.0046)   | 0.049<br>(0.0542)     | -0.000<br>(0.0030)    | -0.068<br>(0.0468)    | 0.008***<br>(0.0026)  | -0.023<br>(0.0408)    |
| <i>Other control variables</i>               |                       |                       |                       |                       |                       |                       |                       |                       |
| Number of plots cultivated                   | 0.010***<br>(0.0015)  | -0.006<br>(0.0348)    | 0.006*<br>(0.0035)    | -0.052<br>(0.0870)    | 0.004*<br>(0.0022)    | -0.039<br>(0.0560)    | 0.018***<br>(0.0025)  | 0.024<br>(0.0492)     |
| Log farm size(ha)                            | 0.043***<br>(0.0047)  | -1.237***<br>(0.1174) | 0.037***<br>(0.0116)  | -1.397***<br>(0.2300) | 0.044***<br>(0.0070)  | -0.950***<br>(0.2077) | 0.041***<br>(0.0072)  | -1.366***<br>(0.1575) |
| Household asset wealth index                 | 0.001<br>(0.0007)     | 0.021<br>(0.0202)     | 0.002*<br>(0.0013)    | 0.009<br>(0.0335)     | 0.002<br>(0.0013)     | 0.019<br>(0.0408)     | -0.001<br>(0.0014)    | 0.035<br>(0.0296)     |
| Agricultural implement access score          | 0.006***<br>(0.0007)  | 0.070***<br>(0.0141)  | 0.006***<br>(0.0012)  | 0.027<br>(0.0332)     | 0.006***<br>(0.0010)  | 0.071***<br>(0.0202)  | 0.007***<br>(0.0013)  | 0.067***<br>(0.0211)  |
| Log Distance to ADMARC(km)                   | -0.005*<br>(0.0026)   | 0.121***<br>(0.0416)  | -0.008<br>(0.0048)    | -0.111<br>(0.1165)    | -0.008**<br>(0.0041)  | 0.185**<br>(0.0802)   | -0.001<br>(0.0039)    | 0.134**<br>(0.0532)   |
| Received fertilizer coupon(1=yes)            | -0.011**<br>(0.0043)  | -0.166*<br>(0.0975)   | -0.011<br>(0.0090)    | -0.465*<br>(0.2394)   | -0.010<br>(0.0070)    | -0.340*<br>(0.1802)   | -0.008<br>(0.0065)    | -0.007<br>(0.1257)    |
| Received seed coupon(1=yes)                  | 0.013***<br>(0.0048)  | 0.039<br>(0.1095)     | 0.014<br>(0.0106)     | 0.459*<br>(0.2557)    | 0.015*<br>(0.0082)    | 0.194<br>(0.2014)     | 0.010<br>(0.0072)     | -0.165<br>(0.1419)    |
| Age of household head(years)                 | -0.001***<br>(0.0001) | -0.004**<br>(0.0020)  | -0.001***<br>(0.0002) | -0.007<br>(0.0046)    | -0.001***<br>(0.0001) | 0.002<br>(0.0040)     | -0.001***<br>(0.0001) | -0.004<br>(0.0024)    |
| Household head attained at least JCE (1=yes) | -0.003<br>(0.0025)    | 0.064<br>(0.0546)     | 0.001<br>(0.0067)     | 0.133<br>(0.1206)     | -0.007<br>(0.0041)    | 0.149<br>(0.1046)     | -0.003<br>(0.0035)    | 0.007<br>(0.0684)     |
| Male household head(1=yes)                   | 0.011***<br>(0.0029)  | 0.141**<br>(0.0662)   | 0.003<br>(0.0067)     | 0.442**<br>(0.1904)   | 0.016***<br>(0.0059)  | 0.147<br>(0.1488)     | 0.011***<br>(0.0040)  | 0.034<br>(0.0774)     |
| Household Size                               | -0.000<br>(0.0006)    | 0.014<br>(0.0157)     | 0.000<br>(0.0016)     | 0.049<br>(0.0354)     | -0.000<br>(0.0010)    | -0.004<br>(0.0281)    | -0.000<br>(0.0009)    | 0.021<br>(0.0227)     |
| Household dependency ratio(%)                | -0.000<br>(0.0000)    | -0.000<br>(0.0004)    | -0.000<br>(0.0000)    | -0.000<br>(0.0007)    | 0.000<br>(0.0000)     | -0.001<br>(0.0008)    | -0.000<br>(0.0000)    | -0.000<br>(0.0006)    |
| Sigma constant                               |                       | 0.698***<br>(0.0168)  |                       | 0.633***<br>(0.0356)  |                       | 0.747***<br>(0.0323)  |                       | 0.654***<br>(0.0215)  |
| Survey year dummies                          | Yes                   |
| District fixed effects                       | Yes                   |
| <i>Observations</i>                          | 25631                 | 906                   | 4123                  | 138                   | 9001                  | 290                   | 12502                 | 478                   |

Notes: Cluster robust standard errors with clustering specified at the primary sampling unit(village) are in parenthesis. ME=Marginal Effects.Hurdle 1 is a probit regression for the probability of using purchased agrochemicals while Hurdle 2 is the model for intensity of agrochemical purchase for purchasers (log value of purchased agrochemicals (USD/ha), \*  $p < 0.10$ , \*\*  $p < 0.05$ , \*\*\*  $p < 0.01$ ).



# Do rainfall shocks prompt commercial input purchase amongst smallholder farmers in diverse regions and environments in Malawi? Lessons for adaptation

Table S5: The influence of rainfall shocks on use of purchased seeds in Malawi by region (Craggit Double hurdle models)

| VARIABLES                                    | <i>National</i>       |                       | <i>Northern</i>       |                       | <i>Central</i>        |                       | <i>Southern</i>       |                       |
|----------------------------------------------|-----------------------|-----------------------|-----------------------|-----------------------|-----------------------|-----------------------|-----------------------|-----------------------|
|                                              | Hurdle1               | Hurdle2               | Hurdle1               | Hurdle2               | Hurdle1               | Hurdle2               | Hurdle1               | Hurdle2               |
| <i>Climate risk variables</i>                | ME(se)                |
| Growing season drought shock(1-year lag)     | 0.069***<br>(0.0200)  | -0.025<br>(0.0475)    | 0.080**<br>(0.0372)   | 0.065<br>(0.0854)     | 0.012<br>(0.0378)     | -0.370***<br>(0.0922) | 0.030<br>(0.0560)     | 0.377***<br>(0.1225)  |
| Growing season drought shock(2-year lag)     | 0.089***<br>(0.0197)  | 0.031<br>(0.0432)     | 0.090*<br>(0.0536)    | 0.257*<br>(0.1339)    | 0.092<br>(0.0805)     | -0.184<br>(0.1893)    | 0.141***<br>(0.0425)  | 0.185**<br>(0.0903)   |
| Growing season flood shock(1-year lag)       | -0.102***<br>(0.0184) | 0.080<br>(0.0520)     | 0.017<br>(0.0377)     | 0.255**<br>(0.1087)   | -0.066*<br>(0.0383)   | -0.010<br>(0.1005)    | -0.246***<br>(0.0377) | -0.001<br>(0.1127)    |
| Long-term season average rainfall(mm)        | 0.000<br>(0.0001)     | 0.001***<br>(0.0003)  | -0.000<br>(0.0002)    | 0.000<br>(0.0005)     | 0.000<br>(0.0002)     | 0.002**<br>(0.0006)   | 0.001**<br>(0.0002)   | 0.001***<br>(0.0005)  |
| Long-term season average temperature (deg)   | 0.003<br>(0.0039)     | 0.012<br>(0.0088)     | -0.003<br>(0.0111)    | 0.006<br>(0.0243)     | -0.006<br>(0.0060)    | -0.022<br>(0.0156)    | 0.012**<br>(0.0052)   | 0.031***<br>(0.0114)  |
| <i>Other control variables</i>               |                       |                       |                       |                       |                       |                       |                       |                       |
| Number of plots cultivated                   | 0.049***<br>(0.0048)  | -0.001<br>(0.0143)    | 0.048***<br>(0.0106)  | -0.005<br>(0.0385)    | 0.043***<br>(0.0073)  | -0.005<br>(0.0212)    | 0.058***<br>(0.0083)  | 0.010<br>(0.0222)     |
| Log farm size(ha)                            | 0.041***<br>(0.0147)  | -1.382***<br>(0.0403) | 0.046<br>(0.0337)     | -1.559***<br>(0.1189) | 0.048***<br>(0.0226)  | -1.311***<br>(0.0647) | 0.020<br>(0.0234)     | -1.403***<br>(0.0565) |
| Household asset wealth index                 | 0.017***<br>(0.0031)  | 0.033***<br>(0.0062)  | 0.030***<br>(0.0061)  | 0.022<br>(0.0163)     | 0.026***<br>(0.0063)  | 0.069***<br>(0.0108)  | 0.007*<br>(0.0040)    | 0.020***<br>(0.0068)  |
| Agricultural implement access score          | 0.016***<br>(0.0024)  | 0.010*<br>(0.0060)    | 0.018***<br>(0.0046)  | 0.009<br>(0.0138)     | 0.023***<br>(0.0041)  | 0.001<br>(0.0098)     | 0.002<br>(0.0039)     | 0.016*<br>(0.0091)    |
| Log Distance to ADMARC(km)                   | -0.008<br>(0.0067)    | 0.006<br>(0.0161)     | -0.007<br>(0.0156)    | -0.004<br>(0.0474)    | -0.021**<br>(0.0104)  | 0.022<br>(0.0269)     | 0.001<br>(0.0100)     | -0.006<br>(0.0218)    |
| Received fertilizer coupon(1=yes)            | -0.087***<br>(0.0099) | -0.088***<br>(0.0271) | -0.094***<br>(0.0265) | -0.154<br>(0.1080)    | -0.055***<br>(0.0150) | -0.065<br>(0.0418)    | -0.111***<br>(0.0149) | -0.093**<br>(0.0374)  |
| Received seed coupon(1=yes)                  | -0.008<br>(0.0120)    | -0.253***<br>(0.0354) | -0.047<br>(0.0302)    | -0.335***<br>(0.1249) | -0.028<br>(0.0211)    | -0.209***<br>(0.0681) | 0.031*<br>(0.0171)    | -0.227***<br>(0.0457) |
| Age of household head(years)                 | -0.003***<br>(0.0002) | -0.002***<br>(0.0006) | -0.003***<br>(0.0005) | -0.003<br>(0.0020)    | -0.004***<br>(0.0003) | -0.001<br>(0.0012)    | -0.003***<br>(0.0003) | -0.002***<br>(0.0008) |
| Household head attained at least JCE (1=yes) | 0.004<br>(0.0067)     | 0.014<br>(0.0172)     | 0.023<br>(0.0160)     | 0.070<br>(0.0537)     | 0.016<br>(0.0111)     | 0.020<br>(0.0320)     | -0.015<br>(0.0096)    | 0.003<br>(0.0216)     |
| Male household head(1=yes)                   | 0.048***<br>(0.0076)  | 0.039*<br>(0.0204)    | 0.053***<br>(0.0195)  | -0.061<br>(0.0572)    | 0.043***<br>(0.0130)  | -0.018<br>(0.0395)    | 0.053***<br>(0.0108)  | 0.074***<br>(0.0261)  |
| Household Size                               | 0.010***<br>(0.0018)  | 0.016***<br>(0.0048)  | 0.008*<br>(0.0041)    | 0.006<br>(0.0128)     | 0.008**<br>(0.0031)   | 0.005<br>(0.0086)     | 0.015***<br>(0.0026)  | 0.026***<br>(0.0064)  |
| Household dependency ratio(%)                | 0.000<br>(0.0000)     | -0.000<br>(0.0001)    | -0.000<br>(0.0001)    | -0.000<br>(0.0004)    | 0.000<br>(0.0001)     | 0.000<br>(0.0002)     | 0.000<br>(0.0001)     | 0.000<br>(0.0001)     |
| Sigma constant                               |                       | 0.831***<br>(0.0083)  |                       | 0.857***<br>(0.0255)  |                       | 0.861***<br>(0.0160)  |                       | 0.801***<br>(0.0101)  |
| Survey year dummies                          | Yes                   |
| District fixed effects                       | Yes                   |
| Observations                                 | 25631                 | 11171                 | 4123                  | 1309                  | 9001                  | 3680                  | 12507                 | 6182                  |

Notes: Cluster robust standard errors with clustering specified at the primary sampling unit(village) are in parenthesis. ME=Marginal Effects. Hurdle 1 is a probit regression for the probability of using purchased agrochemicals while Hurdle 2 is the model for intensity of purchased seeds for purchasers (log quantity of purchased seed(kg/ha), \*  $p < 0.10$ , \*\*  $p < 0.05$ , \*\*\*  $p < 0.01$ .

# Do rainfall shocks prompt commercial input purchase amongst smallholder farmers in diverse regions and environments in Malawi? Lessons for adaptation

Table S6: The influence of rainfall shocks on use of hired labor in Malawi by region (Craggit Double hurdle models)

| VARIABLES                                    | <i>National</i>       |                       | <i>Northern</i>       |                       | <i>Central</i>        |                       | <i>Southern</i>       |                       |
|----------------------------------------------|-----------------------|-----------------------|-----------------------|-----------------------|-----------------------|-----------------------|-----------------------|-----------------------|
|                                              | Hurdle1               | Hurdle2               | Hurdle1               | Hurdle2               | Hurdle1               | Hurdle2               | Hurdle1               | Hurdle2               |
| <b><i>Climate risk variables</i></b>         | ME(se)                |
| Growing season drought shock(1-year lag)     | -0.007<br>(0.0145)    | -0.063<br>(0.0791)    | 0.042<br>(0.0281)     | -0.183<br>(0.1349)    | -0.039<br>(0.0284)    | -0.112<br>(0.1557)    | -0.019<br>(0.0413)    | 0.095<br>(0.2328)     |
| Growing season drought shock(2-year lag)     | 0.031**<br>(0.0140)   | -0.105<br>(0.0750)    | 0.063<br>(0.0401)     | -0.358<br>(0.2266)    | -0.013<br>(0.0630)    | 0.289<br>(0.3195)     | 0.004<br>(0.0294)     | -0.522***<br>(0.1608) |
| Growing season flood shock(1-year lag)       | -0.018<br>(0.0149)    | 0.145*<br>(0.0758)    | -0.037<br>(0.0266)    | 0.109<br>(0.1687)     | -0.109***<br>(0.0286) | 0.041<br>(0.1615)     | -0.018<br>(0.0325)    | 0.190<br>(0.1600)     |
| Long-term season average rainfall(mm)        | 0.000***<br>(0.0001)  | 0.001*<br>(0.0004)    | 0.000<br>(0.0001)     | 0.000<br>(0.0005)     | 0.000***<br>(0.0002)  | 0.000<br>(0.0011)     | 0.000<br>(0.0002)     | 0.002*<br>(0.0008)    |
| Long-term season average temperature (deg)   | -0.008**<br>(0.0031)  | -0.027*<br>(0.0158)   | -0.004<br>(0.0084)    | 0.065*<br>(0.0367)    | -0.002<br>(0.0053)    | -0.051*<br>(0.0287)   | -0.014***<br>(0.0041) | -0.028<br>(0.0197)    |
| <b><i>Other control variables</i></b>        |                       |                       |                       |                       |                       |                       |                       |                       |
| Number of plots cultivated                   | 0.005<br>(0.0039)     | 0.033<br>(0.0226)     | -0.004<br>(0.0085)    | -0.060<br>(0.0583)    | 0.000<br>(0.0060)     | -0.011<br>(0.0337)    | 0.015**<br>(0.0066)   | 0.115***<br>(0.0321)  |
| Log farm size(ha)                            | 0.123***<br>(0.0123)  | -1.096***<br>(0.0698) | 0.159***<br>(0.0314)  | -0.741***<br>(0.1550) | 0.145***<br>(0.0202)  | -0.821***<br>(0.1065) | 0.082***<br>(0.0180)  | -1.549***<br>(0.1073) |
| Household asset wealth index                 | 0.056***<br>(0.0040)  | 0.075***<br>(0.0092)  | 0.043***<br>(0.0067)  | 0.090***<br>(0.0194)  | 0.061***<br>(0.0082)  | 0.091***<br>(0.0157)  | 0.057***<br>(0.0058)  | 0.058***<br>(0.0111)  |
| Agricultural implement access score          | 0.023***<br>(0.0018)  | 0.054***<br>(0.0088)  | 0.015***<br>(0.0033)  | 0.052***<br>(0.0182)  | 0.025***<br>(0.0030)  | 0.046***<br>(0.0126)  | 0.026***<br>(0.0029)  | 0.053***<br>(0.0146)  |
| Log Distance to ADMARC(km)                   | -0.007<br>(0.0052)    | -0.040<br>(0.0261)    | -0.013<br>(0.0121)    | -0.040<br>(0.0575)    | 0.002<br>(0.0093)     | -0.053<br>(0.0413)    | -0.008<br>(0.0071)    | -0.013<br>(0.0385)    |
| Received fertilizer coupon(1=yes)            | 0.011*<br>(0.0069)    | -0.145***<br>(0.0427) | -0.003<br>(0.0195)    | -0.012<br>(0.1222)    | -0.004<br>(0.0104)    | -0.196***<br>(0.0637) | 0.022**<br>(0.0103)   | -0.142**<br>(0.0611)  |
| Received seed coupon(1=yes)                  | 0.028***<br>(0.0080)  | 0.168***<br>(0.0488)  | 0.033*<br>(0.0198)    | 0.006<br>(0.1284)     | 0.039***<br>(0.0149)  | 0.119<br>(0.0868)     | 0.026**<br>(0.0110)   | 0.242***<br>(0.0671)  |
| Age of household head(years)                 | -0.001***<br>(0.0001) | -0.001<br>(0.0009)    | -0.000<br>(0.0004)    | -0.001<br>(0.0023)    | -0.001***<br>(0.0002) | -0.001<br>(0.0014)    | -0.000**<br>(0.0002)  | 0.000<br>(0.0013)     |
| Household head attained at least JCE (1=yes) | 0.001<br>(0.0048)     | 0.072**<br>(0.0301)   | 0.037***<br>(0.0126)  | 0.115<br>(0.0793)     | 0.001<br>(0.0084)     | 0.154***<br>(0.0481)  | -0.004<br>(0.0065)    | -0.024<br>(0.0437)    |
| Male household head(1=yes)                   | -0.001<br>(0.0055)    | 0.004<br>(0.0357)     | -0.040***<br>(0.0128) | 0.146*<br>(0.0836)    | 0.005<br>(0.0100)     | -0.034<br>(0.0641)    | 0.004<br>(0.0077)     | 0.022<br>(0.0490)     |
| Household Size                               | -0.017***<br>(0.0015) | -0.037***<br>(0.0090) | -0.018***<br>(0.0033) | -0.064***<br>(0.0198) | -0.017***<br>(0.0025) | -0.047***<br>(0.0148) | -0.016***<br>(0.0021) | -0.014<br>(0.0132)    |
| Household dependency ratio(%)                | 0.000***<br>(0.0000)  | 0.000<br>(0.0002)     | 0.000***<br>(0.0001)  | -0.000<br>(0.0006)    | 0.000<br>(0.0001)     | 0.000<br>(0.0003)     | 0.000**<br>(0.0000)   | -0.000<br>(0.0003)    |
| Log Family labor(weeks)                      | -0.012***<br>(0.0014) | 0.002<br>(0.0063)     | -0.002<br>(0.0027)    | 0.049***<br>(0.0102)  | -0.015***<br>(0.0027) | -0.004<br>(0.0123)    | -0.015***<br>(0.0020) | -0.024***<br>(0.0084) |
| Sigma constant                               |                       | 0.899***<br>(0.0096)  |                       | 0.883***<br>(0.0248)  |                       | 0.901***<br>(0.0169)  |                       | 0.872***<br>(0.0127)  |
| Survey year dummies                          | Yes                   |
| District fixed effects                       | Yes                   |
| <b><i>Observations</i></b>                   | 25631                 | 4433                  | 4123                  | 706                   | 9001                  | 1678                  | 12502                 | 2049                  |

Notes: Cluster robust standard errors with clustering specified at the primary sampling unit(village) are in parenthesis. ME=Marginal Effects. Hurdle 1 is a probit regression for the probability of using hired labor, while Hurdle 2 is the model for intensity of use (log days of hired labor(#/ha), \*  $p < 0.10$ , \*\*  $p < 0.05$ , \*\*\*  $p < 0.01$ .

# Do rainfall shocks prompt commercial input purchase amongst smallholder farmers in diverse regions and environments in Malawi? Lessons for adaptation

## ✕ Full tables of results reporting coefficients:

Table S7: The influence of rainfall shocks on input purchasing(general) in Malawi by region (Craggit Double hurdle models)

| VARIABLES                                    | <i>National</i>       |                       | <i>Northern</i>       |                       | <i>Central</i>        |                       | <i>Southern</i>       |                       |
|----------------------------------------------|-----------------------|-----------------------|-----------------------|-----------------------|-----------------------|-----------------------|-----------------------|-----------------------|
|                                              | Hurdle1               | Hurdle2               | Hurdle1               | Hurdle2               | Hurdle1               | Hurdle2               | Hurdle1               | Hurdle2               |
| <b><i>Climate risk variables</i></b>         | Coef(se)              |
| Growing season drought shock(1-year lag)     | 0.175***<br>(0.0652)  | 0.078<br>(0.0645)     | 0.098<br>(0.1204)     | -0.018<br>(0.1200)    | 0.124<br>(0.1233)     | 0.200*<br>(0.1213)    | 0.353**<br>(0.1796)   | 0.662***<br>(0.2118)  |
| Growing season drought shock(2-year lag)     | 0.300***<br>(0.0639)  | 0.011<br>(0.0630)     | -0.052<br>(0.1749)    | -0.539**<br>(0.2167)  | 0.690**<br>(0.2758)   | 0.630**<br>(0.2798)   | 0.137<br>(0.1429)     | -0.164<br>(0.1379)    |
| Growing season flood shock(1-year lag)       | -0.455***<br>(0.0751) | 0.278***<br>(0.0630)  | -0.058<br>(0.1251)    | 0.494***<br>(0.1093)  | -0.874***<br>(0.1356) | -0.052<br>(0.1376)    | -0.823***<br>(0.1571) | 0.266**<br>(0.1308)   |
| Long-term season average rainfall(mm)        | 0.001**<br>(0.0004)   | 0.002***<br>(0.0004)  | 0.0001<br>(0.0006)    | 0.001**<br>(0.0006)   | 0.001<br>(0.0009)     | 0.002**<br>(0.0007)   | 0.002**<br>(0.0007)   | 0.001**<br>(0.0007)   |
| Long-term season average temperature (deg)   | -0.042***<br>(0.0147) | -0.180***<br>(0.0134) | 0.013<br>(0.0413)     | -0.090***<br>(0.0346) | -0.090***<br>(0.0247) | -0.182***<br>(0.0226) | -0.027<br>(0.0187)    | -0.187***<br>(0.0187) |
| <b><i>Other control variables</i></b>        |                       |                       |                       |                       |                       |                       |                       |                       |
| Number of plots cultivated                   | 0.034*<br>(0.0171)    | 0.082***<br>(0.0166)  | -0.077*<br>(0.0392)   | 0.002<br>(0.0502)     | 0.044*<br>(0.0257)    | 0.061***<br>(0.0225)  | 0.082***<br>(0.0273)  | 0.124***<br>(0.0267)  |
| Log farm size(ha)                            | 0.464***<br>(0.0453)  | -0.992***<br>(0.0474) | 0.588***<br>(0.1034)  | -0.764***<br>(0.1052) | 0.559***<br>(0.0716)  | -0.754***<br>(0.0725) | 0.304***<br>(0.0686)  | -1.344***<br>(0.0745) |
| Household asset wealth index                 | 0.059***<br>(0.0123)  | 0.162***<br>(0.0129)  | 0.085***<br>(0.0192)  | 0.114***<br>(0.0186)  | 0.054**<br>(0.0256)   | 0.182***<br>(0.0190)  | 0.049***<br>(0.0175)  | 0.166***<br>(0.0217)  |
| Agricultural implement access score          | 0.091***<br>(0.0083)  | 0.151***<br>(0.0075)  | 0.067***<br>(0.0149)  | 0.106***<br>(0.0130)  | 0.133***<br>(0.0156)  | 0.152***<br>(0.0107)  | 0.066***<br>(0.0124)  | 0.173***<br>(0.0128)  |
| Log Distance to ADMARC(km)                   | -0.062**<br>(0.0247)  | -0.062***<br>(0.0215) | -0.084<br>(0.0538)    | -0.048<br>(0.0444)    | -0.028<br>(0.0431)    | -0.050<br>(0.0347)    | -0.074**<br>(0.0352)  | -0.081**<br>(0.0324)  |
| Received fertilizer coupon(1=yes)            | -0.476***<br>(0.0286) | -0.615***<br>(0.0347) | -0.599***<br>(0.0845) | -0.497***<br>(0.1195) | -0.426***<br>(0.0445) | -0.636***<br>(0.0508) | -0.524***<br>(0.0417) | -0.637***<br>(0.0508) |
| Received seed coupon(1=yes)                  | 0.054<br>(0.0328)     | -0.159***<br>(0.0452) | 0.179**<br>(0.0875)   | -0.094<br>(0.1361)    | -0.002<br>(0.0604)    | 0.008<br>(0.0817)     | 0.124***<br>(0.0456)  | -0.229***<br>(0.0608) |
| Age of household head(years)                 | -0.010***<br>(0.0006) | -0.008***<br>(0.0007) | -0.010***<br>(0.0015) | -0.006***<br>(0.0021) | -0.012***<br>(0.0009) | -0.007***<br>(0.0012) | -0.008***<br>(0.0008) | -0.008***<br>(0.0010) |
| Household head attained at least JCE (1=yes) | -0.003<br>(0.0185)    | 0.063***<br>(0.0217)  | 0.073<br>(0.0469)     | 0.191***<br>(0.0584)  | 0.020<br>(0.0310)     | 0.020<br>(0.0346)     | -0.034<br>(0.0263)    | 0.076**<br>(0.0313)   |
| Male household head(1=yes)                   | 0.161***<br>(0.0210)  | 0.205***<br>(0.0255)  | 0.118**<br>(0.0536)   | 0.151**<br>(0.0724)   | 0.167***<br>(0.0355)  | 0.275***<br>(0.0449)  | 0.164***<br>(0.0301)  | 0.174***<br>(0.0346)  |
| Household Size                               | 0.018***<br>(0.0052)  | 0.020***<br>(0.0057)  | 0.017<br>(0.0116)     | 0.001<br>(0.0144)     | -0.001<br>(0.0087)    | 0.013<br>(0.0092)     | 0.035***<br>(0.0075)  | 0.031***<br>(0.0084)  |
| Household dependency ratio(%)                | 0.0001<br>(0.0001)    | -<br>(0.0001)         | 0.0001<br>(0.0003)    | -0.0001<br>(0.0004)   | 0.0001<br>(0.0002)    | -0.001***<br>(0.0002) | -0.0001<br>(0.0002)   | -0.0001**<br>(0.0002) |
| Sigma constant                               |                       | 1.139***<br>(0.0078)  |                       | 1.094***<br>(0.0216)  |                       | 1.119***<br>(0.0126)  |                       | 1.153***<br>(0.0112)  |
| Survey year dummies                          | Yes                   |
| District fixed effects                       | Yes                   |
| <b><i>Observations</i></b>                   | <b>25631</b>          | <b>15058</b>          | <b>4123</b>           | <b>2019</b>           | <b>9001</b>           | <b>5484</b>           | <b>12502</b>          | <b>7555</b>           |

Notes: Cluster robust standard errors with clustering specified at the primary sampling unit(village) are in parenthesis. Hurdle 1 is a probit regression for the probability of input purchase whilst Hurdle 2 is the model for intensity of purchase for purchasers (log value of purchased inputs (USD/ha), \*  $p < 0.10$ , \*\*  $p < 0.05$ , \*\*\*  $p < 0.01$ . Input purchasing is defined in general (fertilizer, agrochemicals, or seed).

# Do rainfall shocks prompt commercial input purchase amongst smallholder farmers in diverse regions and environments in Malawi? Lessons for adaptation

Table S8: The influence of rainfall shocks on Fertilizer purchasing in Malawi by region (Craggit Double hurdle models)

| VARIABLES                                    | National              |                       | Northern              |                       | Central               |                       | Southern              |                       |
|----------------------------------------------|-----------------------|-----------------------|-----------------------|-----------------------|-----------------------|-----------------------|-----------------------|-----------------------|
|                                              | Hurdle1               | Hurdle2               | Hurdle1               | Hurdle2               | Hurdle1               | Hurdle2               | Hurdle1               | Hurdle2               |
| <b>Climate risk variables</b>                | Coef(se)              |
| Growing season drought shock(1-year lag)     | 0.107<br>(0.0665)     | 0.054<br>(0.0481)     | -0.119<br>(0.1168)    | 0.089<br>(0.0851)     | 0.156<br>(0.1220)     | 0.223**<br>(0.0948)   | 0.231<br>(0.2257)     | 0.636***<br>(0.1712)  |
| Growing season drought shock(2-year lag)     | 0.234***<br>(0.0661)  | 0.046<br>(0.0549)     | -0.361**<br>(0.1701)  | -0.142<br>(0.1739)    | 0.550**<br>(0.2610)   | 0.548**<br>(0.2172)   | -0.441***<br>(0.1560) | 0.146<br>(0.1419)     |
| Growing season flood shock(1-year lag)       | 0.045<br>(0.0569)     | 0.060<br>(0.0521)     | 0.162<br>(0.1215)     | 0.232**<br>(0.0924)   | 0.088<br>(0.1122)     | -0.234**<br>(0.1029)  | 0.023<br>(0.1273)     | 0.104<br>(0.1283)     |
| Long-term season average rainfall(mm)        | 0.001<br>(0.0004)     | 0.002***<br>(0.0003)  | 0.001<br>(0.0005)     | 0.002***<br>(0.0005)  | 0.001<br>(0.0007)     | 0.001**<br>(0.0006)   | 0.000<br>(0.0007)     | 0.001<br>(0.0007)     |
| Long-term season average temperature (deg)   | -0.171***<br>(0.0144) | -0.097***<br>(0.0102) | -0.066*<br>(0.0354)   | -0.065***<br>(0.0204) | -0.156***<br>(0.0242) | -0.094***<br>(0.0167) | -0.214***<br>(0.0190) | -0.101***<br>(0.0149) |
| <b>Other control variables</b>               |                       |                       |                       |                       |                       |                       |                       |                       |
| Number of plots cultivated                   | 0.164***<br>(0.0149)  | -0.013<br>(0.0142)    | 0.101***<br>(0.0352)  | -0.005<br>(0.0385)    | 0.183***<br>(0.0217)  | -0.031<br>(0.0187)    | 0.172***<br>(0.0244)  | 0.011<br>(0.0263)     |
| Log farm size(ha)                            | 0.668***<br>(0.0445)  | -1.116***<br>(0.0434) | 0.817***<br>(0.1029)  | -0.926***<br>(0.0941) | 0.750***<br>(0.0692)  | -0.982***<br>(0.0629) | 0.528***<br>(0.0695)  | -1.501***<br>(0.0720) |
| Household asset wealth index                 | 0.169***<br>(0.0162)  | 0.094***<br>(0.0088)  | 0.153***<br>(0.0238)  | 0.077***<br>(0.0125)  | 0.198***<br>(0.0392)  | 0.116***<br>(0.0135)  | 0.159***<br>(0.0232)  | 0.090***<br>(0.0136)  |
| Agricultural implement access score          | 0.135***<br>(0.0085)  | 0.103***<br>(0.0063)  | 0.086***<br>(0.0154)  | 0.073***<br>(0.0112)  | 0.151***<br>(0.0151)  | 0.115***<br>(0.0089)  | 0.153***<br>(0.0131)  | 0.097***<br>(0.0115)  |
| Log Distance to ADMARC(km)                   | -0.112***<br>(0.0224) | -0.012<br>(0.0182)    | -0.104**<br>(0.0444)  | 0.052<br>(0.0354)     | -0.113***<br>(0.0361) | -0.032<br>(0.0252)    | -0.101***<br>(0.0346) | -0.031<br>(0.0339)    |
| Received fertilizer coupon(1=yes)            | -0.762***<br>(0.0297) | -0.272***<br>(0.0328) | -0.703***<br>(0.0807) | -0.193**<br>(0.0956)  | -0.797***<br>(0.0455) | -0.228***<br>(0.0414) | -0.793***<br>(0.0461) | -0.350***<br>(0.0596) |
| Received seed coupon(1=yes)                  | -0.056<br>(0.0354)    | 0.017<br>(0.0420)     | -0.011<br>(0.0833)    | -0.002<br>(0.1143)    | -0.037<br>(0.0614)    | 0.012<br>(0.0634)     | -0.063<br>(0.0532)    | 0.085<br>(0.0664)     |
| Age of household head(years)                 | -0.011***<br>(0.0006) | -0.003***<br>(0.0007) | -0.012***<br>(0.0016) | -0.002*<br>(0.0014)   | -0.012***<br>(0.0010) | -0.002**<br>(0.0011)  | -0.009***<br>(0.0009) | -0.002<br>(0.0011)    |
| Household head attained at least JCE (1=yes) | 0.019<br>(0.0198)     | 0.080***<br>(0.0201)  | 0.134***<br>(0.0488)  | 0.159***<br>(0.0426)  | 0.003<br>(0.0317)     | 0.052<br>(0.0319)     | 0.012<br>(0.0299)     | 0.075**<br>(0.0317)   |
| Male household head(1=yes)                   | 0.162***<br>(0.0227)  | 0.114***<br>(0.0247)  | 0.060<br>(0.0567)     | 0.157***<br>(0.0601)  | 0.180***<br>(0.0402)  | 0.158***<br>(0.0407)  | 0.178***<br>(0.0318)  | 0.071**<br>(0.0359)   |
| Household Size                               | 0.021***<br>(0.0054)  | 0.005<br>(0.0053)     | 0.022*<br>(0.0126)    | 0.002<br>(0.0109)     | 0.020**<br>(0.0089)   | 0.008<br>(0.0082)     | 0.021***<br>(0.0079)  | 0.004<br>(0.0088)     |
| Household dependency ratio(%)                | -0.000***<br>(0.0001) | -0.000***<br>(0.0001) | -0.000<br>(0.0003)    | -0.000<br>(0.0003)    | -0.000*<br>(0.0002)   | -0.001***<br>(0.0002) | -0.000<br>(0.0002)    | -0.000<br>(0.0002)    |
| Sigma constant                               |                       | 0.821***<br>(0.0079)  |                       | 0.751***<br>(0.0167)  |                       | 0.832***<br>(0.0122)  |                       | 0.817***<br>(0.0124)  |
| Survey year dummies                          | Yes                   |
| District fixed effects                       | Yes                   |
| <b>Observations</b>                          | 25631                 | 8796                  | 4123                  | 1508                  | 9001                  | 3923                  | 12507                 | 3365                  |

Notes: Cluster robust standard errors with clustering specified at the primary sampling unit(village) are in parenthesis. Hurdle 1 is a probit regression for the probability of purchasing fertilizer whilst Hurdle 2 is the model for intensity of purchase for purchasers (log value of purchased fertilizer (USD/ha), \* p < 0.10, \*\* p < 0.05, \*\*\* p < 0.01.

# Do rainfall shocks prompt commercial input purchase amongst smallholder farmers in diverse regions and environments in Malawi? Lessons for adaptation

Table S9: The influence of rainfall shocks on use of purchased agrochemicals in Malawi by region (Craggit Double hurdle models)

| VARIABLES                                    | <i>National</i>       |                       | <i>Northern</i>       |                       | <i>Central</i>        |                       | <i>Southern</i>       |                       |
|----------------------------------------------|-----------------------|-----------------------|-----------------------|-----------------------|-----------------------|-----------------------|-----------------------|-----------------------|
|                                              | Hurdle1               | Hurdle2               | Hurdle1               | Hurdle2               | Hurdle1               | Hurdle2               | Hurdle1               | Hurdle2               |
| <i>Climate risk variables</i>                | Coef(se)              |
| Growing season drought shock(1-year lag)     | 0.615***<br>(0.1317)  | 0.115<br>(0.1274)     | 0.681***<br>(0.2106)  | 0.254<br>(0.2301)     | 0.391*<br>(0.2333)    | -0.549<br>(0.5205)    | 1.101***<br>(0.3481)  | -0.154<br>(0.2598)    |
| Growing season drought shock(2-year lag)     | 0.179*<br>(0.1059)    | -0.087<br>(0.1194)    | 0.152<br>(0.3189)     | 0.068<br>(0.4118)     | 0.003<br>(0.5511)     | -0.950<br>(0.7597)    | 0.798***<br>(0.2386)  | -0.460*<br>(0.2549)   |
| Growing season flood shock(1-year lag)       | -0.347**<br>(0.1362)  | -0.049<br>(0.1349)    | -0.177<br>(0.2503)    | 0.149<br>(0.1864)     | 0.115<br>(0.2909)     | 0.198<br>(0.4681)     | -0.706**<br>(0.2783)  | 0.020<br>(0.2488)     |
| Long-term season average rainfall(mm)        | 0.001**<br>(0.0007)   | 0.001<br>(0.0008)     | 0.001<br>(0.0009)     | -0.000<br>(0.0009)    | -0.001<br>(0.0016)    | 0.004*<br>(0.0022)    | 0.005***<br>(0.0012)  | -0.001<br>(0.0016)    |
| Long-term season average temperature (deg)   | 0.078***<br>(0.0286)  | -0.020<br>(0.0266)    | 0.174**<br>(0.0678)   | 0.049<br>(0.0542)     | -0.002<br>(0.0497)    | -0.068<br>(0.0468)    | 0.123***<br>(0.0423)  | -0.023<br>(0.0408)    |
| <i>Other control variables</i>               |                       |                       |                       |                       |                       |                       |                       |                       |
| Number of plots cultivated                   | 0.152***<br>(0.0225)  | -0.006<br>(0.0348)    | 0.090*<br>(0.0523)    | -0.052<br>(0.0870)    | 0.069*<br>(0.0357)    | -0.039<br>(0.0560)    | 0.291***<br>(0.0366)  | 0.024<br>(0.0492)     |
| Log farm size(ha)                            | 0.679***<br>(0.0719)  | -1.237***<br>(0.1174) | 0.557***<br>(0.1705)  | -1.397***<br>(0.2300) | 0.721***<br>(0.1111)  | -0.950***<br>(0.2077) | 0.659***<br>(0.1111)  | -1.366***<br>(0.1575) |
| Household asset wealth index                 | 0.016<br>(0.0113)     | 0.021<br>(0.0202)     | 0.034*<br>(0.0193)    | 0.009<br>(0.0335)     | 0.033<br>(0.0212)     | 0.019<br>(0.0408)     | -0.009<br>(0.0223)    | 0.035<br>(0.0296)     |
| Agricultural implement access score          | 0.101***<br>(0.0100)  | 0.070***<br>(0.0141)  | 0.098***<br>(0.0156)  | 0.027<br>(0.0332)     | 0.104***<br>(0.0165)  | 0.071***<br>(0.0202)  | 0.106***<br>(0.0197)  | 0.067***<br>(0.0211)  |
| Log Distance to ADMARC(km)                   | -0.075*<br>(0.0414)   | 0.121***<br>(0.0416)  | -0.114<br>(0.0733)    | -0.111<br>(0.1165)    | -0.134**<br>(0.0682)  | 0.185**<br>(0.0802)   | -0.017<br>(0.0622)    | 0.134**<br>(0.0532)   |
| Received fertilizer coupon(1=yes)            | -0.166**<br>(0.0679)  | -0.166*<br>(0.0975)   | -0.165<br>(0.1369)    | -0.465*<br>(0.2394)   | -0.162<br>(0.1156)    | -0.340*<br>(0.1802)   | -0.122<br>(0.1041)    | -0.007<br>(0.1257)    |
| Received seed coupon(1=yes)                  | 0.210***<br>(0.0764)  | 0.039<br>(0.1095)     | 0.219<br>(0.1616)     | 0.459*<br>(0.2557)    | 0.251*<br>(0.1350)    | 0.194<br>(0.2014)     | 0.158<br>(0.1151)     | -0.165<br>(0.1419)    |
| Age of household head(years)                 | -0.010***<br>(0.0012) | -0.004**<br>(0.0020)  | -0.010***<br>(0.0028) | -0.007<br>(0.0046)    | -0.010***<br>(0.0021) | 0.002<br>(0.0040)     | -0.010***<br>(0.0017) | -0.004<br>(0.0024)    |
| Household head attained at least JCE (1=yes) | -0.052<br>(0.0396)    | 0.064<br>(0.0546)     | 0.018<br>(0.1024)     | 0.133<br>(0.1206)     | -0.109<br>(0.0681)    | 0.149<br>(0.1046)     | -0.053<br>(0.0560)    | 0.007<br>(0.0684)     |
| Male household head(1=yes)                   | 0.171***<br>(0.0459)  | 0.141**<br>(0.0662)   | 0.045<br>(0.1001)     | 0.442**<br>(0.1904)   | 0.259***<br>(0.0961)  | 0.147<br>(0.1488)     | 0.173***<br>(0.0627)  | 0.034<br>(0.0774)     |
| Household Size                               | -0.003<br>(0.0101)    | 0.014<br>(0.0157)     | 0.007<br>(0.0244)     | 0.049<br>(0.0354)     | -0.002<br>(0.0173)    | -0.004<br>(0.0281)    | -0.008<br>(0.0148)    | 0.021<br>(0.0227)     |
| Household dependency ratio(%)                | -0.000<br>(0.0002)    | -0.000<br>(0.0004)    | -0.000<br>(0.0006)    | -0.000<br>(0.0007)    | 0.000<br>(0.0004)     | -0.001<br>(0.0008)    | -0.001<br>(0.0004)    | -0.000<br>(0.0006)    |
| Sigma constant                               |                       | 0.698***<br>(0.0168)  |                       | 0.633***<br>(0.0356)  |                       | 0.747***<br>(0.0323)  |                       | 0.654***<br>(0.0215)  |
| Survey year dummies                          | Yes                   |
| District fixed effects                       | Yes                   |
| <i>Observations</i>                          | 25631                 | 906                   | 4123                  | 138                   | 9001                  | 290                   | 12502                 | 478                   |

Notes: Cluster robust standard errors with clustering specified at the primary sampling unit(village) are in parenthesis. Hurdle 1 is a probit regression for the probability of using purchased agrochemicals while Hurdle 2 is the model for intensity of agrochemical purchase for purchasers (log value of purchased agrochemicals(USD/ha), \*  $p < 0.10$ , \*\*  $p < 0.05$ , \*\*\*  $p < 0.01$ .

# Do rainfall shocks prompt commercial input purchase amongst smallholder farmers in diverse regions and environments in Malawi? Lessons for adaptation

Table S10: The influence of rainfall shocks on use of purchased seeds in Malawi by region (Craggit Double hurdle models)

| VARIABLES                                    | <i>National</i>       |                       | <i>Northern</i>       |                       | <i>Central</i>        |                       | <i>Southern</i>       |                       |
|----------------------------------------------|-----------------------|-----------------------|-----------------------|-----------------------|-----------------------|-----------------------|-----------------------|-----------------------|
|                                              | Hurdle1               | Hurdle2               | Hurdle1               | Hurdle2               | Hurdle1               | Hurdle2               | Hurdle1               | Hurdle2               |
| <i>Climate risk variables</i>                | Coef(se)              |
| Growing season drought shock(1-year lag)     | 0.186***<br>(0.0539)  | -0.025<br>(0.0475)    | 0.230**<br>(0.1069)   | 0.065<br>(0.0854)     | 0.033<br>(0.1021)     | -0.370***<br>(0.0922) | 0.082<br>(0.1497)     | 0.377***<br>(0.1225)  |
| Growing season drought shock(2-year lag)     | 0.239***<br>(0.0533)  | 0.031<br>(0.0432)     | 0.259*<br>(0.1541)    | 0.257*<br>(0.1339)    | 0.248<br>(0.2177)     | -0.184<br>(0.1893)    | 0.377***<br>(0.1141)  | 0.185***<br>(0.0903)  |
| Growing season flood shock(1-year lag)       | -0.274***<br>(0.0497) | 0.080<br>(0.0520)     | 0.047<br>(0.1082)     | 0.255**<br>(0.1087)   | -0.177*<br>(0.1037)   | -0.010<br>(0.1005)    | -0.658***<br>(0.1016) | -0.001<br>(0.1127)    |
| Long-term season average rainfall(mm)        | 0.0001<br>(0.0003)    | 0.001***<br>(0.0003)  | -0.001<br>(0.0005)    | 0.0001<br>(0.0005)    | 0.001<br>(0.0006)     | 0.002**<br>(0.0006)   | 0.001**<br>(0.0006)   | 0.001***<br>(0.0005)  |
| Long-term season average temperature (deg)   | 0.007<br>(0.0105)     | 0.012<br>(0.0088)     | -0.008<br>(0.0317)    | 0.006<br>(0.0243)     | -0.017<br>(0.0163)    | -0.022<br>(0.0156)    | 0.033**<br>(0.0139)   | 0.031***<br>(0.0114)  |
| <i>Other control variables</i>               |                       |                       |                       |                       |                       |                       |                       |                       |
| Number of plots cultivated                   | 0.133***<br>(0.0131)  | -0.001<br>(0.0143)    | 0.137***<br>(0.0308)  | -0.005<br>(0.0385)    | 0.116***<br>(0.0199)  | -0.005<br>(0.0212)    | 0.155***<br>(0.0223)  | 0.010<br>(0.0222)     |
| Log farm size(ha)                            | 0.110***<br>(0.0397)  | -1.382***<br>(0.0403) | 0.131<br>(0.0967)     | -1.559***<br>(0.1189) | 0.131**<br>(0.0611)   | -1.311***<br>(0.0647) | 0.053<br>(0.0625)     | -1.403***<br>(0.0565) |
| Household asset wealth index                 | 0.047***<br>(0.0083)  | 0.033***<br>(0.0062)  | 0.087***<br>(0.0177)  | 0.022<br>(0.0163)     | 0.069***<br>(0.0171)  | 0.069***<br>(0.0108)  | 0.018*<br>(0.0108)    | 0.020***<br>(0.0068)  |
| Agricultural implement access score          | 0.043***<br>(0.0065)  | 0.010*<br>(0.0060)    | 0.052***<br>(0.0133)  | 0.009<br>(0.0138)     | 0.063***<br>(0.0111)  | 0.001<br>(0.0098)     | 0.004<br>(0.0103)     | 0.016*<br>(0.0091)    |
| Log Distance to ADMARC(km)                   | -0.020<br>(0.0181)    | 0.006<br>(0.0161)     | -0.021<br>(0.0448)    | -0.004<br>(0.0474)    | -0.057**<br>(0.0282)  | 0.022<br>(0.0269)     | 0.002<br>(0.0268)     | -0.006<br>(0.0218)    |
| Received fertilizer coupon(1=yes)            | -0.236***<br>(0.0269) | -0.088***<br>(0.0271) | -0.271***<br>(0.0760) | -0.154<br>(0.1080)    | -0.150***<br>(0.0405) | -0.065<br>(0.0418)    | -0.298***<br>(0.0403) | -0.093**<br>(0.0374)  |
| Received seed coupon(1=yes)                  | -0.022<br>(0.0325)    | -0.253***<br>(0.0354) | -0.134<br>(0.0868)    | -0.335***<br>(0.1249) | -0.075<br>(0.0571)    | -0.209***<br>(0.0681) | 0.082*<br>(0.0458)    | -0.227***<br>(0.0457) |
| Age of household head(years)                 | -0.009***<br>(0.0006) | -0.002***<br>(0.0006) | -0.010***<br>(0.0014) | -0.003<br>(0.0020)    | -0.010***<br>(0.0010) | -0.001<br>(0.0012)    | -0.007***<br>(0.0008) | -0.002***<br>(0.0008) |
| Household head attained at least JCE (1=yes) | 0.012<br>(0.0180)     | 0.014<br>(0.0172)     | 0.066<br>(0.0462)     | 0.070<br>(0.0537)     | 0.044<br>(0.0300)     | 0.020<br>(0.0320)     | -0.041<br>(0.0258)    | 0.003<br>(0.0216)     |
| Male household head(1=yes)                   | 0.130***<br>(0.0206)  | 0.039*<br>(0.0204)    | 0.152***<br>(0.0560)  | -0.061<br>(0.0572)    | 0.115***<br>(0.0352)  | -0.018<br>(0.0395)    | 0.142***<br>(0.0290)  | 0.074***<br>(0.0261)  |
| Household Size                               | 0.028***<br>(0.0048)  | 0.016***<br>(0.0048)  | 0.022*<br>(0.0117)    | 0.006<br>(0.0128)     | 0.021**<br>(0.0083)   | 0.005<br>(0.0086)     | 0.039***<br>(0.0070)  | 0.026***<br>(0.0064)  |
| Household dependency ratio(%)                | 0.000<br>(0.0001)     | -0.000<br>(0.0001)    | -0.000<br>(0.0003)    | -0.000<br>(0.0004)    | 0.000<br>(0.0002)     | 0.000<br>(0.0002)     | 0.000<br>(0.0001)     | 0.000<br>(0.0001)     |
| Sigma constant                               |                       | 0.831***<br>(0.0083)  |                       | 0.857***<br>(0.0255)  |                       | 0.861***<br>(0.0160)  |                       | 0.801***<br>(0.0101)  |
| Survey year dummies                          | Yes                   |
| District fixed effects                       | Yes                   |
| Observations                                 | 25631                 | 11171                 | 4123                  | 1309                  | 9001                  | 3680                  | 12507                 | 6182                  |

Notes: Cluster robust standard errors with clustering specified at the primary sampling unit(village) are in parenthesis. Hurdle 1 is a probit regression for the probability of using purchased agrochemicals while Hurdle 2 is the model for intensity of purchased seeds for purchasers (log quantity of purchased seed(kg/ha), \*  $p < 0.10$ , \*\*  $p < 0.05$ , \*\*\*  $p < 0.01$ .

# Do rainfall shocks prompt commercial input purchase amongst smallholder farmers in diverse regions and environments in Malawi? Lessons for adaptation

Table S11: The influence of rainfall shocks on use of hired labor in Malawi by region (Craggit Double hurdle models)

| VARIABLES                                    | <i>National</i>       |                       | <i>Northern</i>       |                       | <i>Central</i>        |                       | <i>Southern</i>       |                       |
|----------------------------------------------|-----------------------|-----------------------|-----------------------|-----------------------|-----------------------|-----------------------|-----------------------|-----------------------|
|                                              | Hurdle1               | Hurdle2               | Hurdle1               | Hurdle2               | Hurdle1               | Hurdle2               | Hurdle1               | Hurdle2               |
| <b><i>Climate risk variables</i></b>         | Coef(se)              |
| Growing season drought shock(1-year lag)     | -0.030<br>(0.0659)    | -0.063<br>(0.0791)    | 0.191<br>(0.1280)     | 0.183<br>(0.1349)     | -0.171<br>(0.1243)    | -0.112<br>(0.1557)    | -0.090<br>(0.1957)    | 0.095<br>(0.2328)     |
| Growing season drought shock(2-year lag)     | 0.139**<br>(0.0632)   | -0.105<br>(0.0750)    | 0.289<br>(0.1825)     | -0.358<br>(0.2266)    | -0.057<br>(0.2755)    | 0.289<br>(0.3195)     | 0.018<br>(0.1394)     | -0.522***<br>(0.1608) |
| Growing season flood shock(1-year lag)       | -0.082<br>(0.0676)    | 0.145*<br>(0.0758)    | -0.168<br>(0.1204)    | 0.109<br>(0.1687)     | -0.479***<br>(0.1258) | 0.041<br>(0.1615)     | -0.086<br>(0.1540)    | 0.190<br>(0.1600)     |
| Long-term season average rainfall(mm)        | 0.001***<br>(0.0004)  | 0.001*<br>(0.0004)    | 0.001<br>(0.0006)     | 0.0001<br>(0.0005)    | 0.002**<br>(0.0008)   | 0.0001<br>(0.0011)    | 0.0001<br>(0.0007)    | 0.002*<br>(0.0008)    |
| Long-term season average temperature(deg)    | -0.035**<br>(0.0138)  | -0.027*<br>(0.0158)   | -0.019<br>(0.0382)    | 0.065*<br>(0.0367)    | -0.010<br>(0.0232)    | -0.051*<br>(0.0287)   | -0.068***<br>(0.0194) | -0.028<br>(0.0197)    |
| <b><i>Other control variables</i></b>        |                       |                       |                       |                       |                       |                       |                       |                       |
| Number of plots cultivated                   | 0.022<br>(0.0178)     | 0.033<br>(0.0226)     | -0.017<br>(0.0389)    | -0.060<br>(0.0583)    | 0.001<br>(0.0261)     | -0.011<br>(0.0337)    | 0.071**<br>(0.0315)   | 0.115***<br>(0.0321)  |
| Log farm size(ha)                            | 0.559***<br>(0.0562)  | -1.096***<br>(0.0698) | 0.724***<br>(0.1446)  | -0.741***<br>(0.1550) | 0.636***<br>(0.0887)  | -0.821***<br>(0.1065) | 0.388***<br>(0.0856)  | -1.549***<br>(0.1073) |
| Household asset wealth index                 | 0.255***<br>(0.0186)  | 0.075***<br>(0.0092)  | 0.194***<br>(0.0310)  | 0.090***<br>(0.0194)  | 0.265***<br>(0.0368)  | 0.091***<br>(0.0157)  | 0.271***<br>(0.0282)  | 0.058***<br>(0.0111)  |
| Agricultural implement access score          | 0.102***<br>(0.0084)  | 0.054***<br>(0.0088)  | 0.067***<br>(0.0149)  | 0.052***<br>(0.0182)  | 0.110***<br>(0.0132)  | 0.046***<br>(0.0126)  | 0.124***<br>(0.0140)  | 0.053***<br>(0.0146)  |
| Log Distance to ADMARC(km)                   | -0.031<br>(0.0234)    | -0.040<br>(0.0261)    | -0.061<br>(0.0553)    | -0.040<br>(0.0575)    | 0.008<br>(0.0406)     | -0.053<br>(0.0413)    | -0.038<br>(0.0334)    | -0.013<br>(0.0385)    |
| Received fertilizer coupon(1=yes)            | 0.051*<br>(0.0311)    | -0.145***<br>(0.0427) | -0.016<br>(0.0886)    | -0.012<br>(0.1222)    | -0.018<br>(0.0456)    | -0.196***<br>(0.0637) | 0.105**<br>(0.0485)   | -0.142**<br>(0.0611)  |
| Received seed coupon(1=yes)                  | 0.128***<br>(0.0363)  | 0.168***<br>(0.0488)  | 0.151*<br>(0.0899)    | 0.006<br>(0.1284)     | 0.171***<br>(0.0651)  | 0.119<br>(0.0868)     | 0.121**<br>(0.0521)   | 0.242***<br>(0.0671)  |
| Age of household head(years)                 | -0.003***<br>(0.0007) | -0.001<br>(0.0009)    | -0.001<br>(0.0018)    | -0.001<br>(0.0023)    | -0.005***<br>(0.0011) | -0.001<br>(0.0014)    | -0.002**<br>(0.0010)  | 0.000<br>(0.0013)     |
| Household head attained at least JCE (1=yes) | 0.005<br>(0.0218)     | 0.072**<br>(0.0301)   | 0.166***<br>(0.0572)  | 0.115<br>(0.0793)     | 0.003<br>(0.0368)     | 0.154***<br>(0.0481)  | -0.018<br>(0.0308)    | -0.024<br>(0.0437)    |
| Male household head(1=yes)                   | -0.006<br>(0.0251)    | 0.004<br>(0.0357)     | -0.183***<br>(0.0595) | 0.146*<br>(0.0836)    | 0.023<br>(0.0439)     | -0.034<br>(0.0641)    | 0.019<br>(0.0364)     | 0.022<br>(0.0490)     |
| Household Size                               | -0.075***<br>(0.0066) | -0.037***<br>(0.0090) | -0.082***<br>(0.0150) | -0.064***<br>(0.0198) | -0.075***<br>(0.0109) | -0.047***<br>(0.0148) | -0.076***<br>(0.0101) | -0.014<br>(0.0132)    |
| Household dependency ratio(%)                | 0.0001***<br>(0.0001) | 0.0001<br>(0.0002)    | 0.001***<br>(0.0003)  | -0.0001<br>(0.0006)   | 0.0001<br>(0.0003)    | 0.0001<br>(0.0003)    | 0.001**<br>(0.0002)   | -0.000<br>(0.0003)    |
| Log Family labor(weeks)                      | -0.055***<br>(0.0065) | 0.002<br>(0.0063)     | -0.009<br>(0.0125)    | 0.049***<br>(0.0102)  | -0.066***<br>(0.0116) | -0.004<br>(0.0123)    | -0.071***<br>(0.0094) | -0.024***<br>(0.0084) |
| Sigma constant                               |                       | 0.899***<br>(0.0096)  |                       | 0.883***<br>(0.0248)  |                       | 0.901***<br>(0.0169)  |                       | 0.872***<br>(0.0127)  |
| Survey year dummies                          | Yes                   |
| District fixed effects                       | Yes                   |
| <b><i>Observations</i></b>                   | 25631                 | 4433                  | 4123                  | 706                   | 9001                  | 1678                  | 12502                 | 2049                  |

Notes: Cluster robust standard errors with clustering specified at the primary sampling unit(village) are in parenthesis. Hurdle 1 is a probit regression for the probability of using hired labor, while Hurdle 2 is the model for intensity of use (log days of hired labor(#/ha), \*  $p < 0.10$ , \*\*  $p < 0.05$ , \*\*\*  $p < 0.01$ .

Do rainfall shocks prompt commercial input purchase amongst smallholder farmers in diverse regions and environments in Malawi? Lessons for adaptation

- ✖ Full Table from heterogeneity analysis by household resource endowments and Gender of household head
- A. Figures and tables from descriptive analysis(wealth, gender, and access to information heterogeneities)
- RICH vs POOR Descriptive statistics on input purchasing

Table S12: T-test mean comparison of input purchases in poor and rich households based on household resource endowments

| Variables                                                | Rich    | Poor   | ttest(p-value) | Full_sample |
|----------------------------------------------------------|---------|--------|----------------|-------------|
| Purchased any inputs (1=yes)                             | 0.650   | 0.525  | 0.000***       | 0.587       |
| Value of purchased inputs (USD/ha)                       | 88.683  | 55.785 | 0.000***       | 73.993      |
| Purchased inorganic fertilizer(1=yes)                    | 0.484   | 0.275  | 0.000***       | 0.379       |
| Value of purchased fertilizer (USD/ha)                   | 107.791 | 87.665 | 0.000***       | 100.542     |
| Purchased agrochemicals (herbicides or pesticide)(1=yes) | 0.054   | 0.017  | 0.000***       | 0.036       |
| Value of purchased agrochemicals (USD/ha)                | 10.776  | 10.561 | 0.767          | 10.726      |
| Purchased seed (1=yes)                                   | 0.501   | 0.443  | 0.000***       | 0.472       |
| Value of purchased seed (USD/ha)                         | 18.728  | 16.631 | 0.000***       | 17.750      |
| Quantity of seed purchased(kg/ha)                        | 19.314  | 23.486 | 0.000***       | 21.256      |
| Hired labor(1=yes)                                       | 0.251   | 0.095  | 0.000***       | 0.173       |
| Hire labor(days)                                         | 23.074  | 22.195 | 0.269          | 22.833      |
| Observations                                             | 12815   | 12816  |                | 25631       |

Notes: \*  $p < 0.10$ , \*\*  $p < 0.05$ , \*\*\*  $p < 0.01$ .

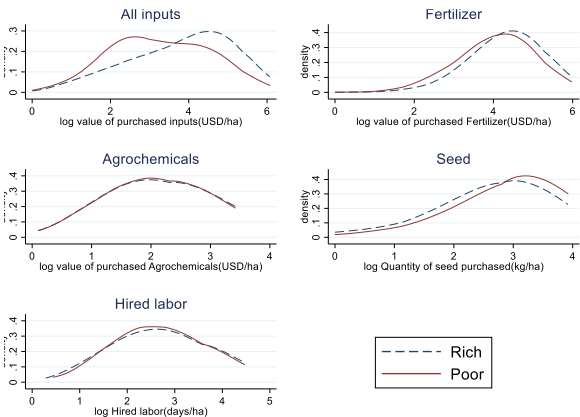

Figure S1:Comparing intensity of input purchases by rich and poor.

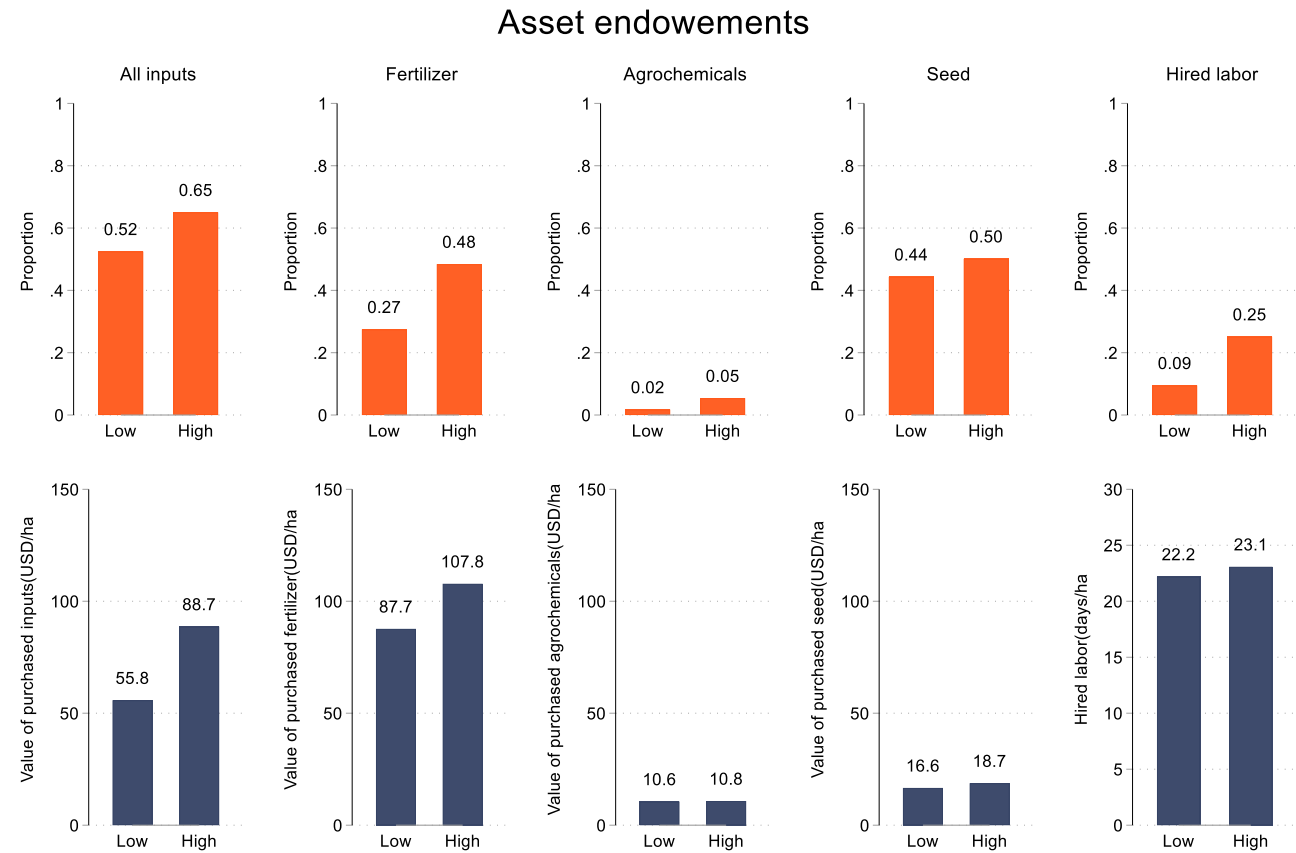

Figure S2:Input purchase by household asset wealth endowments category (Low vs High).Source: Authors’ elaboration of LSMS-ISA datafor Malawi



Do rainfall shocks prompt commercial input purchase amongst smallholder farmers in diverse regions and environments in Malawi? Lessons for adaptation

Male vs. Female-headed households descriptive statistics on input purchasing

Table S13: T-test mean comparison of input purchases in Female and Male headed households

|                                                           | Female | Male    | t_test(p-value) | Full_sample |
|-----------------------------------------------------------|--------|---------|-----------------|-------------|
| Purchased any inputs (1=yes)                              | 0.514  | 0.618   | 0.000***        | 0.587       |
| Value of purchased inputs (USD/ha)                        | 56.063 | 80.088  | 0.000***        | 73.993      |
| Purchased inorganic fertilizer(1=yes)                     | 0.271  | 0.424   | 0.000***        | 0.379       |
| Value of purchased fertilizer (USD/ha)                    | 88.831 | 103.689 | 0.000***        | 100.542     |
| Purchased agrochemicals (herbicides or pesticide) (1=yes) | 0.019  | 0.042   | 0.000***        | 0.036       |
| Value of purchased agrochemicals (USD/ha)                 | 10.484 | 10.772  | 0.729           | 10.726      |
| Purchased seed (1=yes)                                    | 0.414  | 0.496   | 0.000***        | 0.472       |
| Value of purchased seed (USD/ha)                          | 15.063 | 18.685  | 0.000***        | 17.750      |
| Quantity of seed purchased(kg/ha)                         | 22.016 | 20.992  | 0.002***        | 21.256      |
| Hired labor(1=yes)                                        | 0.147  | 0.183   | 0.000***        | 0.173       |
| Hire labor(days)                                          | 23.687 | 22.553  | 0.168           | 22.833      |
| Farmsize(ha)                                              | 0.536  | 0.784   | 0.002***        | 0.712       |
| Agriculture implement access score                        | -0.358 | 0.524   | 0.000***        | 0.268       |
| Household asset wealth index                              | -0.799 | -0.437  | 0.000***        | -0.542      |
| Government extension(1=yes)                               | 0.264  | 0.286   | 0.000***        | 0.280       |
| Access to borrowed credit(yes)                            | 0.197  | 0.223   | 0.000***        | 0.215       |
| Received input coupon(1=yes)                              | 0.315  | 0.322   | 0.289           | 0.320       |

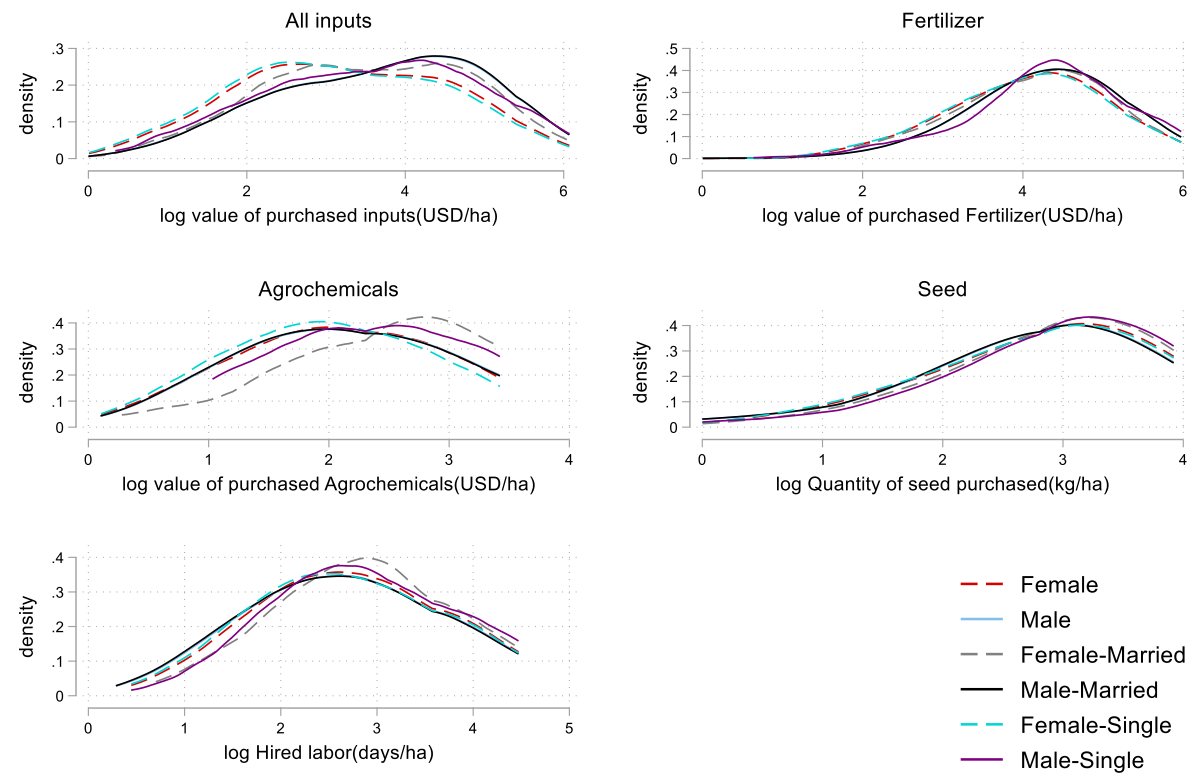

Figure S3: Comparing intensity of input purchases by Gender and marital status of household head.

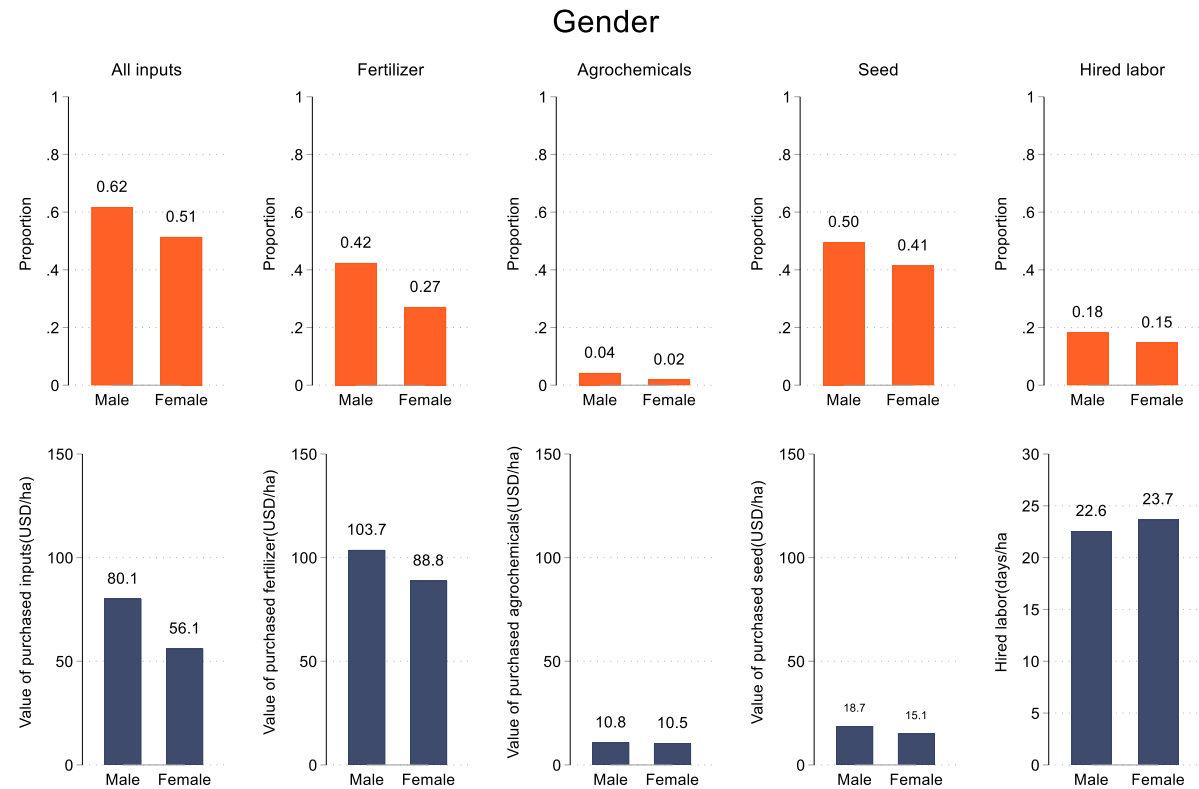

Figure S4:Input purchase by gender of household head (Male vs Female).Source: Authors' elaboration of LSMS-ISA data for Malawi

Do rainfall shocks prompt commercial input purchase amongst smallholder farmers in diverse regions and environments in Malawi? Lessons for adaptation

■ Access vs. No access to information: descriptive statistics on input purchasing (purchase and intensity)

Table S14: T-test mean comparison of input purchases by access to information

|                                                           | Access | No access | t_test(p-value) | Full_sample |
|-----------------------------------------------------------|--------|-----------|-----------------|-------------|
| Purchased any inputs (1=yes)                              | 0.623  | 0.527     | 0.000***        | 0.587       |
| Value of purchased inputs (USD/ha)                        | 75.260 | 71.439    | 0.016**         | 73.993      |
| Purchased inorganic fertilizer(1=yes)                     | 0.403  | 0.339     | 0.000***        | 0.379       |
| Value of purchased fertilizer (USD/ha)                    | 99.464 | 102.930   | 0.097*          | 100.542     |
| Purchased agrochemicals (herbicides or pesticide) (1=yes) | 0.040  | 0.027     | 0.000***        | 0.036       |
| Value of purchased agrochemicals (USD/ha)                 | 10.361 | 11.761    | 0.045**         | 10.726      |
| Purchased seed (1=yes)                                    | 0.486  | 0.448     | 0.000***        | 0.472       |
| Value of purchased seed (USD/ha)                          | 18.001 | 17.246    | 0.042**         | 17.750      |
| Quantity of seed purchased(kg/ha)                         | 20.754 | 22.268    | 0.000***        | 21.256      |
| Hired labor(1=yes)                                        | 0.188  | 0.148     | 0.000***        | 0.173       |
| Hire labor(days)                                          | 23.061 | 22.339    | 0.345           | 22.833      |

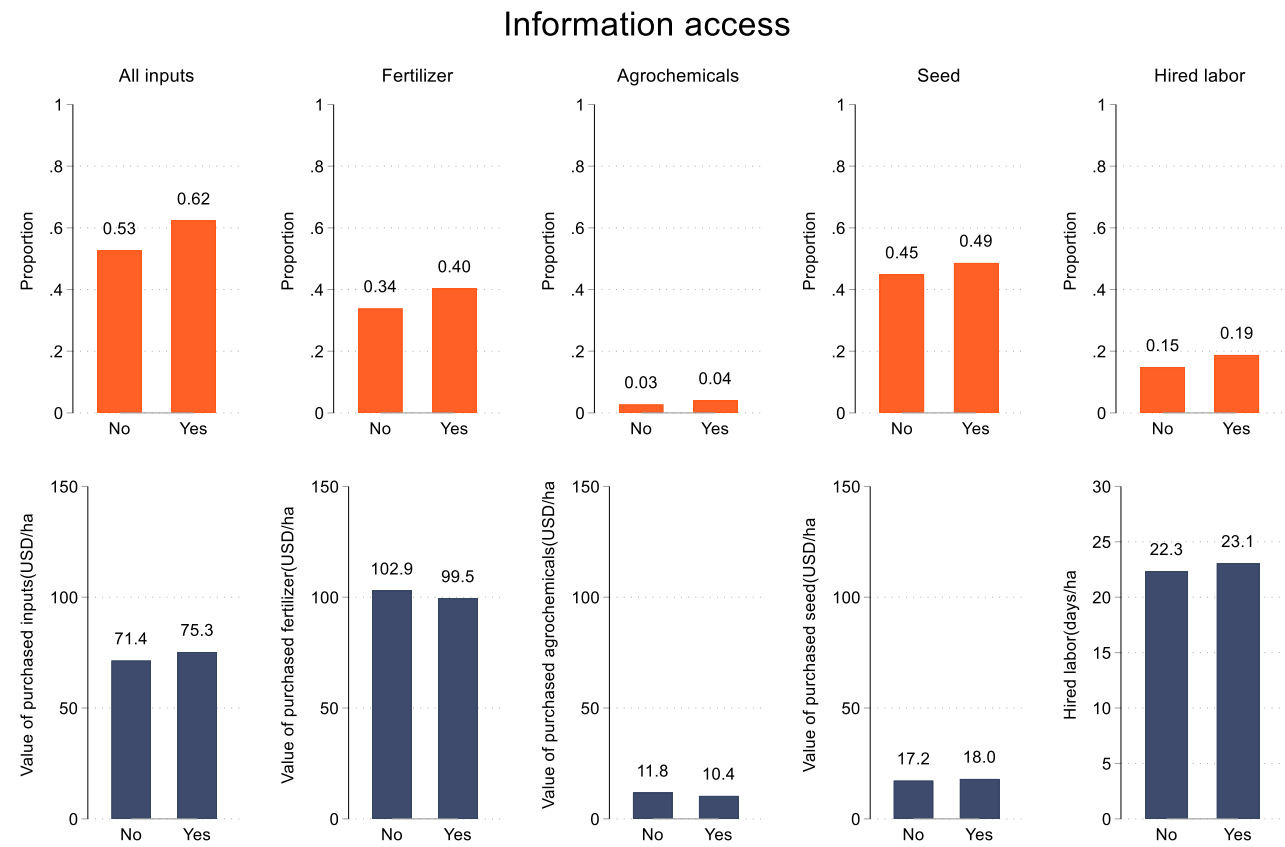

Figure S5:Input purchase by access to information (Yes vs No). Source: Authors' elaboration of LSMS-ISA data for Malawi

Do rainfall shocks prompt commercial input purchase amongst smallholder farmers in diverse regions and environments in Malawi? Lessons for adaptation

B. Econometric analysis full tables by (wealth, gender, and access to information heterogeneities)

- WEALTH HETEROGENEITY: -Econometric results: POOR Sub-sample

Table S15: The impact of climate risk on input purchasing in Malawi in the group of the relatively poorer Households-Double Hurdle Craggit Models

|                                              | ALL INPUTS            |                       | FERTILIZER            |                       | AGROCHEMICALS         |                       | SEED                  |                       | HIRED LABOR           |                       |
|----------------------------------------------|-----------------------|-----------------------|-----------------------|-----------------------|-----------------------|-----------------------|-----------------------|-----------------------|-----------------------|-----------------------|
|                                              | Hurdle1               | Hurdle2               |
| Poor                                         |                       |                       |                       |                       |                       |                       |                       |                       |                       |                       |
| Growing season drought shock(1-year lag)     | 0.029<br>(0.0780)     | 0.022<br>(0.0981)     | -0.062<br>(0.0834)    | -0.015<br>(0.0918)    | 0.286<br>(0.2470)     | -0.249<br>(0.2809)    | 0.062<br>(0.0738)     | -0.050<br>(0.0755)    | -0.023<br>(0.1024)    | -0.006<br>(0.1255)    |
| Growing season drought shock(2-year lag)     | 0.210***<br>(0.0739)  | -0.104<br>(0.0844)    | 0.064<br>(0.0822)     | -0.099<br>(0.0905)    | -0.099<br>(0.1613)    | 0.020<br>(0.2918)     | 0.140**<br>(0.0714)   | 0.095<br>(0.0618)     | 0.225**<br>(0.0957)   | -0.078<br>(0.1399)    |
| Growing season flood shock(1-year lag)       | -0.540***<br>(0.0822) | 0.263***<br>(0.0865)  | -0.012<br>(0.0744)    | 0.099<br>(0.0854)     | -0.442**<br>(0.1988)  | 0.393<br>(0.2861)     | -0.304***<br>(0.0641) | 0.050<br>(0.0661)     | -0.210**<br>(0.0890)  | 0.252*<br>(0.1387)    |
| Long-term season average rainfall(mm)        | 0.001**<br>(0.0004)   | 0.001**<br>(0.0005)   | 0.000<br>(0.0004)     | 0.001**<br>(0.0005)   | 0.001<br>(0.0013)     | 0.000<br>(0.0021)     | 0.001<br>(0.0004)     | 0.001***<br>(0.0004)  | 0.001*<br>(0.0006)    | 0.001<br>(0.0008)     |
| Long-term season average temperature (deg)   | -0.029*<br>(0.0153)   | -0.166***<br>(0.0168) | -0.155***<br>(0.0165) | -0.111***<br>(0.0154) | 0.078*<br>(0.0455)    | -0.052<br>(0.0518)    | 0.009<br>(0.0135)     | 0.012<br>(0.0111)     | -0.035**<br>(0.0176)  | -0.009<br>(0.0247)    |
| Number of plots cultivated                   | 0.059**<br>(0.0231)   | 0.098***<br>(0.0286)  | 0.166***<br>(0.0227)  | -0.008<br>(0.0282)    | 0.260***<br>(0.0433)  | -0.097<br>(0.0795)    | 0.133***<br>(0.0219)  | -0.000<br>(0.0248)    | 0.067**<br>(0.0296)   | 0.058<br>(0.0452)     |
| Log farm size(ha)                            | 0.410***<br>(0.0648)  | -1.489***<br>(0.0832) | 0.602***<br>(0.0695)  | -1.592***<br>(0.0797) | 0.530***<br>(0.1447)  | -1.650***<br>(0.2815) | 0.157**<br>(0.0616)   | -1.493***<br>(0.0644) | 0.401***<br>(0.1072)  | -1.495***<br>(0.1583) |
| Household asset wealth index                 | 0.280***<br>(0.0550)  | 0.809***<br>(0.0626)  | 0.655***<br>(0.0554)  | 0.590***<br>(0.0584)  | 0.148<br>(0.1442)     | 0.240<br>(0.2268)     | 0.061<br>(0.0527)     | 0.144***<br>(0.0460)  | 1.039***<br>(0.0640)  | 0.244***<br>(0.0837)  |
| Agricultural implement access score          | 0.166***<br>(0.0213)  | 0.208***<br>(0.0256)  | 0.239***<br>(0.0225)  | 0.098***<br>(0.0268)  | 0.109**<br>(0.0531)   | 0.075<br>(0.0799)     | 0.056***<br>(0.0208)  | 0.032<br>(0.0195)     | 0.065**<br>(0.0302)   | 0.065<br>(0.0443)     |
| Log Distance to ADMARC(km)                   | -0.055**<br>(0.0272)  | -0.065**<br>(0.0284)  | -0.123***<br>(0.0271) | 0.015<br>(0.0307)     | 0.033<br>(0.0679)     | 0.168*<br>(0.0939)    | 0.001<br>(0.0235)     | 0.003<br>(0.0213)     | -0.011<br>(0.0332)    | -0.060<br>(0.0426)    |
| Received fertilizer coupon(1=yes)            | -0.458***<br>(0.0378) | -0.590***<br>(0.0510) | -0.776***<br>(0.0430) | -0.208***<br>(0.0617) | 0.017<br>(0.1172)     | -0.061<br>(0.1956)    | -0.222***<br>(0.0370) | -0.065*<br>(0.0389)   | 0.104**<br>(0.0471)   | -0.111<br>(0.0755)    |
| Received seed coupon(1=yes)                  | -0.024<br>(0.0478)    | -0.206***<br>(0.0705) | -0.114**<br>(0.0571)  | -0.048<br>(0.0920)    | 0.057<br>(0.1490)     | 0.359<br>(0.2411)     | -0.070<br>(0.0489)    | -0.205***<br>(0.0530) | 0.137**<br>(0.0586)   | 0.179**<br>(0.0862)   |
| Age of household head(years)                 | -0.010<br>(0.0008)    | -0.007***<br>(0.0010) | -0.011***<br>(0.0009) | -0.002<br>(0.0012)    | -0.007***<br>(0.0022) | -0.003<br>(0.0044)    | -0.008***<br>(0.0008) | -0.001<br>(0.0008)    | -0.002<br>(0.0011)    | -0.000<br>(0.0015)    |
| Household head attained at least JCE (1=yes) | -0.039<br>(0.0262)    | 0.012<br>(0.0328)     | -0.049*<br>(0.0288)   | 0.080**<br>(0.0352)   | -0.239***<br>(0.0777) | 0.079<br>(0.1217)     | -0.016<br>(0.0267)    | -0.011<br>(0.0248)    | -0.062*<br>(0.0364)   | -0.045<br>(0.0547)    |
| Male household head(1=yes)                   | 0.104***<br>(0.0291)  | 0.090**<br>(0.0358)   | 0.072**<br>(0.0309)   | 0.046<br>(0.0385)     | 0.099<br>(0.0760)     | 0.116<br>(0.1251)     | 0.111***<br>(0.0282)  | 0.046<br>(0.0282)     | -0.096**<br>(0.0382)  | -0.028<br>(0.0595)    |
| Household Size                               | 0.023***<br>(0.0079)  | 0.023**<br>(0.0096)   | 0.023***<br>(0.0087)  | -0.002<br>(0.0099)    | 0.030<br>(0.0202)     | 0.035<br>(0.0304)     | 0.039***<br>(0.0075)  | 0.019**<br>(0.0079)   | -0.091***<br>(0.0119) | -0.026<br>(0.0206)    |
| Household dependency ratio(%)                | -0.000<br>(0.0002)    | -0.001***<br>(0.0002) | -0.000***<br>(0.0002) | -0.000<br>(0.0002)    | -0.001**<br>(0.0004)  | -0.001<br>(0.0007)    | 0.000<br>(0.0002)     | -0.000<br>(0.0002)    | 0.000*<br>(0.0002)    | -0.000<br>(0.0004)    |
| Log Family labor(weeks)                      |                       |                       |                       |                       |                       |                       |                       |                       | -0.061***<br>(0.0110) | -0.002<br>(0.0112)    |
| Sigma constant                               |                       | 1.142***<br>(0.0107)  |                       | 0.838***<br>(0.0122)  |                       | 0.653***<br>(0.0351)  |                       | 0.801***<br>(0.0111)  |                       | 0.836***<br>(0.0157)  |
| Survey year dummies                          | Yes                   |
| District fixed effects                       | Yes                   |
| Observations                                 | 12816                 | 6724                  | 12816                 | 3168                  | 12075                 | 211                   | 12816                 | 5199                  | 12796                 | 1216                  |

Notes: Cluster robust standard errors with clustering specified at the primary sampling unit(village) are in parenthesis. Hurdle 1 is a probit regression for the probability of input purchase whilst Hurdle 2 is the model for intensity of purchase for purchaser \*  $p < 0.10$ , \*\*  $p < 0.05$ , \*\*\*  $p < 0.01$ .

- WEALTH HETEROGENEITY: Econometric results: RICH Sub-Sample

Table S16: The impact of climate risk on input purchasing in Malawi in the group of relatively richer households- Double Hurdle Craggit Models

|                                              | ALL INPUTS            |                       | FERTILIZER            |                       | AGROCHEMICALS         |                       | SEED                  |                       | HIRED LABOR           |                       |
|----------------------------------------------|-----------------------|-----------------------|-----------------------|-----------------------|-----------------------|-----------------------|-----------------------|-----------------------|-----------------------|-----------------------|
|                                              | Hurdle1               | Hurdle2               |
| Rich                                         |                       |                       |                       |                       |                       |                       |                       |                       |                       |                       |
| Growing season drought shock(1-year lag)     | 0.286***<br>(0.0786)  | 0.143**<br>(0.0729)   | 0.209***<br>(0.0781)  | 0.123**<br>(0.0541)   | 0.718***<br>(0.1363)  | 0.121<br>(0.1360)     | 0.266***<br>(0.0640)  | -0.021<br>(0.0580)    | -0.015<br>(0.0747)    | -0.079<br>(0.0920)    |
| Growing season drought shock(2-year lag)     | 0.340***<br>(0.0771)  | 0.074<br>(0.0748)     | 0.296***<br>(0.0788)  | 0.129**<br>(0.0590)   | 0.240**<br>(0.1184)   | -0.030<br>(0.1422)    | 0.305***<br>(0.0611)  | -0.016<br>(0.0546)    | 0.096<br>(0.0732)     | -0.125<br>(0.0843)    |
| Growing season flood shock(1-year lag)       | -0.365***<br>(0.0924) | 0.281***<br>(0.0739)  | 0.138*<br>(0.0716)    | 0.046<br>(0.0573)     | -0.319**<br>(0.1550)  | -0.117<br>(0.1474)    | -0.245***<br>(0.0618) | 0.092<br>(0.0682)     | -0.015<br>(0.0811)    | 0.104<br>(0.0849)     |
| Long-term season average rainfall(mm)        | 0.001<br>(0.0006)     | 0.002***<br>(0.0005)  | 0.001<br>(0.0005)     | 0.002***<br>(0.0004)  | 0.002**<br>(0.0007)   | 0.000<br>(0.0009)     | 0.000<br>(0.0004)     | 0.001**<br>(0.0004)   | 0.001**<br>(0.0005)   | 0.001<br>(0.0005)     |
| Long-term season average temperature (deg)   | -0.054***<br>(0.0197) | -0.183***<br>(0.0154) | -0.186***<br>(0.0177) | -0.078***<br>(0.0114) | 0.083***<br>(0.0282)  | -0.021<br>(0.0292)    | 0.006<br>(0.0128)     | 0.011<br>(0.0117)     | -0.033**<br>(0.0166)  | -0.032*<br>(0.0182)   |
| Number of plots cultivated                   | 0.008<br>(0.0205)     | 0.049**<br>(0.0197)   | 0.145***<br>(0.0190)  | -0.030*<br>(0.0162)   | 0.118***<br>(0.0256)  | 0.003<br>(0.0379)     | 0.127***<br>(0.0159)  | 0.001<br>(0.0170)     | 0.000<br>(0.0202)     | 0.024<br>(0.0258)     |
| Log farm size(ha)                            | 0.445***<br>(0.0582)  | -0.826***<br>(0.0547) | 0.649***<br>(0.0564)  | -0.982***<br>(0.0509) | 0.680***<br>(0.0848)  | -1.177***<br>(0.1242) | 0.053<br>(0.0490)     | -1.331***<br>(0.0510) | 0.572***<br>(0.0665)  | -1.007***<br>(0.0781) |
| Household asset wealth index                 | 0.043***<br>(0.0117)  | 0.136***<br>(0.0117)  | 0.135***<br>(0.0150)  | 0.083***<br>(0.0081)  | 0.005<br>(0.0117)     | 0.014<br>(0.0202)     | 0.044***<br>(0.0084)  | 0.033***<br>(0.0065)  | 0.218***<br>(0.0169)  | 0.072***<br>(0.0095)  |
| Agricultural implement access score          | 0.050***<br>(0.0094)  | 0.115***<br>(0.0076)  | 0.090***<br>(0.0096)  | 0.085***<br>(0.0065)  | 0.079***<br>(0.0110)  | 0.077<br>(0.0151)     | 0.033***<br>(0.0075)  | 0.009<br>(0.0072)     | 0.069***<br>(0.0090)  | 0.049***<br>(0.0095)  |
| Log Distance to ADMARC(km)                   | -0.063**<br>(0.0320)  | -0.058**<br>(0.0256)  | -0.099***<br>(0.0277) | -0.026<br>(0.0204)    | -0.111**<br>(0.0436)  | 0.090*<br>(0.0487)    | -0.036<br>(0.0234)    | 0.006<br>(0.0214)     | -0.026<br>(0.0276)    | -0.028<br>(0.0306)    |
| Received fertilizer coupon(1=yes)            | -0.536***<br>(0.0392) | -0.673***<br>(0.0428) | -0.818***<br>(0.0381) | -0.319***<br>(0.0397) | -0.254***<br>(0.0806) | -0.226**<br>(0.1138)  | -0.261***<br>(0.0371) | -0.107***<br>(0.0382) | -0.010<br>(0.0390)    | -0.149***<br>(0.0514) |
| Received seed coupon(1=yes)                  | 0.108**<br>(0.0427)   | -0.148***<br>(0.0540) | -0.028<br>(0.0436)    | 0.035<br>(0.0478)     | 0.254***<br>(0.0891)  | 0.004<br>(0.1241)     | 0.015<br>(0.0421)     | -0.265***<br>(0.0456) | 0.116**<br>(0.0451)   | 0.163***<br>(0.0590)  |
| Age of household head(years)                 | -0.009***<br>(0.0009) | -0.008***<br>(0.0010) | -0.011***<br>(0.0009) | -0.003***<br>(0.0008) | -0.011***<br>(0.0015) | -0.005**<br>(0.0022)  | -0.009***<br>(0.0008) | -0.002**<br>(0.0009)  | -0.004***<br>(0.0009) | -0.001<br>(0.0011)    |
| Household head attained at least JCE (1=yes) | 0.040<br>(0.0274)     | 0.109***<br>(0.0273)  | 0.094***<br>(0.0271)  | 0.077***<br>(0.0231)  | 0.005<br>(0.0457)     | 0.042<br>(0.0597)     | 0.028<br>(0.0257)     | 0.034<br>(0.0244)     | 0.050*<br>(0.0285)    | 0.111***<br>(0.0363)  |
| Male household head(1=yes)                   | 0.156***<br>(0.0318)  | 0.218***<br>(0.0362)  | 0.154***<br>(0.0334)  | 0.127***<br>(0.0319)  | 0.137**<br>(0.0615)   | 0.178**<br>(0.0794)   | 0.142***<br>(0.0317)  | 0.019<br>(0.0303)     | -0.045<br>(0.0344)    | -0.005<br>(0.0450)    |
| Household Size                               | 0.007<br>(0.0067)     | 0.009<br>(0.0070)     | 0.010<br>(0.0070)     | 0.003<br>(0.0061)     | -0.018<br>(0.0121)    | 0.010<br>(0.0183)     | 0.019***<br>(0.0061)  | 0.016***<br>(0.0062)  | -0.079***<br>(0.0079) | -0.041***<br>(0.0101) |
| Household dependency ratio(%)                | 0.000<br>(0.0002)     | -0.000**<br>(0.0002)  | -0.000<br>(0.0002)    | -0.000***<br>(0.0002) | 0.000<br>(0.0003)     | 0.000<br>(0.0005)     | -0.000<br>(0.0002)    | 0.000<br>(0.0002)     | 0.001***<br>(0.0002)  | 0.000<br>(0.0002)     |
| Log Family labor(weeks)                      |                       |                       |                       |                       |                       |                       |                       |                       | -0.053***<br>(0.0079) | 0.002<br>(0.0075)     |
| Sigma constant                               |                       | 1.110***<br>(0.0098)  |                       | 0.792***<br>(0.0094)  |                       | 0.685***<br>(0.0183)  |                       | 0.853***<br>(0.0109)  |                       | 0.914***<br>(0.0113)  |
| Survey year dummies                          | Yes                   |
| District fixed effects                       | Yes                   |
| Observations                                 | 12815                 | 8334                  | 12815                 | 5628                  | 12789                 | 695                   | 12815                 | 5972                  | 12815                 | 3217                  |

Notes: Cluster robust standard errors with clustering specified at the primary sampling unit(village) are in parenthesis. Hurdle 1 is a probit regression for the probability of input purchase whilst Hurdle 2 is the model for intensity of purchase for purchaser \*  $p < 0.10$ , \*\*  $p < 0.05$ , \*\*\*  $p < 0.01$ .

## *Do rainfall shocks prompt commercial input purchase amongst smallholder farmers in diverse regions and environments in Malawi? Lessons for adaptation*

- **GENDER HETEROGENEITY:** - Econometric results: Female-headed households

Table S17: The impact of climate risk on input purchasing in Malawi in female-headed households- Double Hurdle Craggit Models

[illegible]

- **GENDER HETEROGENEITY:** - Econometric results: Male headed households

*Table S18: The impact of climate risk on input purchasing in Malawi in male-headed households- Double Hurdle Craggit Models*

|                                              | ALL INPUTS            |                       | FERTILIZER            |                       | AGROCHEMICALS         |                       | SEED                  |                       | HIRED LABOR           |                       |
|----------------------------------------------|-----------------------|-----------------------|-----------------------|-----------------------|-----------------------|-----------------------|-----------------------|-----------------------|-----------------------|-----------------------|
|                                              | Hurdle1               | Hurdle2               |
| <b>Male headed households</b>                |                       |                       |                       |                       |                       |                       |                       |                       |                       |                       |
| Growing season drought shock(1-year lag)     | 0.145**<br>(0.0666)   | 0.185***<br>(0.0652)  | 0.159**<br>(0.0720)   | 0.101**<br>(0.0504)   | 0.289**<br>(0.1146)   | 0.005<br>(0.1281)     | 0.096*<br>(0.0582)    | -0.009<br>(0.0494)    | -0.060<br>(0.0728)    | -0.121<br>(0.0934)    |
| Growing season drought shock(2-year lag)     | 0.272***<br>(0.0695)  | 0.023<br>(0.0659)     | 0.115*<br>(0.0690)    | 0.064<br>(0.0587)     | 0.138<br>(0.1064)     | -0.142<br>(0.1133)    | 0.285***<br>(0.0563)  | 0.116**<br>(0.0454)   | 0.155**<br>(0.0691)   | -0.238***<br>(0.0836) |
| Growing season flood shock(1-year lag)       | -0.512***<br>(0.0836) | 0.280***<br>(0.0687)  | 0.104<br>(0.0643)     | 0.017<br>(0.0567)     | -0.406***<br>(0.1563) | -0.040<br>(0.1416)    | -0.348***<br>(0.0551) | 0.049<br>(0.0574)     | -0.161**<br>(0.0736)  | 0.045<br>(0.0850)     |
| Long-term season average rainfall(mm)        | -0.000<br>(0.0003)    | 0.001***<br>(0.0003)  | 0.000<br>(0.0003)     | 0.001***<br>(0.0002)  | -0.000<br>(0.0004)    | 0.001**<br>(0.0005)   | -0.000<br>(0.0002)    | 0.001***<br>(0.0002)  | 0.001***<br>(0.0003)  | 0.001***<br>(0.0004)  |
| Long-term season average temperature (deg)   | -0.044***<br>(0.0103) | -0.179***<br>(0.0090) | -0.197***<br>(0.0099) | -0.091***<br>(0.0076) | 0.164***<br>(0.0179)  | 0.033*<br>(0.0185)    | 0.017**<br>(0.0073)   | 0.016***<br>(0.0063)  | -0.009<br>(0.0099)    | -0.045***<br>(0.0110) |
| Number of plots cultivated                   | 0.019<br>(0.0191)     | 0.076***<br>(0.0177)  | 0.165***<br>(0.0168)  | -0.020<br>(0.0150)    | 0.140***<br>(0.0235)  | 0.026<br>(0.0356)     | 0.126***<br>(0.0146)  | -0.004<br>(0.0158)    | 0.009<br>(0.0196)     | 0.017<br>(0.0254)     |
| Log farm size(ha)                            | 0.417***<br>(0.0511)  | -0.932***<br>(0.0526) | 0.576***<br>(0.0500)  | -1.070***<br>(0.0471) | 0.685***<br>(0.0779)  | -1.246***<br>(0.1168) | 0.005<br>(0.0438)     | -1.321***<br>(0.0443) | 0.505***<br>(0.0637)  | -1.052***<br>(0.0783) |
| Household asset wealth index                 | 0.062***<br>(0.0135)  | 0.165***<br>(0.0144)  | 0.176***<br>(0.0166)  | 0.094***<br>(0.0096)  | 0.006<br>(0.0125)     | 0.033<br>(0.0218)     | 0.052***<br>(0.0094)  | 0.033***<br>(0.0069)  | 0.255***<br>(0.0201)  | 0.073***<br>(0.0102)  |
| Agricultural implement access score          | 0.094***<br>(0.0091)  | 0.150***<br>(0.0082)  | 0.133***<br>(0.0091)  | 0.103***<br>(0.0068)  | 0.099***<br>(0.0100)  | 0.069***<br>(0.0142)  | 0.050***<br>(0.0072)  | 0.008<br>(0.0065)     | 0.110***<br>(0.0092)  | 0.053***<br>(0.0096)  |
| Log Distance to ADMARC(km)                   | -0.056**<br>(0.0257)  | -0.037*<br>(0.0222)   | -0.074***<br>(0.0238) | -0.003<br>(0.0185)    | -0.139***<br>(0.0391) | 0.110***<br>(0.0370)  | -0.041**<br>(0.0190)  | -0.021<br>(0.0174)    | -0.029<br>(0.0243)    | -0.016<br>(0.0282)    |
| Received fertilizer coupon(1=yes)            | -0.485***<br>(0.0338) | -0.549***<br>(0.0392) | -0.685***<br>(0.0335) | -0.284***<br>(0.0367) | -0.285***<br>(0.0758) | -0.168<br>(0.1024)    | -0.268***<br>(0.0304) | -0.108***<br>(0.0316) | 0.024<br>(0.0365)     | -0.142***<br>(0.0510) |
| Received seed coupon(1=yes)                  | 0.058<br>(0.0397)     | -0.132***<br>(0.0507) | -0.055<br>(0.0391)    | 0.079*<br>(0.0461)    | 0.226***<br>(0.0863)  | -0.020<br>(0.1176)    | -0.049<br>(0.0373)    | -0.239***<br>(0.0411) | 0.182***<br>(0.0418)  | 0.150***<br>(0.0572)  |
| Age of household head(years)                 | -0.009***<br>(0.0007) | -0.008***<br>(0.0009) | -0.011***<br>(0.0007) | -0.003***<br>(0.0008) | -0.010***<br>(0.0013) | -0.006**<br>(0.0022)  | -0.008***<br>(0.0007) | -0.002**<br>(0.0007)  | -0.006***<br>(0.0008) | -0.002<br>(0.0011)    |
| Household head attained at least JCE (1=yes) | 0.011<br>(0.0226)     | 0.091***<br>(0.0255)  | 0.050**<br>(0.0235)   | 0.089***<br>(0.0229)  | -0.021<br>(0.0413)    | 0.034<br>(0.0602)     | 0.034<br>(0.0212)     | 0.009<br>(0.0207)     | 0.036<br>(0.0255)     | 0.103***<br>(0.0361)  |
| Household Size                               | 0.012*<br>(0.0064)    | 0.020***<br>(0.0068)  | 0.017**<br>(0.0066)   | 0.005<br>(0.0063)     | -0.018<br>(0.0115)    | 0.020<br>(0.0180)     | 0.025***<br>(0.0060)  | 0.014**<br>(0.0058)   | -0.079***<br>(0.0079) | -0.047***<br>(0.0107) |
| Household dependency ratio(%)                | 0.000*<br>(0.0002)    | -0.000*<br>(0.0002)   | -0.000<br>(0.0002)    | -0.000*<br>(0.0002)   | 0.000<br>(0.0003)     | -0.000<br>(0.0005)    | 0.000<br>(0.0002)     | 0.000<br>(0.0002)     | 0.001***<br>(0.0002)  | 0.000*<br>(0.0003)    |
| Log Family labor(weeks)                      |                       |                       |                       |                       |                       |                       |                       |                       | -0.045***<br>(0.0073) | 0.004<br>(0.0070)     |
| Sigma constant                               |                       | 1.146***<br>(0.0086)  |                       | 0.824***<br>(0.0090)  |                       | 0.717***<br>(0.0183)  |                       | 0.846***<br>(0.0098)  |                       | 0.918***<br>(0.0109)  |
| Survey year dummies                          | Yes                   |
| District fixed effects                       | Yes                   |
| Observations                                 | 18199                 | 11238                 | 18199                 | 6933                  | 18199                 | 760                   | 18199                 | 8292                  | 18199                 | 3337                  |

Do rainfall shocks prompt commercial input purchase amongst smallholder farmers in diverse regions and environments in Malawi? Lessons for adaptation

INFORMATION ACCESS HETEROGENEITY: Econometric results Access to information sub-sample

Table S19: The impact of climate risk on input purchasing in Malawi in the sub-sample of households with access to information- Double Hurdle Craggit Models

|                                              | ALL INPUTS            |                       | FERTILIZER            |                       | AGROCHEMICALS         |                       | SEED                  |                       | HIRED LABOR           |                       |
|----------------------------------------------|-----------------------|-----------------------|-----------------------|-----------------------|-----------------------|-----------------------|-----------------------|-----------------------|-----------------------|-----------------------|
|                                              | Hurdle2               | Hurdle1               | Hurdle2               | Hurdle1               | Hurdle1               | Hurdle2               | Hurdle1               | Hurdle2               | Hurdle1               | Hurdle1               |
| main                                         |                       |                       |                       |                       |                       |                       |                       |                       |                       |                       |
| Growing season drought shock(1-year lag)     | 0.214***<br>(0.0610)  | 0.274***<br>(0.0664)  | 0.225***<br>(0.0698)  | 0.176***<br>(0.0514)  | 0.325***<br>(0.1147)  | 0.079<br>(0.1251)     | 0.112*<br>(0.0579)    | -0.018<br>(0.0488)    | -0.015<br>(0.0694)    | 0.033<br>(0.0898)     |
| Growing season drought shock(2-year lag)     | 0.402***<br>(0.0685)  | 0.018<br>(0.0684)     | 0.242***<br>(0.0721)  | 0.021<br>(0.0662)     | 0.140<br>(0.1138)     | -0.149<br>(0.1190)    | 0.386***<br>(0.0620)  | 0.052<br>(0.0501)     | 0.127*<br>(0.0694)    | -0.087<br>(0.0869)    |
| Growing season flood shock(1-year lag)       | -0.316***<br>(0.0905) | 0.299***<br>(0.0821)  | 0.166**<br>(0.0771)   | 0.023<br>(0.0715)     | -0.487***<br>(0.1851) | 0.006<br>(0.1722)     | -0.336***<br>(0.0709) | 0.082<br>(0.0661)     | -0.024<br>(0.0848)    | 0.162*<br>(0.0983)    |
| Long-term season average rainfall(mm)        | -0.000<br>(0.0003)    | 0.001***<br>(0.0003)  | 0.000<br>(0.0003)     | 0.001***<br>(0.0002)  | -0.001*<br>(0.0005)   | 0.002***<br>(0.0005)  | -0.000<br>(0.0002)    | 0.001***<br>(0.0002)  | 0.001***<br>(0.0003)  | 0.001***<br>(0.0004)  |
| Long-term season average temperature (deg)   | -0.040***<br>(0.0099) | -0.169***<br>(0.0096) | -0.183***<br>(0.0104) | -0.093***<br>(0.0084) | 0.167***<br>(0.0187)  | 0.060***<br>(0.0189)  | 0.014*<br>(0.0080)    | 0.024***<br>(0.0065)  | -0.008<br>(0.0096)    | -0.046***<br>(0.0113) |
| Number of plots cultivated                   | 0.055***<br>(0.0215)  | 0.071***<br>(0.0198)  | 0.162***<br>(0.0190)  | -0.018<br>(0.0176)    | 0.134***<br>(0.0268)  | 0.024<br>(0.0414)     | 0.122***<br>(0.0168)  | 0.014<br>(0.0172)     | 0.018<br>(0.0212)     | -0.019<br>(0.0274)    |
| Log farm size(ha)                            | 0.475***<br>(0.0530)  | -0.984***<br>(0.0552) | 0.644***<br>(0.0531)  | -1.084***<br>(0.0520) | 0.626***<br>(0.0841)  | -1.266***<br>(0.1288) | 0.089*<br>(0.0473)    | -1.379***<br>(0.0468) | 0.474***<br>(0.0672)  | -1.014***<br>(0.0816) |
| Household asset wealth index                 | 0.082***<br>(0.0151)  | 0.159***<br>(0.0159)  | 0.181***<br>(0.0205)  | 0.094***<br>(0.0110)  | -0.005<br>(0.0142)    | 0.024<br>(0.0273)     | 0.055***<br>(0.0102)  | 0.034***<br>(0.0077)  | 0.286***<br>(0.0194)  | 0.074***<br>(0.0110)  |
| Agricultural implement access score          | 0.089***<br>(0.0097)  | 0.156***<br>(0.0089)  | 0.126***<br>(0.0098)  | 0.110***<br>(0.0076)  | 0.106***<br>(0.0113)  | 0.074***<br>(0.0140)  | 0.048***<br>(0.0077)  | 0.008<br>(0.0070)     | 0.109***<br>(0.0093)  | 0.053***<br>(0.0099)  |
| Log Distance to ADMARC(km)                   | -0.055**<br>(0.0239)  | -0.041*<br>(0.0228)   | -0.076***<br>(0.0237) | -0.001<br>(0.0195)    | -0.134***<br>(0.0420) | 0.165***<br>(0.0426)  | -0.041**<br>(0.0199)  | -0.004<br>(0.0171)    | -0.040*<br>(0.0237)   | -0.000<br>(0.0299)    |
| Received fertilizer coupon(1=yes)            | -0.497***<br>(0.0356) | -0.607***<br>(0.0416) | -0.756***<br>(0.0368) | -0.294***<br>(0.0404) | -0.334***<br>(0.0855) | -0.041<br>(0.1123)    | -0.193***<br>(0.0338) | -0.077**<br>(0.0329)  | 0.055<br>(0.0390)     | -0.141***<br>(0.0525) |
| Received seed coupon(1=yes)                  | 0.000<br>(0.0407)     | -0.095*<br>(0.0534)   | -0.005<br>(0.0422)    | 0.063<br>(0.0508)     | 0.208**<br>(0.0934)   | -0.010<br>(0.1339)    | -0.119***<br>(0.0408) | -0.257***<br>(0.0414) | 0.100**<br>(0.0435)   | 0.184***<br>(0.0612)  |
| Age of household head(years)                 | -0.011***<br>(0.0007) | -0.010***<br>(0.0009) | -0.012***<br>(0.0008) | -0.004***<br>(0.0008) | -0.010***<br>(0.0014) | -0.006***<br>(0.0021) | -0.009***<br>(0.0007) | -0.002***<br>(0.0007) | -0.003***<br>(0.0008) | -0.001<br>(0.0011)    |
| Household head attained at least JCE (1=yes) | -0.017<br>(0.0232)    | 0.076***<br>(0.0267)  | 0.007<br>(0.0252)     | 0.089***<br>(0.0247)  | -0.028<br>(0.0449)    | 0.053<br>(0.0640)     | -0.006<br>(0.0224)    | 0.020<br>(0.0214)     | -0.006<br>(0.0273)    | 0.117***<br>(0.0371)  |
| Household Size                               | 0.017***<br>(0.0062)  | 0.028***<br>(0.0068)  | 0.023***<br>(0.0065)  | 0.006<br>(0.0065)     | -0.001<br>(0.0109)    | 0.022<br>(0.0192)     | 0.030***<br>(0.0057)  | 0.021***<br>(0.0057)  | -0.082***<br>(0.0078) | -0.039***<br>(0.0112) |
| Household dependency ratio(%)                | -0.000**<br>(0.0001)  | -0.001***<br>(0.0002) | -0.001***<br>(0.0001) | -0.000***<br>(0.0002) | -0.001*<br>(0.0003)   | -0.000<br>(0.0005)    | -0.000**<br>(0.0001)  | -0.000<br>(0.0001)    | 0.001***<br>(0.0002)  | 0.000<br>(0.0002)     |
| Log Family labor(weeks)                      |                       |                       |                       |                       |                       |                       |                       |                       | -0.056***<br>(0.0082) | 0.002<br>(0.0075)     |
| Sigma constant                               |                       | 1.143***<br>(0.0090)  |                       | 0.839***<br>(0.0095)  |                       | 0.712***<br>(0.0199)  |                       | 0.832***<br>(0.0098)  |                       | 0.914***<br>(0.0112)  |
| Survey year dummies                          | Yes                   |
| District fixed effects                       | Yes                   |
| Observations                                 | 16152                 | 10065                 | 16152                 | 6059                  | 16152                 | 670                   | 16152                 | 7468                  | 16152                 | 3033                  |

Standard errors in parentheses; \*  $p < 0.10$ , \*\*  $p < 0.05$ , \*\*\*  $p < 0.01$

INFORMATION ACCESS HETEROGENEITY: Econometric results No Access to information sub-sample

Table S20: The impact of climate risk on input purchasing in Malawi in the sub-group of households with no access to information- Double Hurdle Craggit Models

|                                              | ALL INPUTS            |                       | FERTILIZER            |                       | AGROCHEMICALS         |                       | SEED                  |                       | HIRED LABOR           |                       |
|----------------------------------------------|-----------------------|-----------------------|-----------------------|-----------------------|-----------------------|-----------------------|-----------------------|-----------------------|-----------------------|-----------------------|
|                                              | Hurdle2               | Hurdle1               | Hurdle2               | Hurdle1               | Hurdle1               | Hurdle2               | Hurdle1               | Hurdle2               | Hurdle1               | Hurdle1               |
| main                                         |                       |                       |                       |                       |                       |                       |                       |                       |                       |                       |
| Growing season drought shock(1-year lag)     | -0.063<br>(0.1063)    | -0.164<br>(0.1174)    | -0.232**<br>(0.1031)  | -0.113<br>(0.0953)    | 0.096<br>(0.1743)     | -0.176<br>(0.2762)    | 0.009<br>(0.0978)     | -0.018<br>(0.0906)    | -0.105<br>(0.1199)    | -0.257*<br>(0.1500)   |
| Growing season drought shock(2-year lag)     | 0.169*<br>(0.0890)    | -0.038<br>(0.0941)    | -0.067<br>(0.0849)    | 0.136<br>(0.0836)     | 0.280*<br>(0.1441)    | -0.067<br>(0.1936)    | 0.223***<br>(0.0763)  | 0.102<br>(0.0685)     | 0.172*<br>(0.0970)    | -0.366***<br>(0.1242) |
| Growing season flood shock(1-year lag)       | -0.689***<br>(0.0901) | 0.195**<br>(0.0950)   | -0.024<br>(0.0740)    | -0.005<br>(0.0785)    | -0.467**<br>(0.1863)  | -0.241<br>(0.1923)    | -0.381***<br>(0.0664) | -0.001<br>(0.0707)    | -0.252***<br>(0.0924) | 0.037<br>(0.1323)     |
| Long-term season average rainfall(mm)        | 0.000<br>(0.0004)     | -0.000<br>(0.0004)    | -0.001*<br>(0.0004)   | 0.000<br>(0.0004)     | -0.000<br>(0.0006)    | 0.001<br>(0.0009)     | -0.000<br>(0.0003)    | 0.001**<br>(0.0003)   | 0.002***<br>(0.0004)  | 0.001<br>(0.0005)     |
| Long-term season average temperature (deg)   | -0.045***<br>(0.0134) | -0.210***<br>(0.0133) | -0.216***<br>(0.0124) | -0.104***<br>(0.0123) | 0.159***<br>(0.0267)  | -0.002<br>(0.0286)    | 0.025**<br>(0.0101)   | 0.004<br>(0.0097)     | -0.026*<br>(0.0149)   | -0.028<br>(0.0173)    |
| Number of plots cultivated                   | -0.007<br>(0.0237)    | 0.087***<br>(0.0276)  | 0.148***<br>(0.0220)  | -0.003<br>(0.0217)    | 0.182***<br>(0.0351)  | -0.065<br>(0.0700)    | 0.142***<br>(0.0202)  | -0.021<br>(0.0242)    | 0.015<br>(0.0279)     | 0.168***<br>(0.0407)  |
| Log farm size(ha)                            | 0.397***<br>(0.0716)  | -1.126***<br>(0.0880) | 0.621***<br>(0.0691)  | -1.304***<br>(0.0726) | 0.588***<br>(0.1234)  | -1.246***<br>(0.2329) | -0.012<br>(0.0678)    | -1.385***<br>(0.0705) | 0.512***<br>(0.0995)  | -1.522***<br>(0.1264) |
| Household asset wealth index                 | 0.043***<br>(0.0185)  | 0.200***<br>(0.0214)  | 0.178***<br>(0.0263)  | 0.108***<br>(0.0146)  | 0.024<br>(0.0203)     | 0.052**<br>(0.0206)   | 0.045***<br>(0.0144)  | 0.019<br>(0.0117)     | 0.223***<br>(0.0279)  | 0.086***<br>(0.0148)  |
| Agricultural implement access score          | 0.107***<br>(0.0144)  | 0.191***<br>(0.0156)  | 0.173***<br>(0.0156)  | 0.113***<br>(0.0124)  | 0.103***<br>(0.0185)  | 0.085***<br>(0.0310)  | 0.030**<br>(0.0121)   | 0.023**<br>(0.0106)   | 0.091***<br>(0.0163)  | 0.048***<br>(0.0184)  |
| Log Distance to ADMARC(km)                   | -0.027<br>(0.0344)    | -0.104***<br>(0.0350) | -0.073**<br>(0.0311)  | -0.049<br>(0.0307)    | -0.087<br>(0.0572)    | 0.008<br>(0.0751)     | -0.020<br>(0.0271)    | -0.006<br>(0.0253)    | -0.058<br>(0.0376)    | -0.013<br>(0.0423)    |
| Received fertilizer coupon(1=yes)            | -0.407***<br>(0.0437) | -0.580***<br>(0.0593) | -0.618***<br>(0.0453) | -0.219***<br>(0.0557) | -0.175*<br>(0.1054)   | -0.447**<br>(0.1873)  | -0.297***<br>(0.0395) | -0.133***<br>(0.0478) | 0.085*<br>(0.0497)    | -0.134*<br>(0.0727)   |
| Received seed coupon(1=yes)                  | 0.138***<br>(0.0520)  | -0.262***<br>(0.0795) | -0.143**<br>(0.0584)  | -0.014<br>(0.0781)    | 0.227*<br>(0.1161)    | 0.108<br>(0.2103)     | 0.087*<br>(0.0493)    | -0.289***<br>(0.0624) | 0.233***<br>(0.0612)  | 0.106<br>(0.0822)     |
| Age of household head(years)                 | -0.010***<br>(0.0009) | -0.007***<br>(0.0013) | -0.011***<br>(0.0010) | -0.001<br>(0.0011)    | -0.009***<br>(0.0020) | -0.005<br>(0.0040)    | -0.009***<br>(0.0009) | -0.002*<br>(0.0010)   | -0.003***<br>(0.0011) | -0.000<br>(0.0015)    |
| Household head attained at least JCE (1=yes) | -0.011<br>(0.0302)    | -0.007<br>(0.0385)    | -0.004<br>(0.0328)    | 0.023<br>(0.0350)     | -0.098<br>(0.0679)    | 0.111<br>(0.1087)     | 0.017<br>(0.0297)     | 0.023<br>(0.0299)     | 0.001<br>(0.0361)     | -0.036<br>(0.0526)    |
| Household Size                               | 0.039***<br>(0.0083)  | 0.035***<br>(0.0098)  | 0.032***<br>(0.0087)  | 0.017**<br>(0.0087)   | 0.061<br>(0.0151)     | -0.001<br>(0.0293)    | 0.044***<br>(0.0074)  | 0.017**<br>(0.0079)   | -0.062***<br>(0.0111) | -0.025*<br>(0.0151)   |
| Household dependency ratio(%)                | -0.000<br>(0.0002)    | -0.001***<br>(0.0002) | -0.000*<br>(0.0002)   | -0.001***<br>(0.0002) | -0.000<br>(0.0004)    | -0.000<br>(0.0007)    | -0.000<br>(0.0002)    | 0.000<br>(0.0002)     | 0.000<br>(0.0002)     | -0.000<br>(0.0003)    |
| Log Family labor(weeks)                      |                       |                       |                       |                       |                       |                       |                       |                       | -0.047***<br>(0.0103) | 0.005<br>(0.0116)     |
| Sigma constant                               |                       | 1.179***<br>(0.0134)  |                       | 0.810***<br>(0.0135)  |                       | 0.698***<br>(0.0325)  |                       | 0.841***<br>(0.0134)  |                       | 0.891***<br>(0.0166)  |
| Survey year dummies                          | Yes                   |
| District fixed effects                       | Yes                   |
| Observations                                 | 9479                  | 4993                  | 9479                  | 2737                  | 9479                  | 236                   | 9479                  | 3703                  | 9479                  | 1400                  |

Standard errors in parentheses; \*  $p < 0.10$ , \*\*  $p < 0.05$ , \*\*\*  $p < 0.01$

Do rainfall shocks prompt commercial input purchase amongst smallholder farmers in diverse regions and environments in Malawi? Lessons for adaptation

- ✱ **Plotted marginal effects:** Plotting marginal effects showing the relationship between rainfall variables on input purchase decisions in:
  - A. national sample**
  - B. heterogeneous regions,**
  - C. different socioeconomic groups**
  - D. and in Male and female headed households**

A: National sample figures

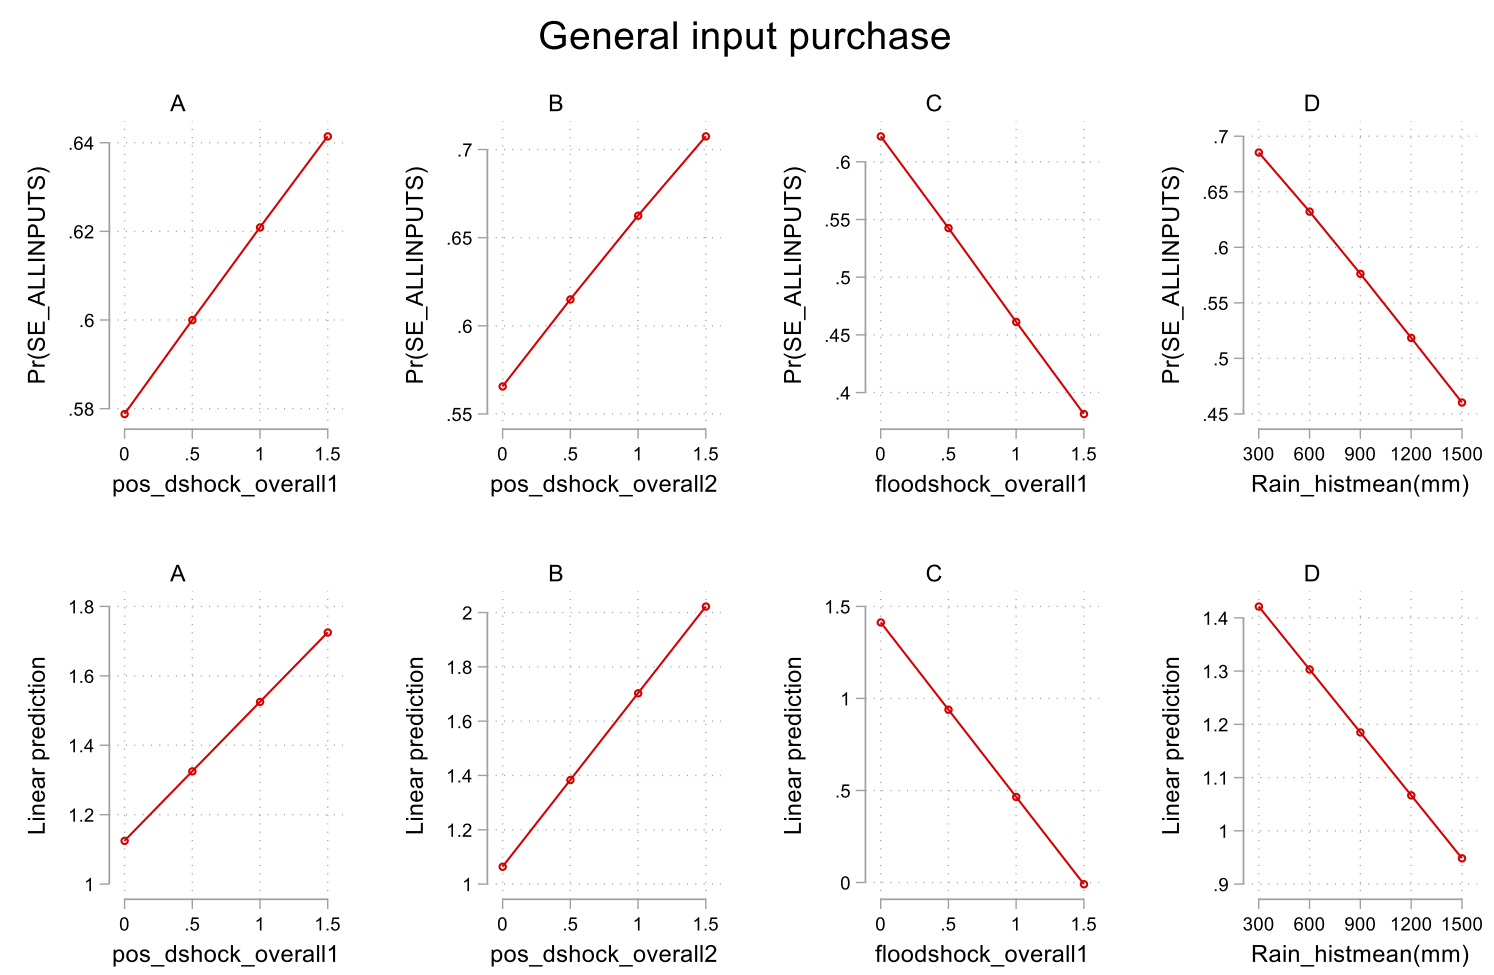

Figure S6: Plotting marginal effects of changes in 1-year lag drought shocks(pos\_dshock\_overall1), 2-year lag drought shock(pos\_dshock\_overall2), 1-year lag flood shock(floodshock\_overall1), and historical mean rainfall(Rain\_histmean(mm)) on the probability (top panel), and intensity of input purchase (bottom panel) in the national sample.

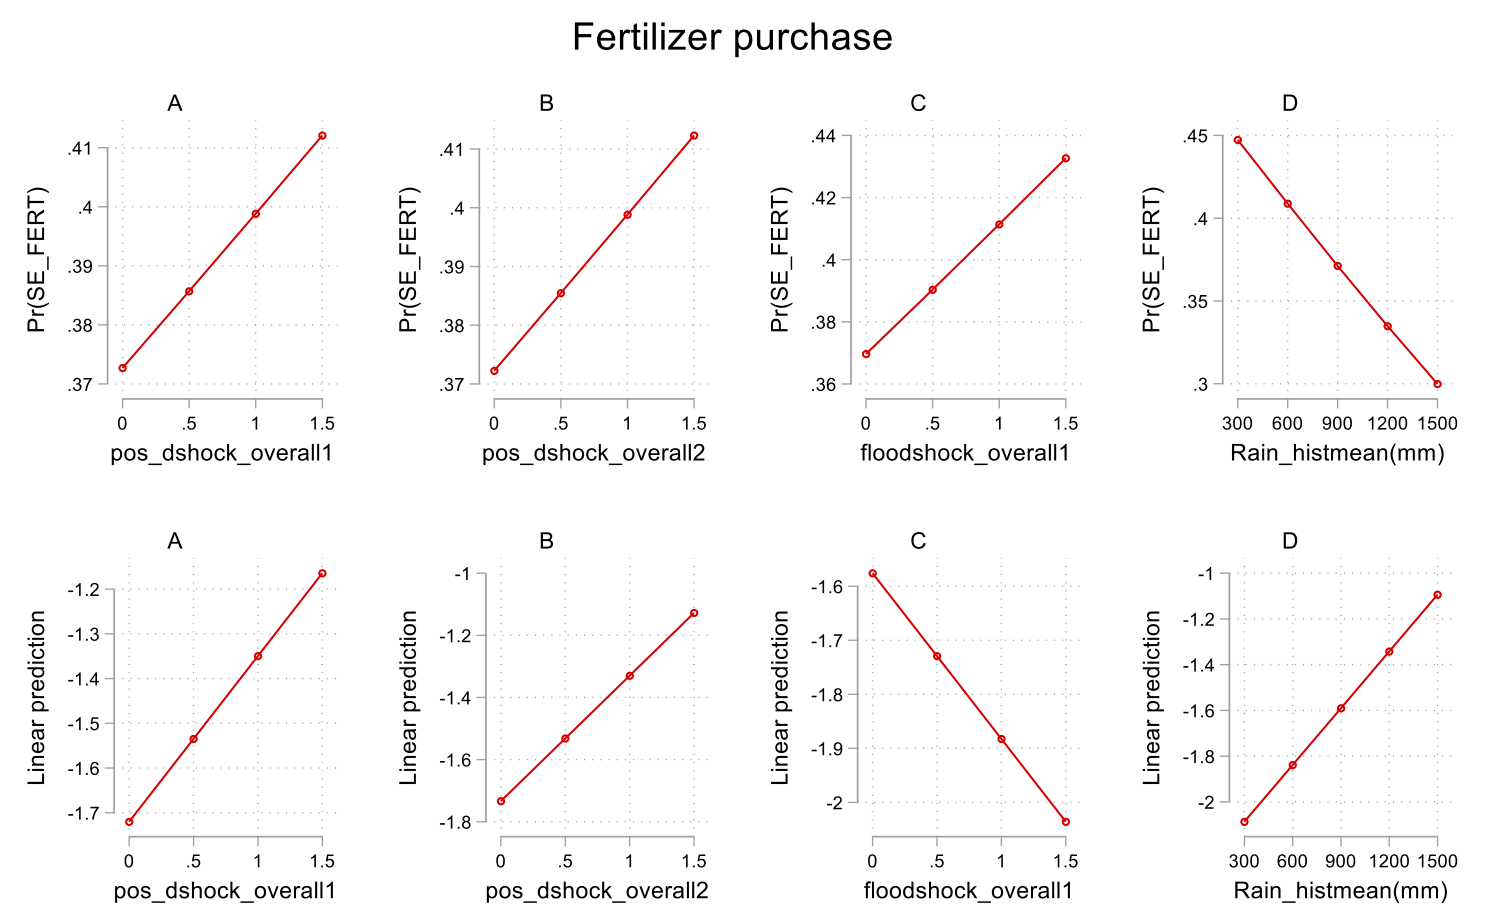

Figure S7: Plotting marginal effects of changes in 1-year lag drought shocks(pos\_dshock\_overall1), 2-year lag drought shock(pos\_dshock\_overall2), 1-year lag flood shock(floodshock\_overall1), and historical mean rainfall(Rain\_histmean(mm)) on the probability (top panel), and intensity of input purchase (bottom panel) in the national sample.



Do rainfall shocks prompt commercial input purchase amongst smallholder farmers in diverse regions and environments in Malawi? Lessons for adaptation

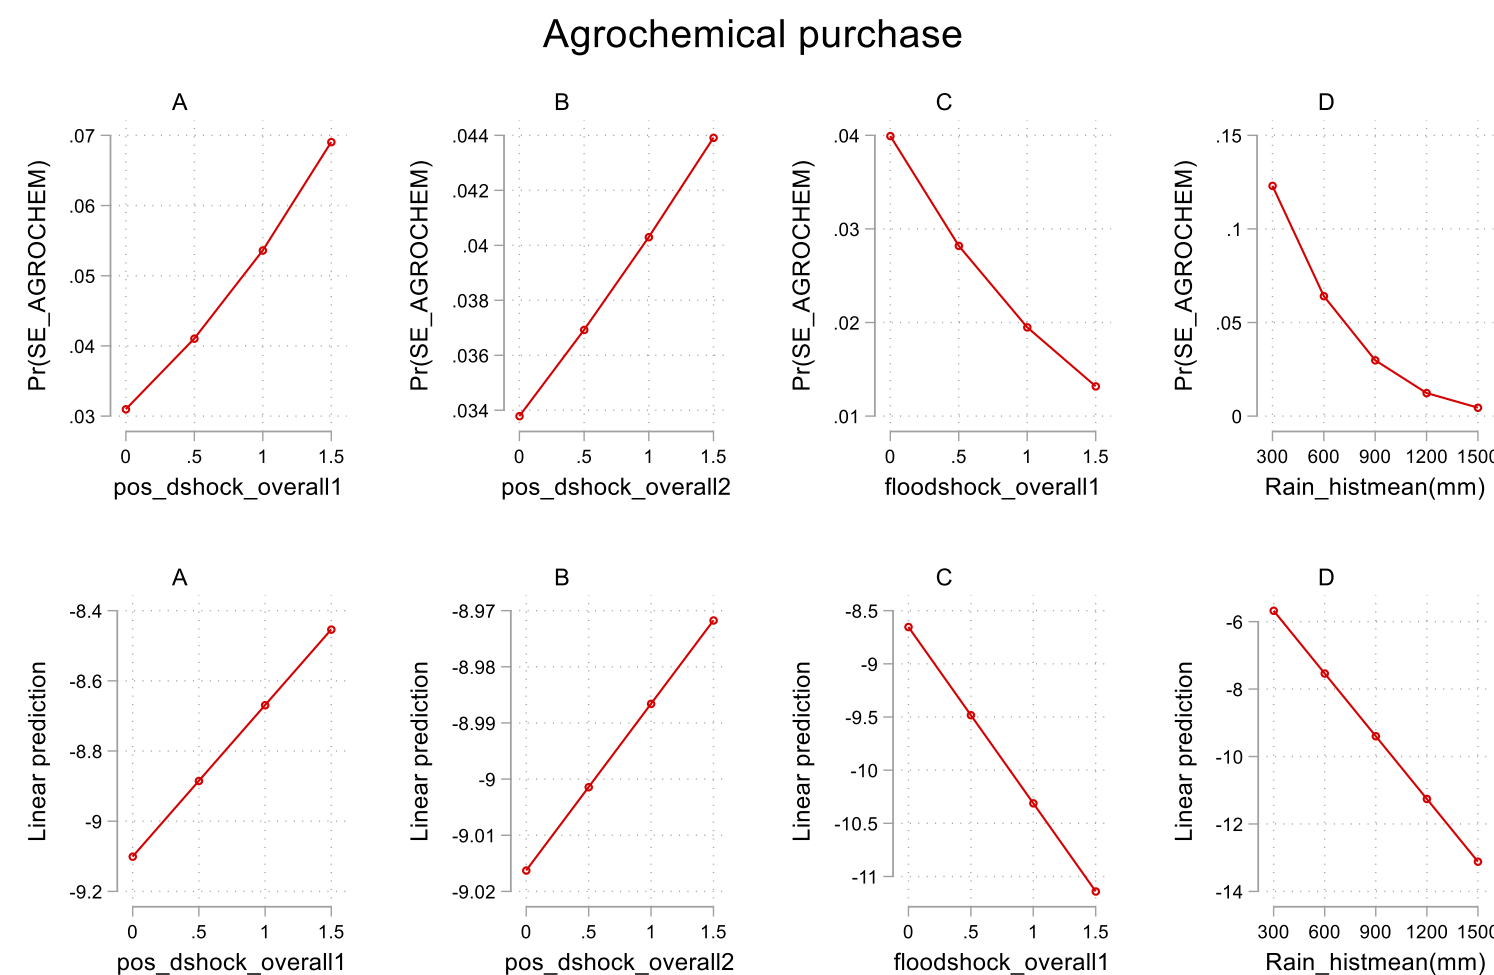

Figure S8: Plotting marginal effects of changes in 1-year lag drought shocks(pos\_dshock\_overall1), 2-year lag drought shock(pos\_dshock\_overall2), 1-year lag flood shock(floodshock\_overall1), and historical mean rainfall(Rain\_histmean(mm)) on the probability (top panel), and intensity of input purchase (bottom panel) in the national sample.

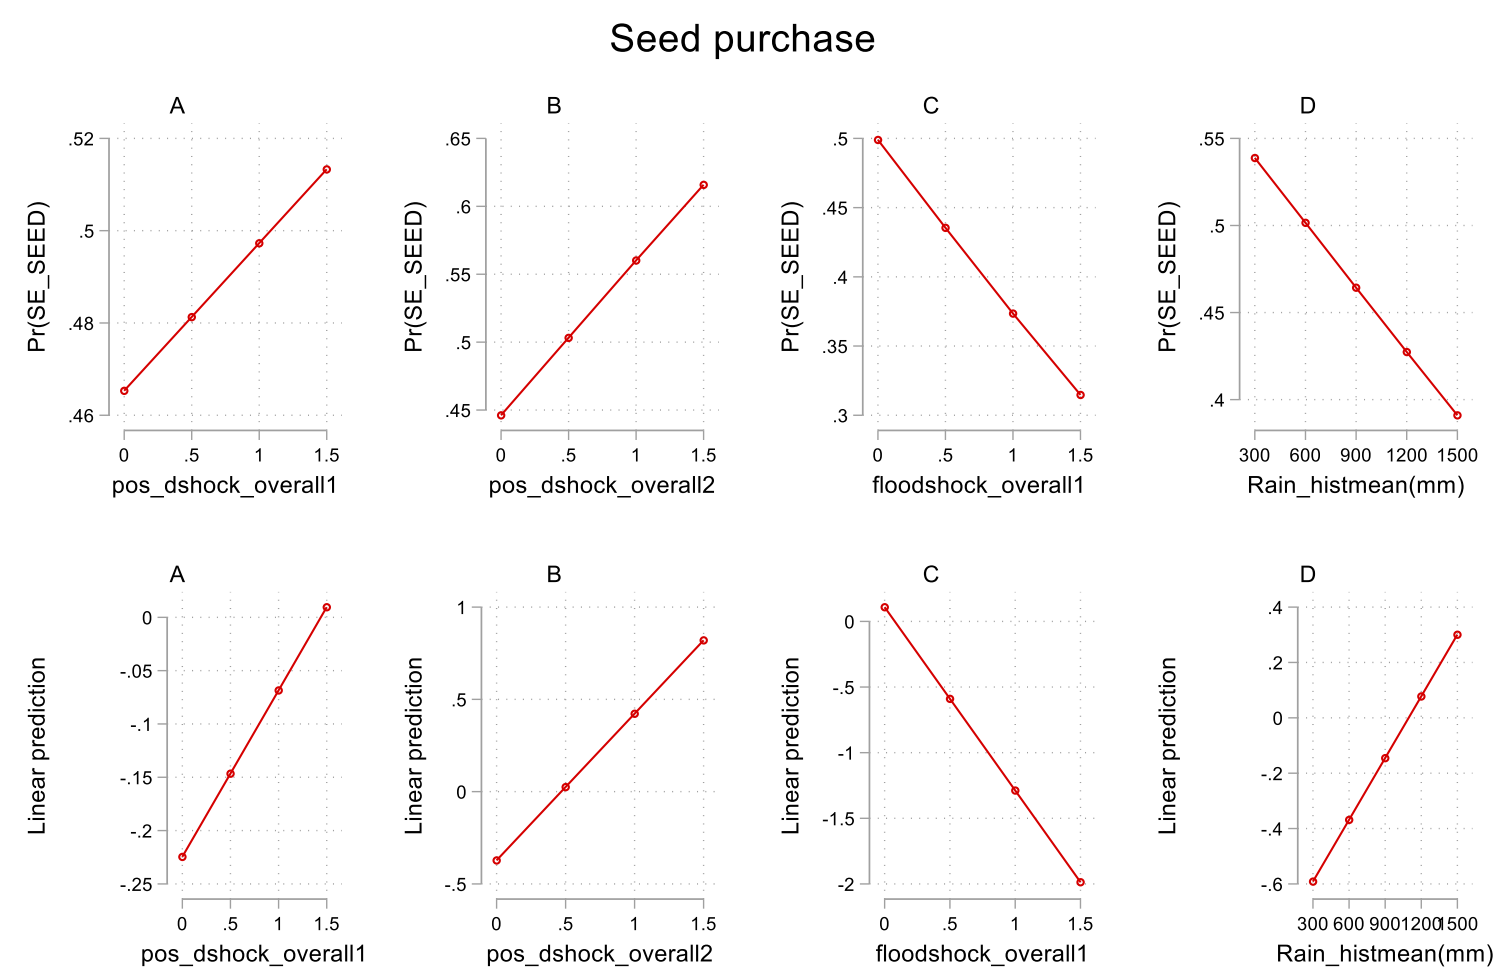

Figure S9: Plotting marginal effects of changes in 1-year lag drought shocks(pos\_dshock\_overall1), 2-year lag drought shock(pos\_dshock\_overall2), 1-year lag flood shock(floodshock\_overall1), and historical mean rainfall(Rain\_histmean(mm)) on the probability (top panel), and intensity of input purchase (bottom panel) in the national sample.

Do rainfall shocks prompt commercial input purchase amongst smallholder farmers in diverse regions and environments in Malawi? Lessons for adaptation

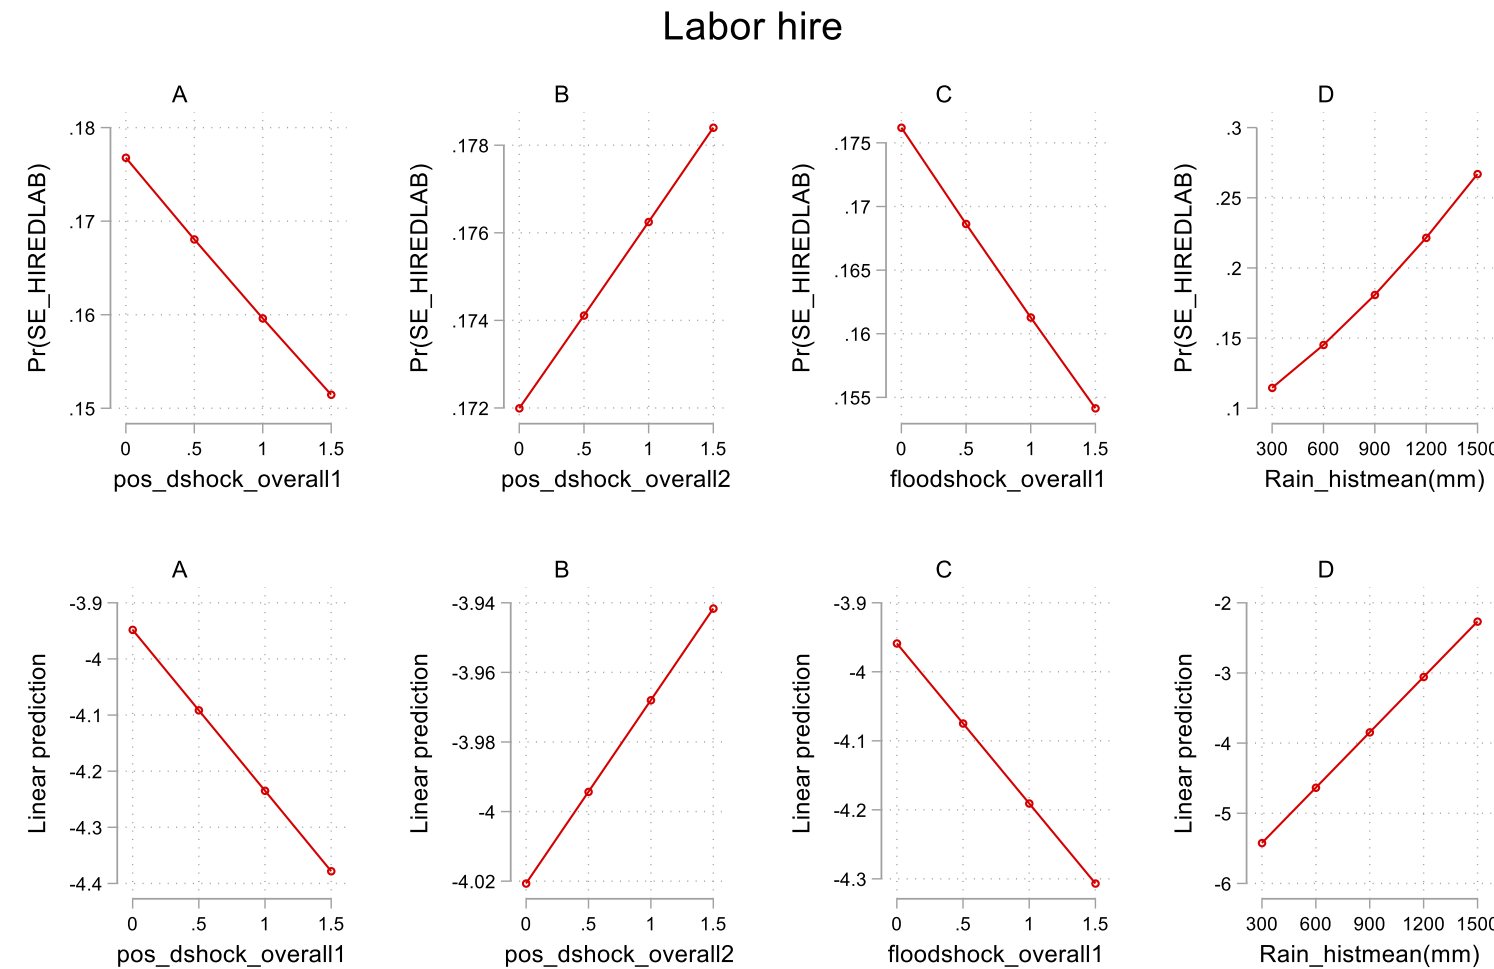

B: Heterogeneity: Regional figures

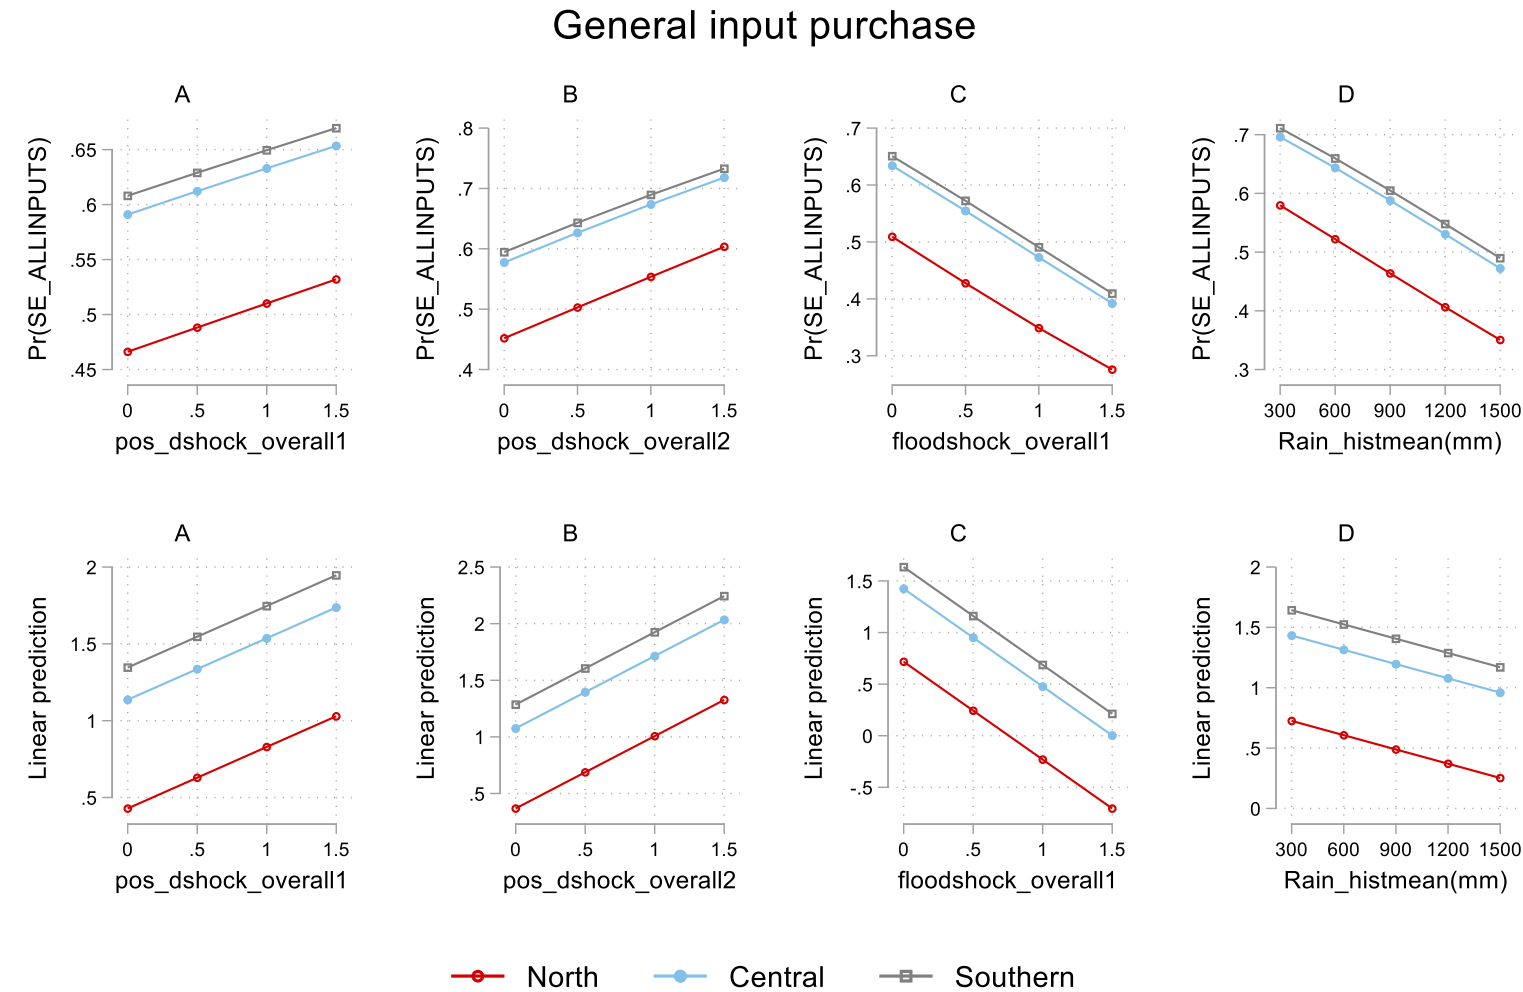

Figure S11: Plotting marginal effects of changes in 1-year lag drought shocks( $\text{pos\_dshock\_overall1}$ ), 2-year lag drought shock( $\text{pos\_dshock\_overall2}$ ), 1-year lag flood shock( $\text{floodshock\_overall1}$ ), and historical mean rainfall( $\text{Rain\_histmean(mm)}$ ) on the probability (top panel), and intensity of input purchase (bottom panel) by region.



Do rainfall shocks prompt commercial input purchase amongst smallholder farmers in diverse regions and environments in Malawi? Lessons for adaptation

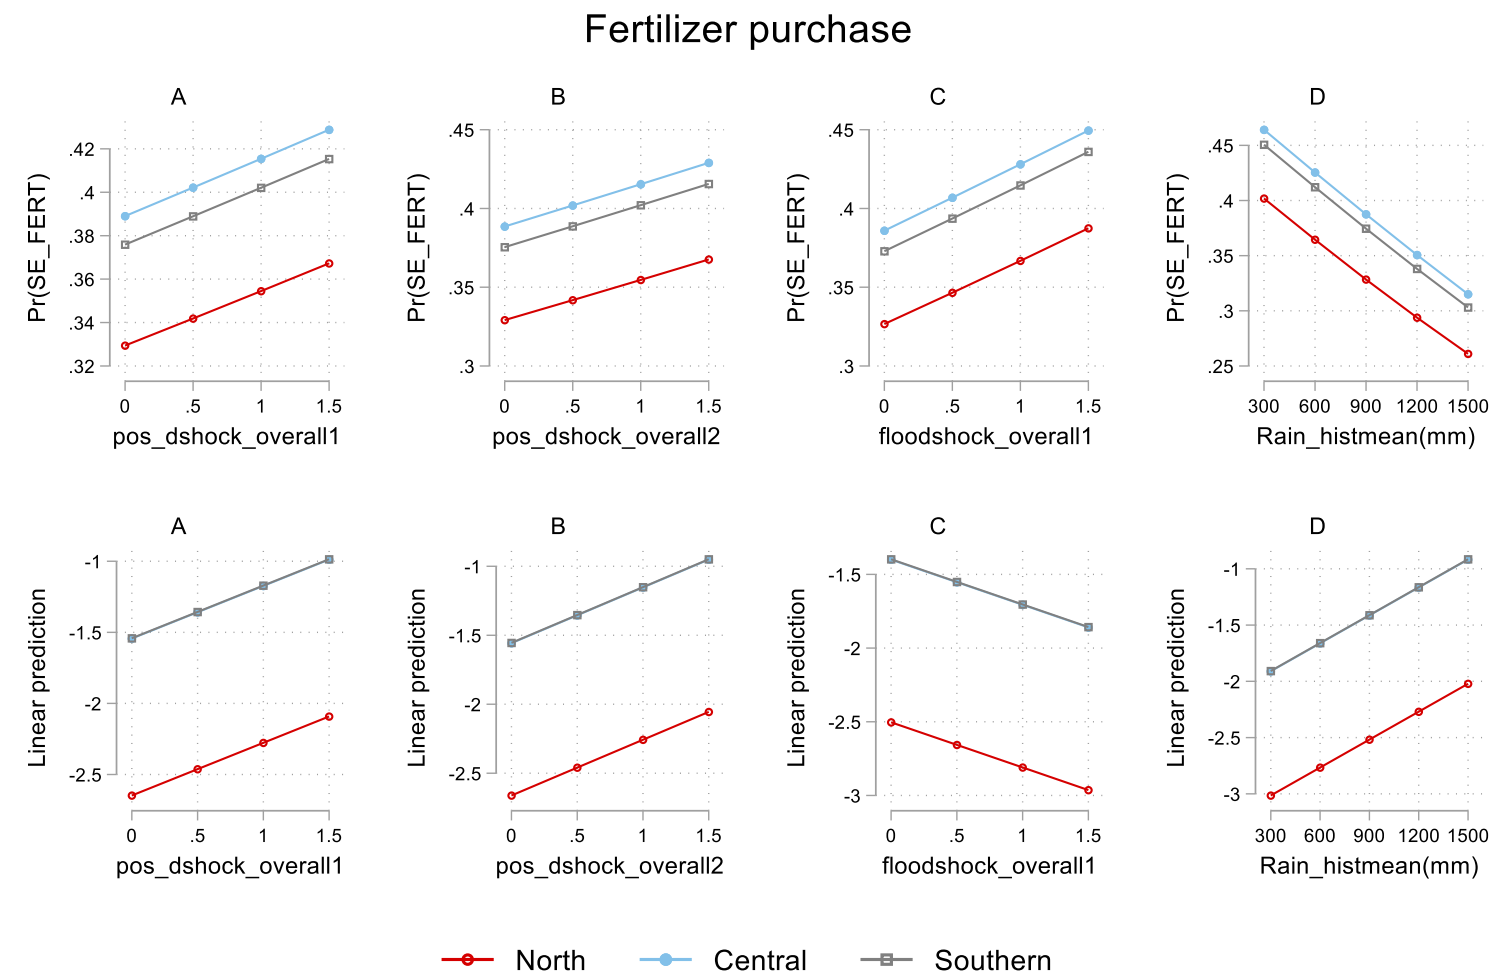

Figure S12: Plotting marginal effects of changes in 1-year lag drought shocks( $\text{pos\_dshock\_overall1}$ ), 2-year lag drought shock( $\text{pos\_dshock\_overall2}$ ), 1-year lag flood shock( $\text{floodshock\_overall1}$ ), and historical mean rainfall( $\text{Rain\_histmean(mm)}$ ) on the probability (top panel), and intensity of Fertilizer purchase (bottom panel) by region.

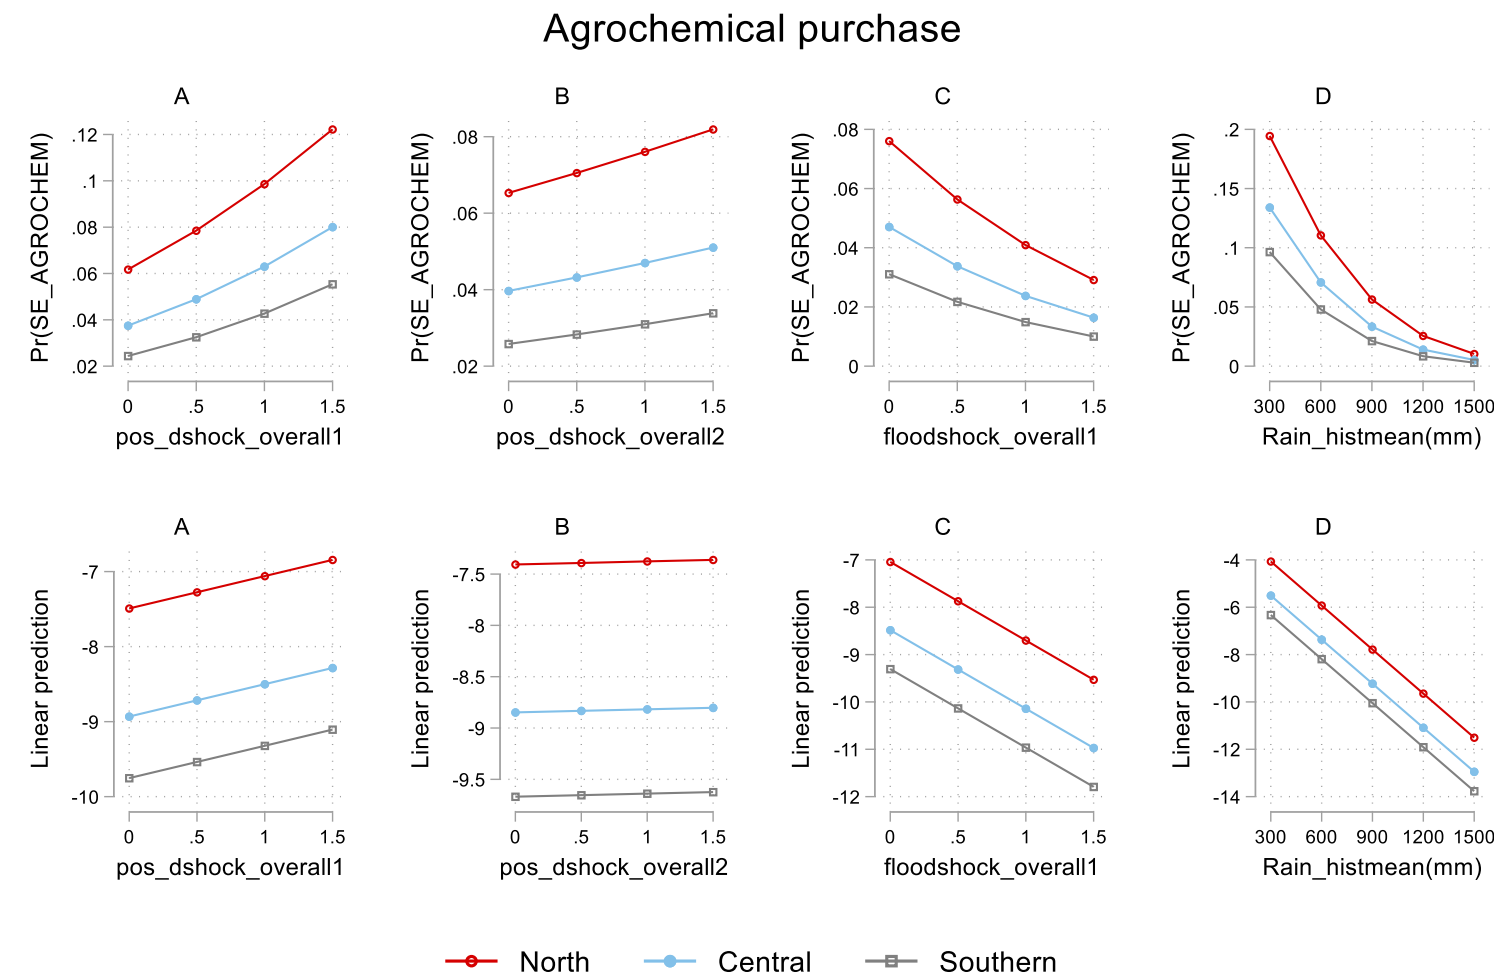

Figure S13: Plotting marginal effects of changes in 1-year lag drought shocks( $\text{pos\_dshock\_overall1}$ ), 2-year lag drought shock( $\text{pos\_dshock\_overall2}$ ), 1-year lag flood shock( $\text{floodshock\_overall1}$ ), and historical mean rainfall( $\text{Rain\_histmean(mm)}$ ) on the probability (top panel), and intensity of Agrochemical purchase (bottom panel) by region.

Do rainfall shocks prompt commercial input purchase amongst smallholder farmers in diverse regions and environments in Malawi? Lessons for adaptation

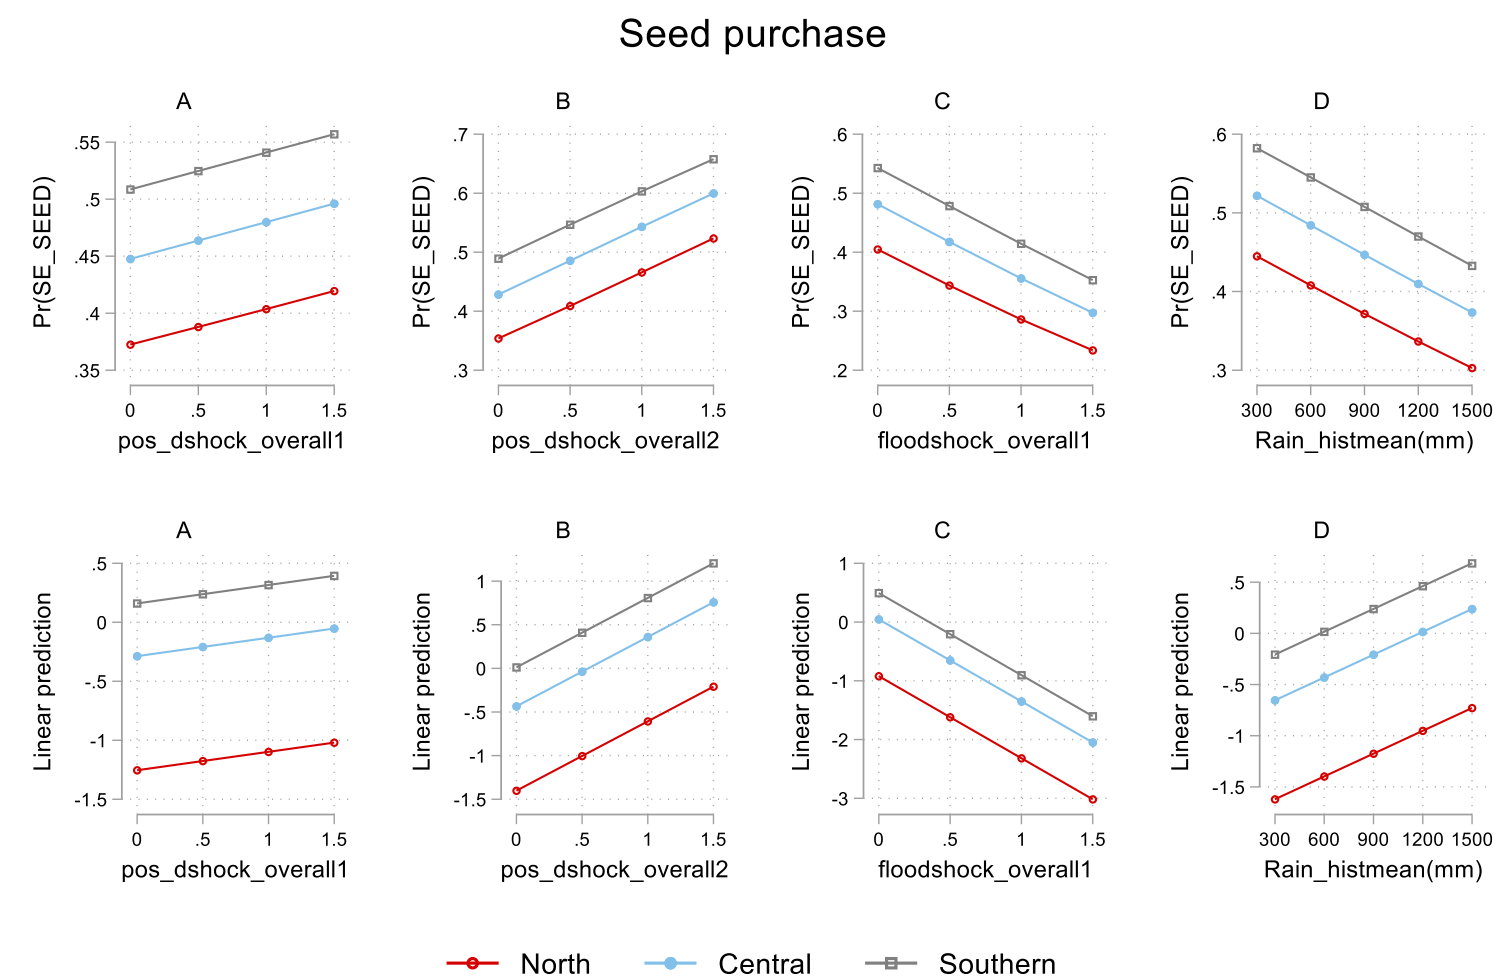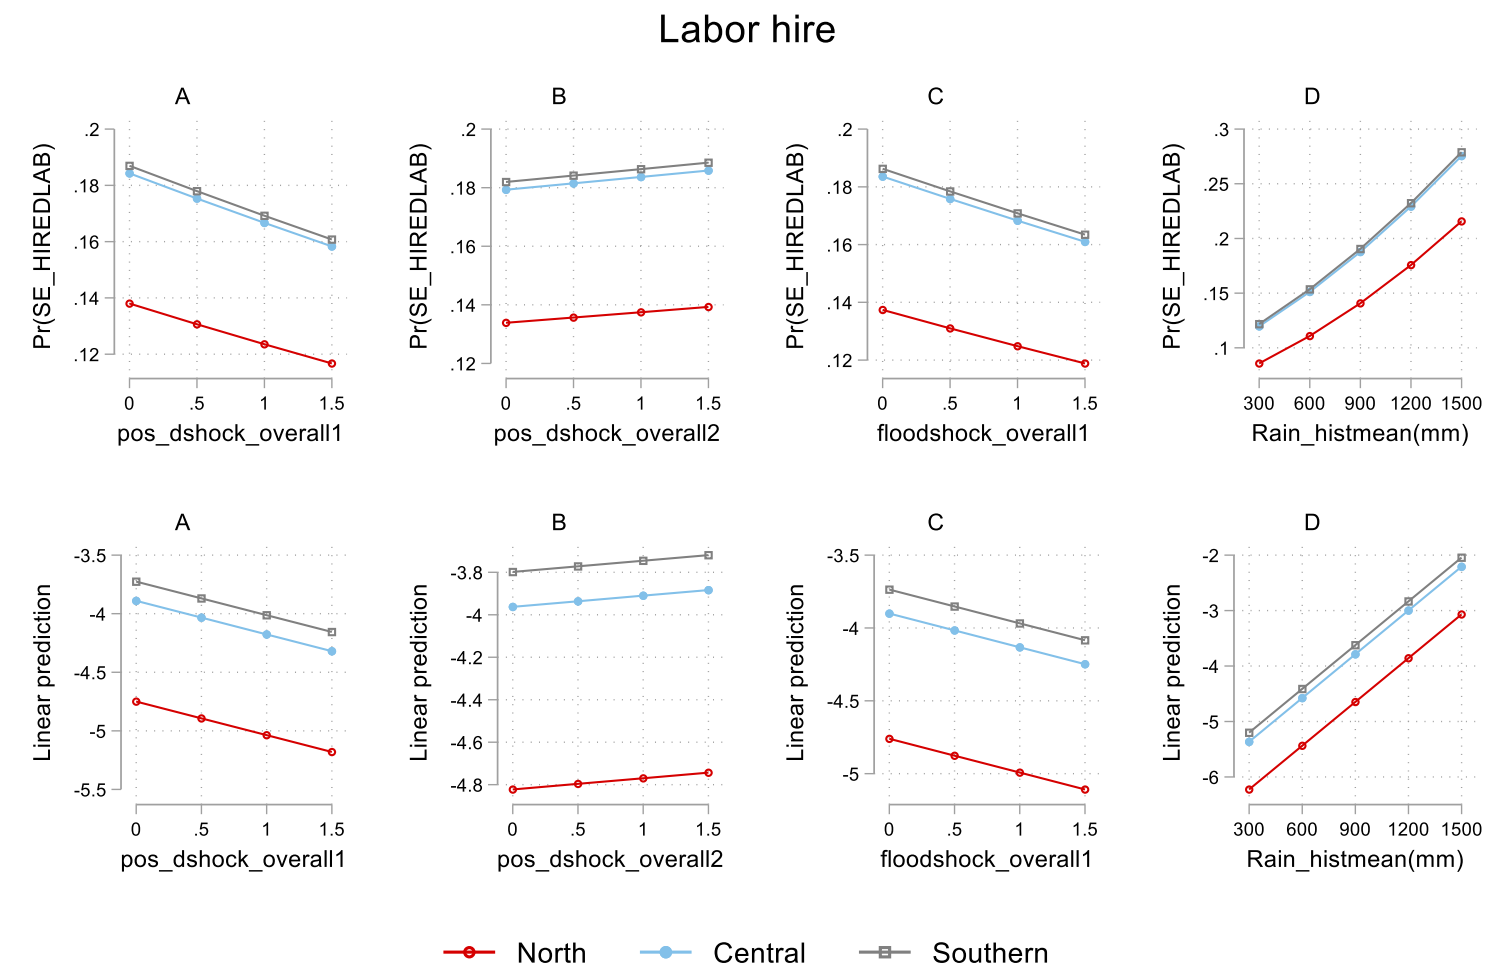

Do rainfall shocks prompt commercial input purchase amongst smallholder farmers in diverse regions and environments in Malawi? Lessons for adaptation

C: Heterogeneity: Adaptive capacity(asset endowements) figures

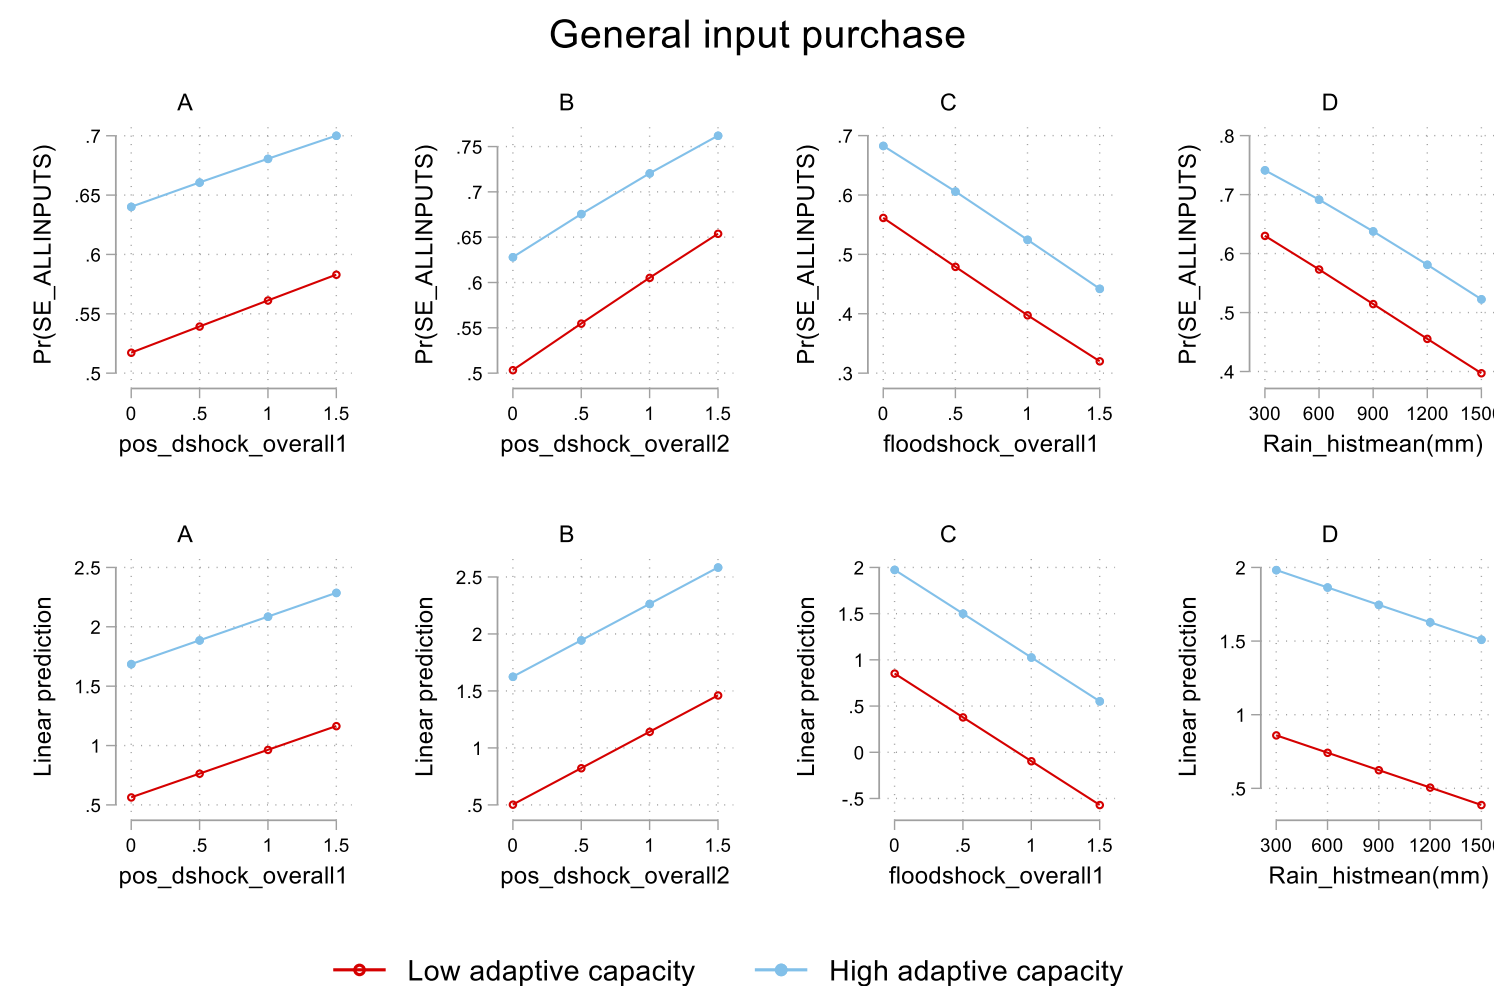

Figure S16: Plotting marginal effects of changes in 1-year lag drought shocks(pos\_dshock\_overall1), 2-year lag drought shock(pos\_dshock\_overall2), 1-year lag flood shock(floodshock\_overall1), and historical mean rainfall(Rain\_histmean(mm)) on the probability (top panel), and intensity of input purchase (bottom panel) by adaptive capacity.

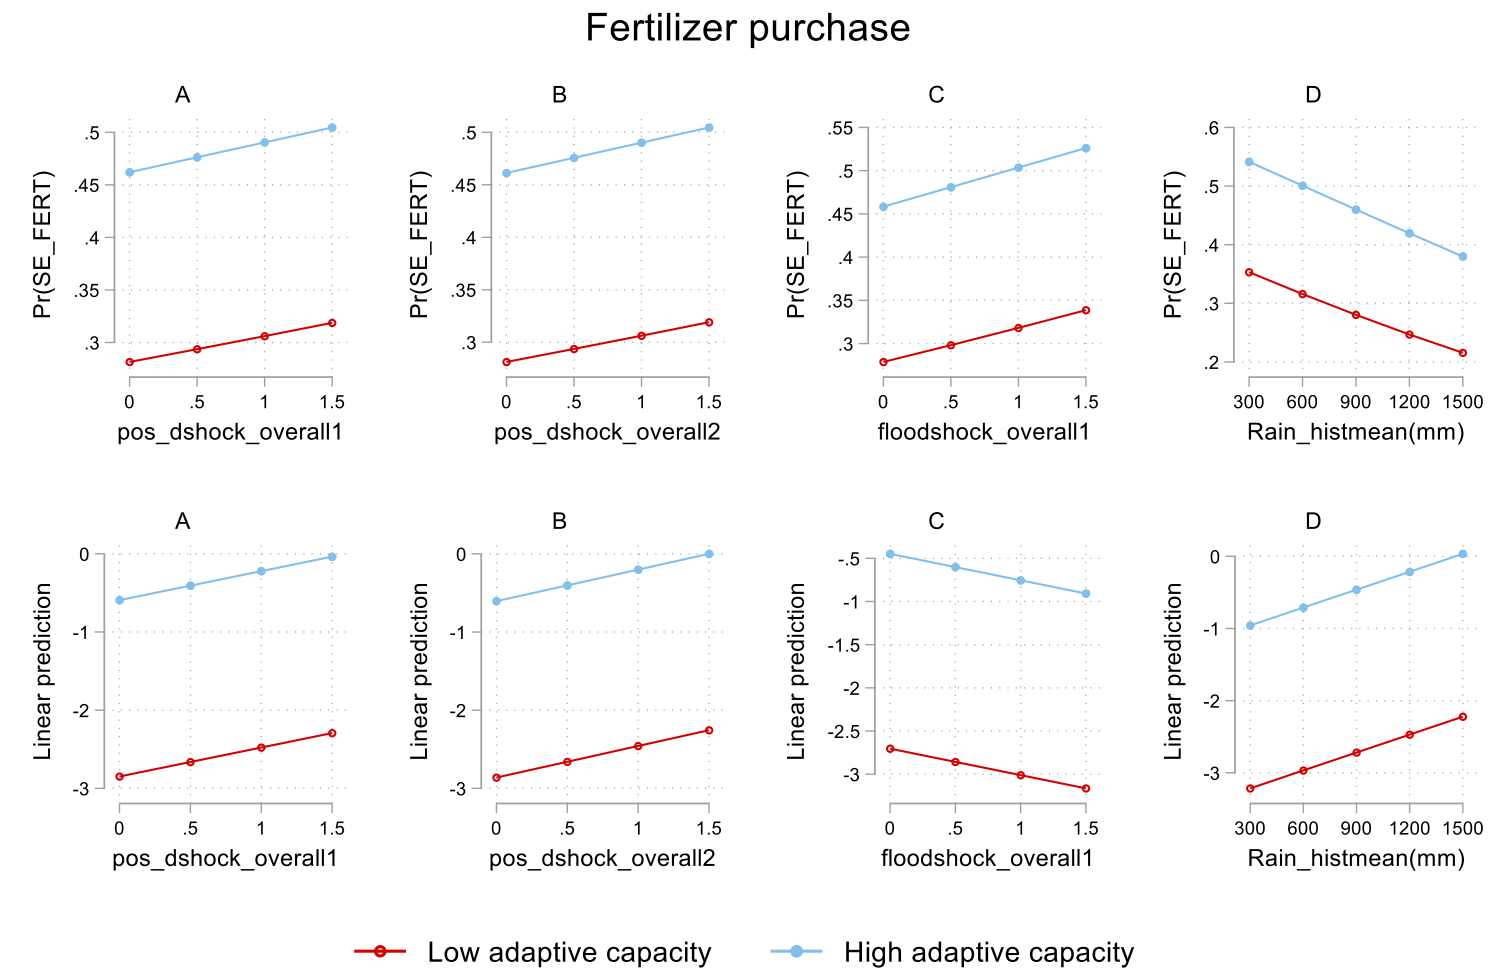

Figure S17: Plotting marginal effects of changes in 1-year lag drought shocks(pos\_dshock\_overall1), 2-year lag drought shock(pos\_dshock\_overall2), 1-year lag flood shock(floodshock\_overall1), and historical mean rainfall(Rain\_histmean(mm)) on the probability (top panel), and intensity of input purchase (bottom panel) by adaptive capacity.

Do rainfall shocks prompt commercial input purchase amongst smallholder farmers in diverse regions and environments in Malawi? Lessons for adaptation

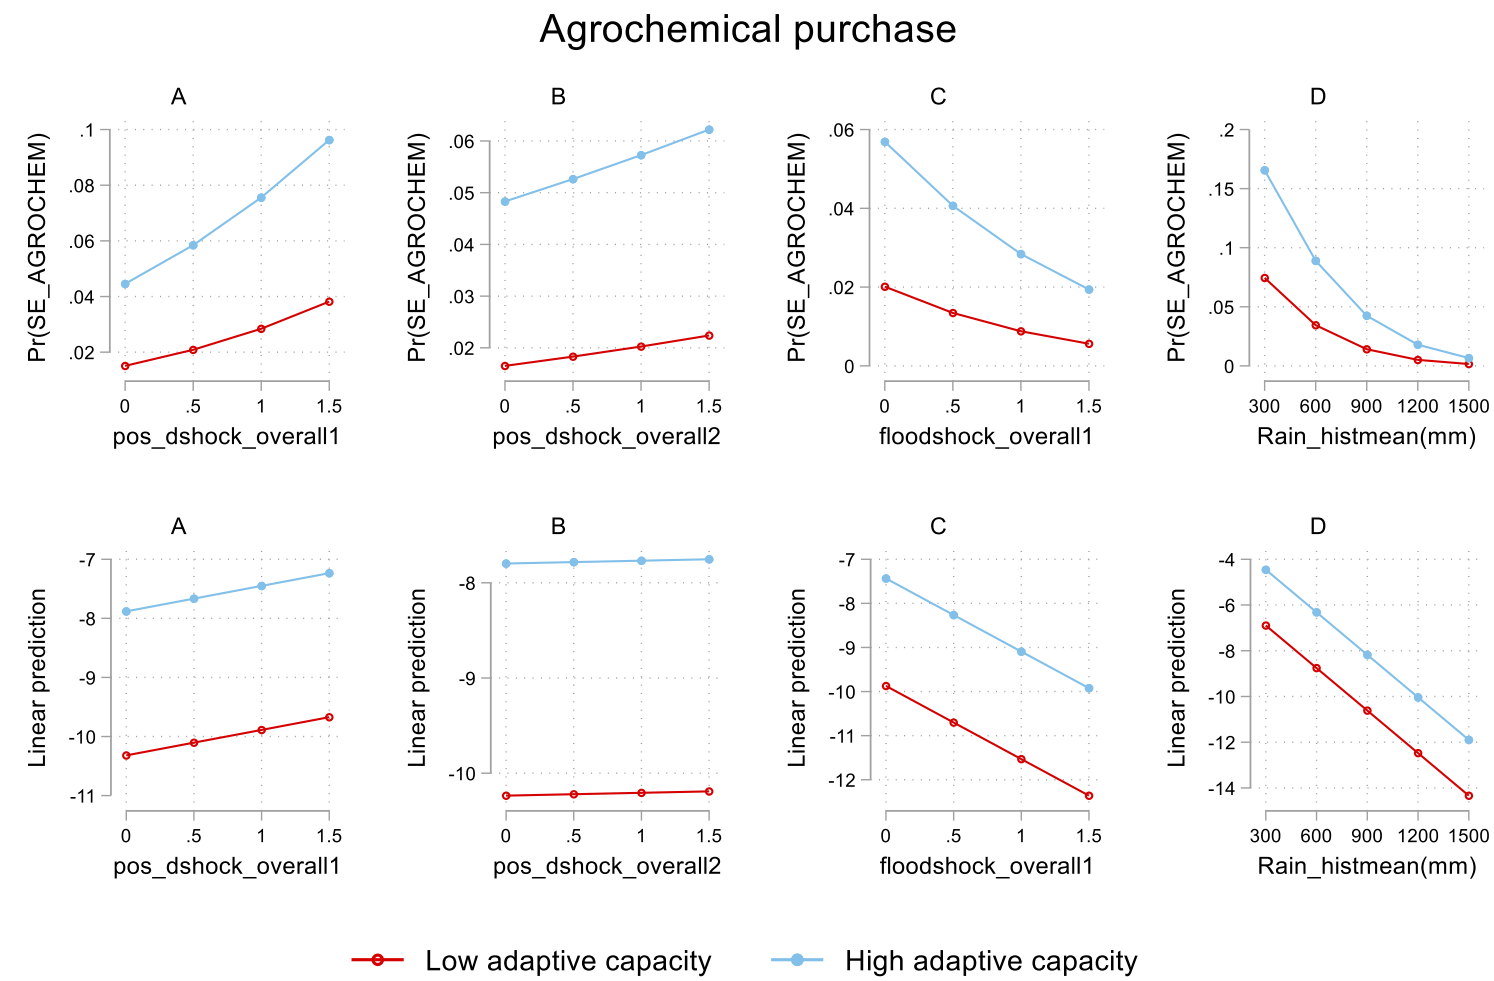

Figure S18: Plotting marginal effects of changes in 1-year lag drought shocks( $\text{pos\_dshock\_overall1}$ ), 2-year lag drought shock( $\text{pos\_dshock\_overall2}$ ), 1-year lag flood shock( $\text{floodshock\_overall1}$ ), and historical mean rainfall( $\text{Rain\_histmean(mm)}$ ) on the probability (top panel), and intensity of input purchase (bottom panel) by adaptive capacity.

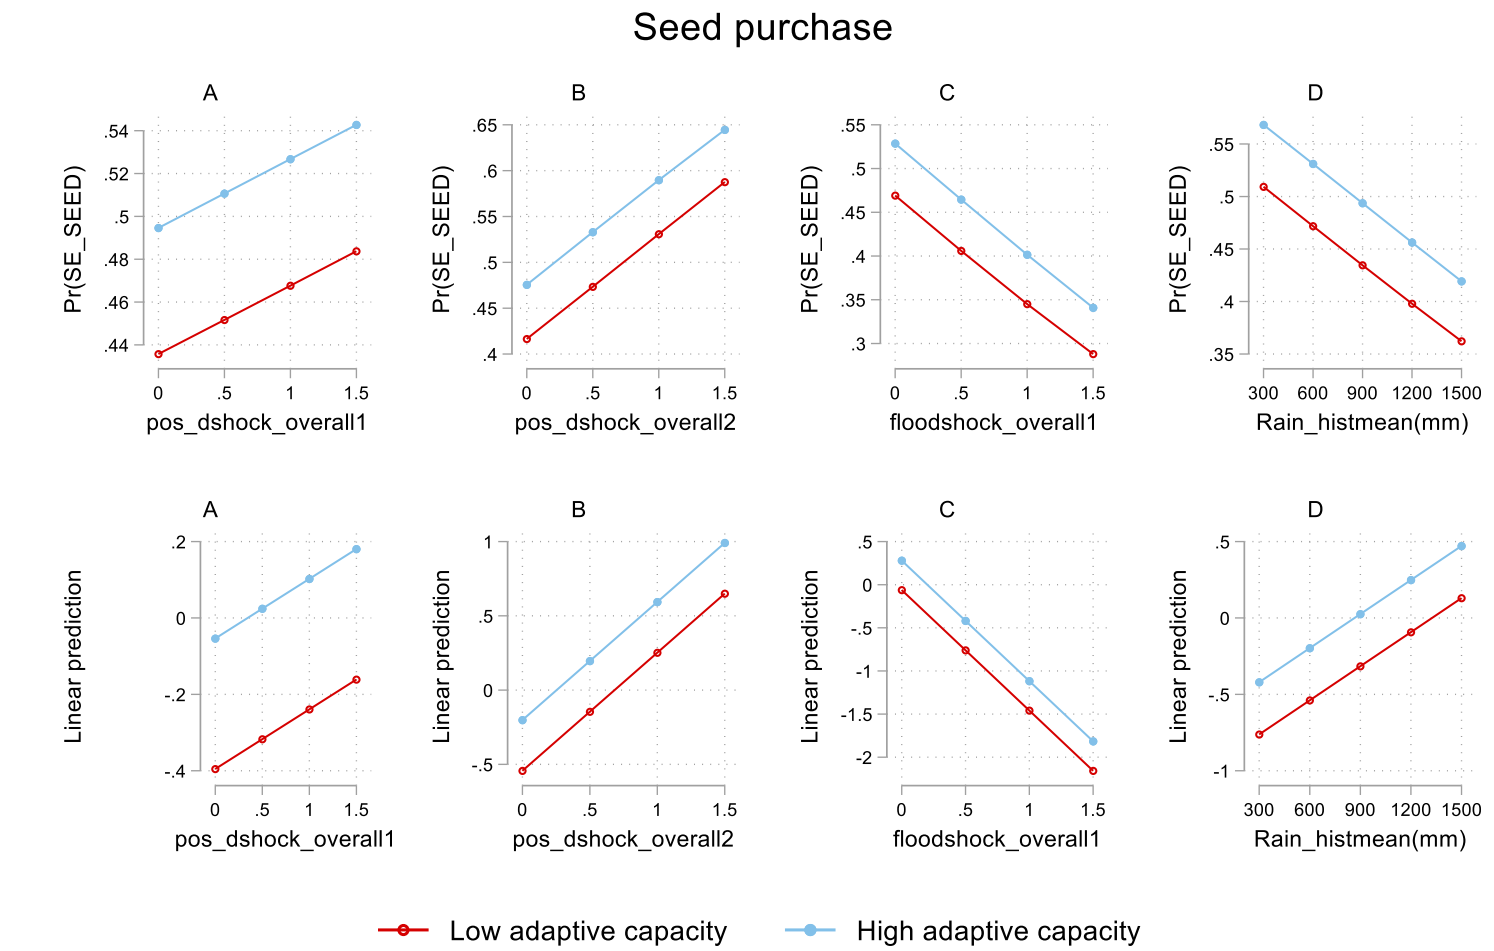

Figure S19: Plotting marginal effects of changes in 1-year lag drought shocks( $\text{pos\_dshock\_overall1}$ ), 2-year lag drought shock( $\text{pos\_dshock\_overall2}$ ), 1-year lag flood shock( $\text{floodshock\_overall1}$ ), and historical mean rainfall( $\text{Rain\_histmean(mm)}$ ) on the probability (top panel), and intensity of input purchase (bottom panel) by adaptive capacity.

Do rainfall shocks prompt commercial input purchase amongst smallholder farmers in diverse regions and environments in Malawi? Lessons for adaptation

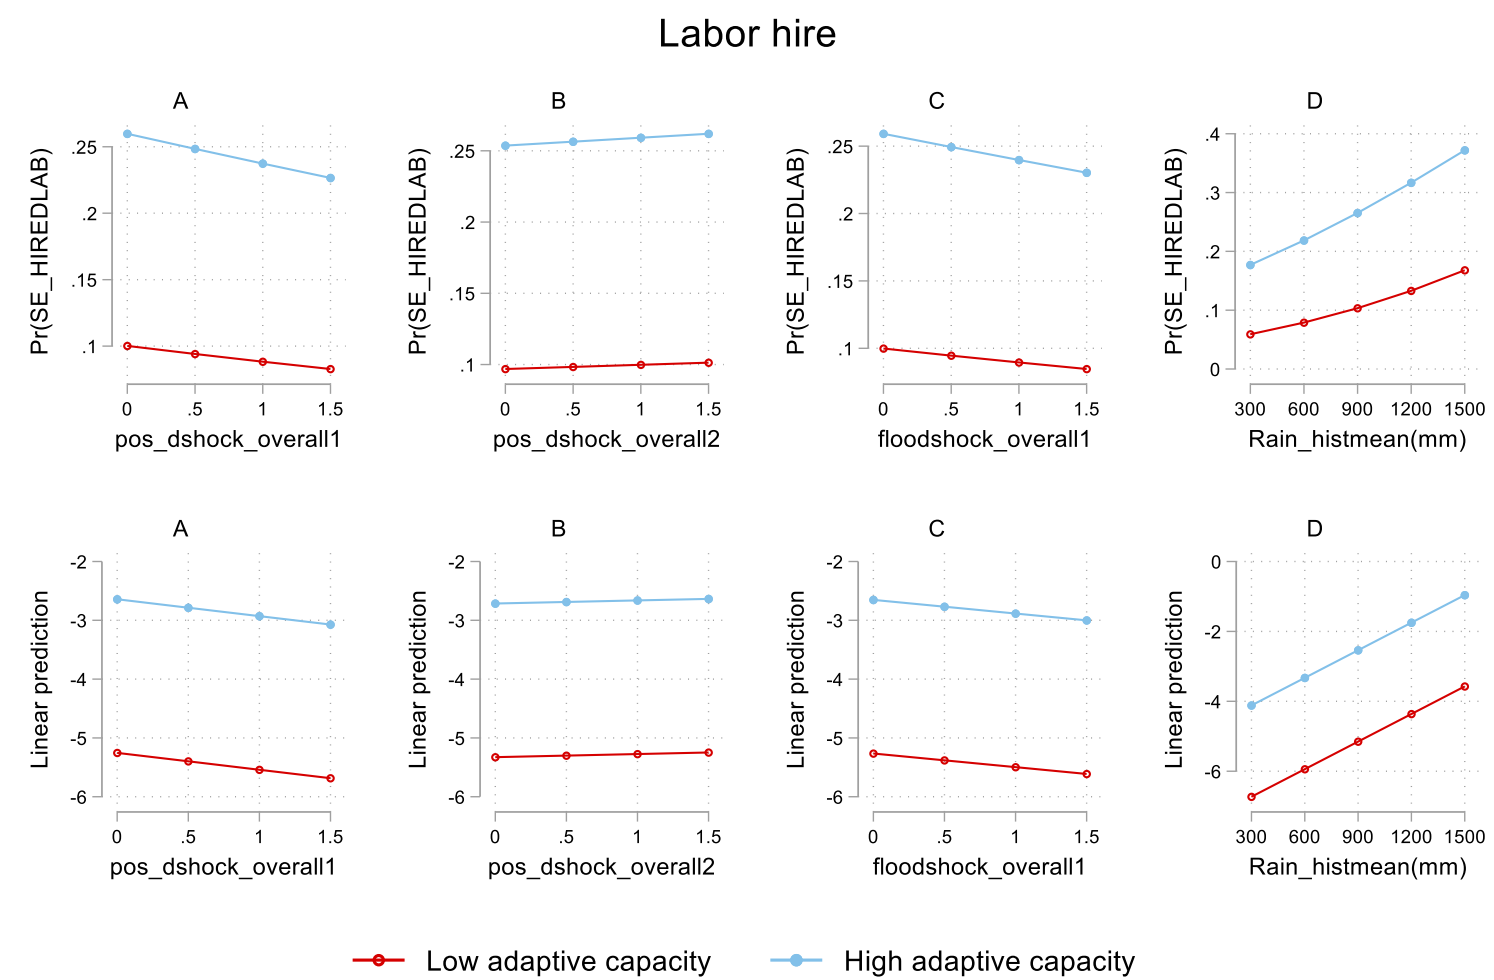

Figure S20: Plotting marginal effects of changes in 1-year lag drought shocks( $\text{pos\_dshock\_overall1}$ ), 2-year lag drought shock( $\text{pos\_dshock\_overall2}$ ), 1-year lag flood shock( $\text{floodshock\_overall1}$ ), and historical mean rainfall( $\text{Rain\_histmean(mm)}$ ) on the probability (top panel), and intensity of input purchase (bottom panel) by adaptive capacity.

D: Heterogeneity: Gender Figures

- Female single-headed family vs. Male headed family

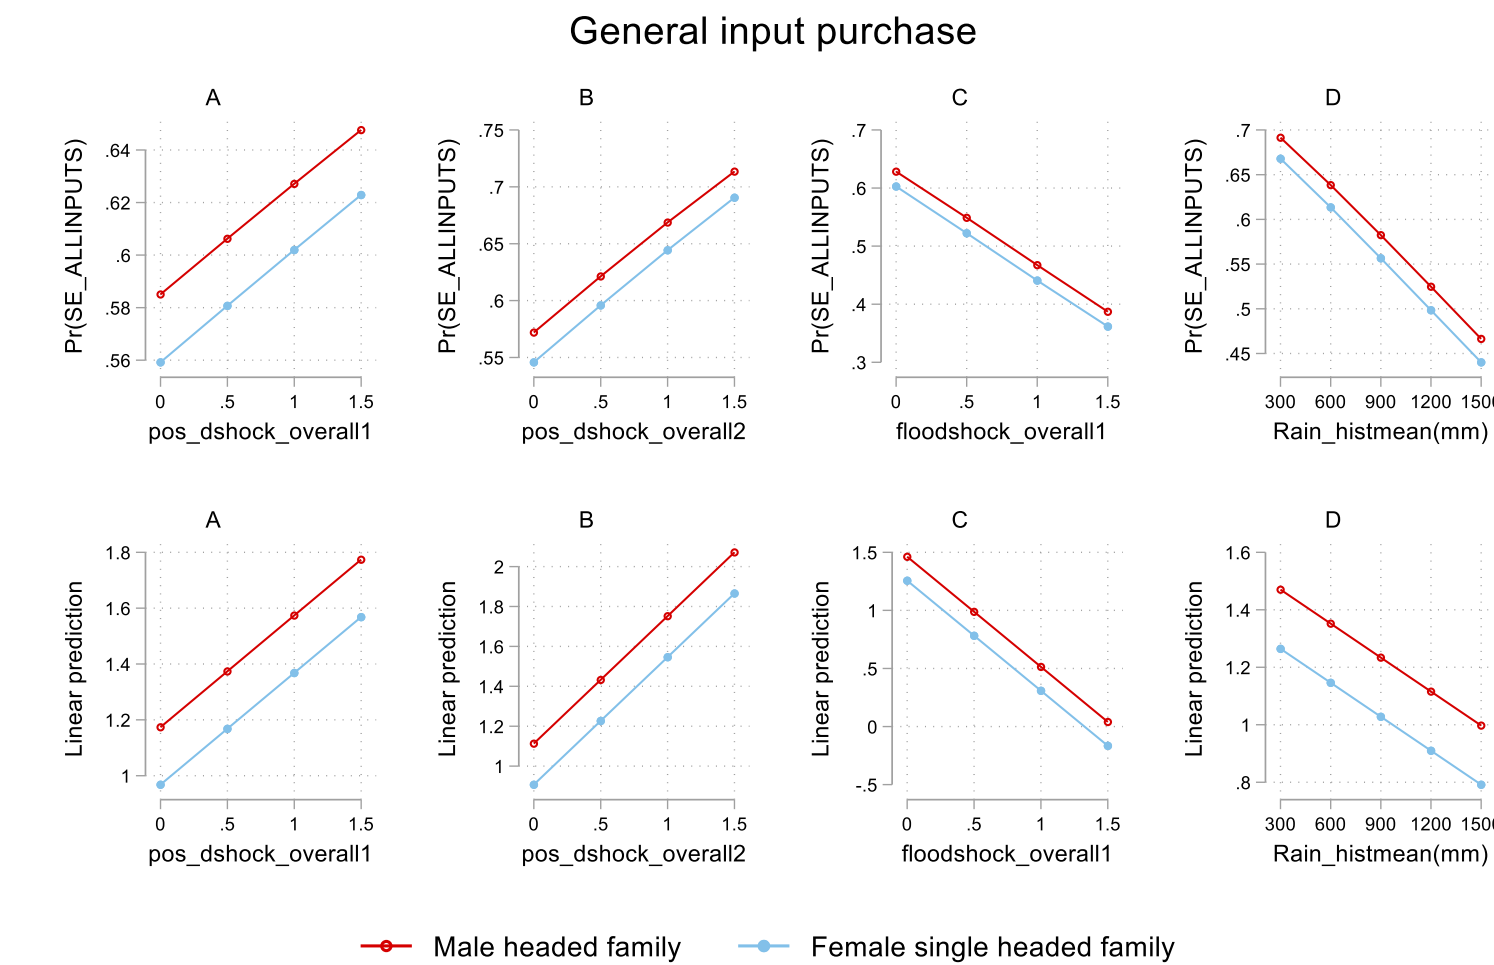

Figure S21: Plotting marginal effects of changes in 1-year lag drought shocks( $\text{pos\_dshock\_overall1}$ ), 2-year lag drought shock( $\text{pos\_dshock\_overall2}$ ), 1-year lag flood shock( $\text{floodshock\_overall1}$ ), and historical mean rainfall( $\text{Rain\_histmean(mm)}$ ) on the probability (top panel), and intensity of input purchase (bottom panel) by gender.

Do rainfall shocks prompt commercial input purchase amongst smallholder farmers in diverse regions and environments in Malawi? Lessons for adaptation

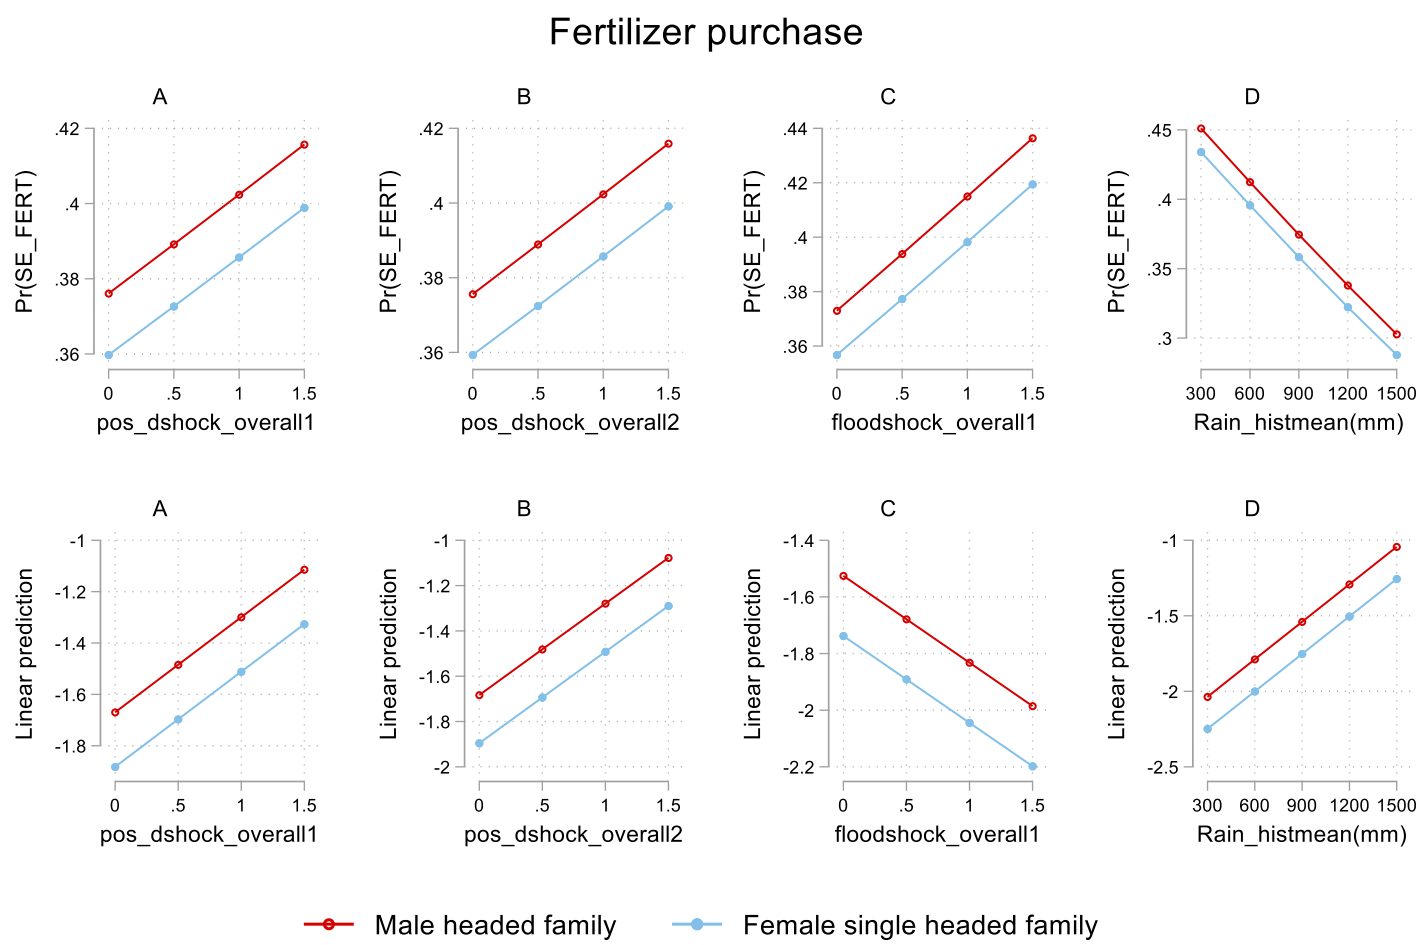

Figure S22: Plotting marginal effects of changes in 1-year lag drought shocks(pos\_dshock\_overall1), 2-year lag drought shock(pos\_dshock\_overall2), 1-year lag flood shock(floodshock\_overall1), and historical mean rainfall(Rain\_histmean(mm)) on the probability (top panel), and intensity of input purchase (bottom panel) by gender.

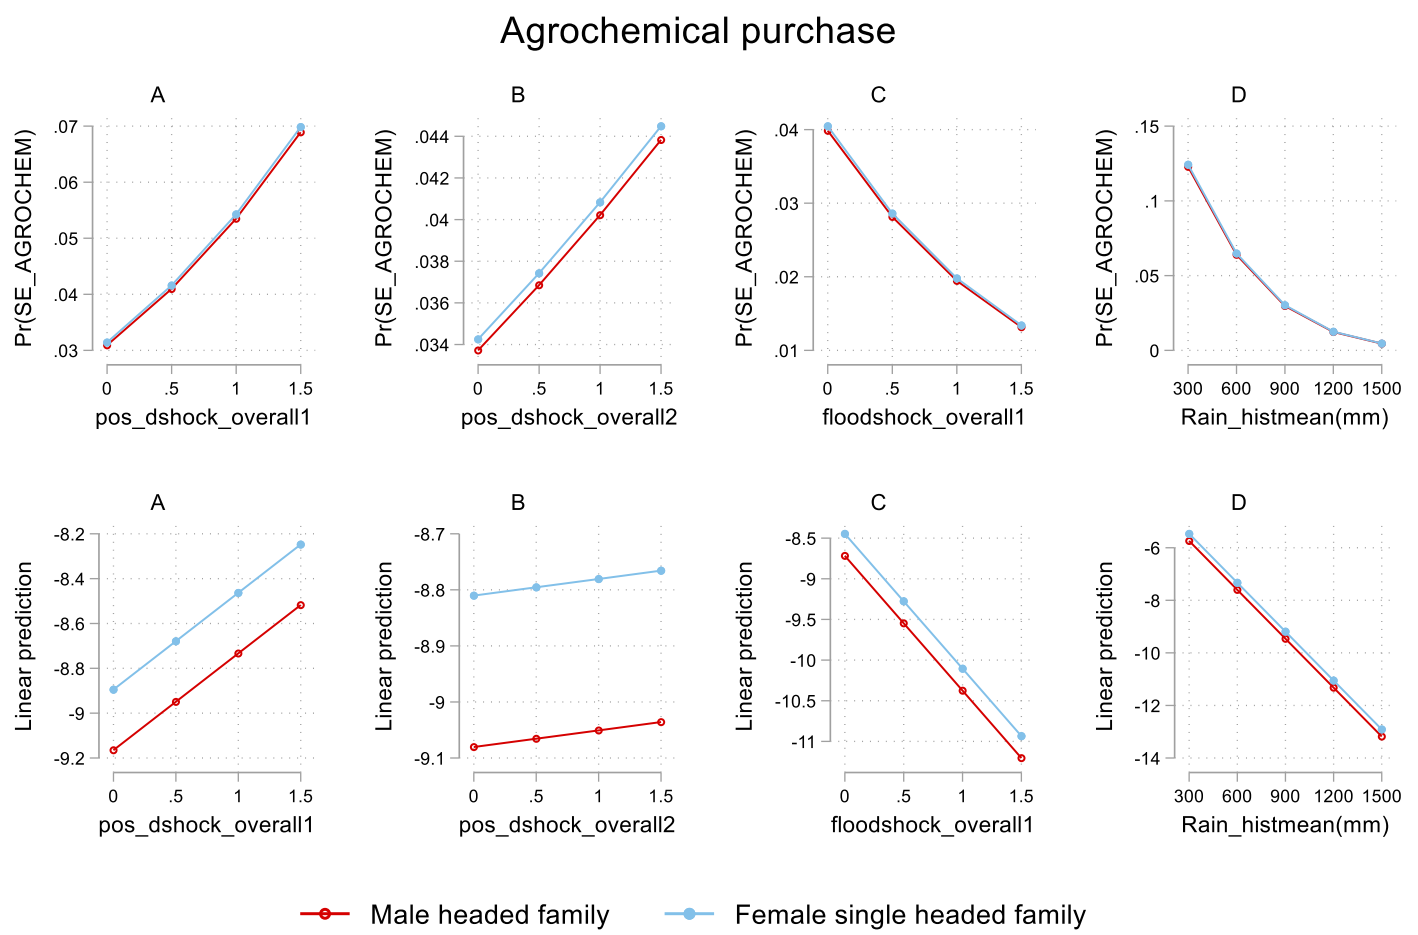

Figure S23: Plotting marginal effects of changes in 1-year lag drought shocks(pos\_dshock\_overall1), 2-year lag drought shock(pos\_dshock\_overall2), 1-year lag flood shock(floodshock\_overall1), and historical mean rainfall(Rain\_histmean(mm)) on the probability (top panel), and intensity of input purchase (bottom panel) by gender.



Do rainfall shocks prompt commercial input purchase amongst smallholder farmers in diverse regions and environments in Malawi? Lessons for adaptation

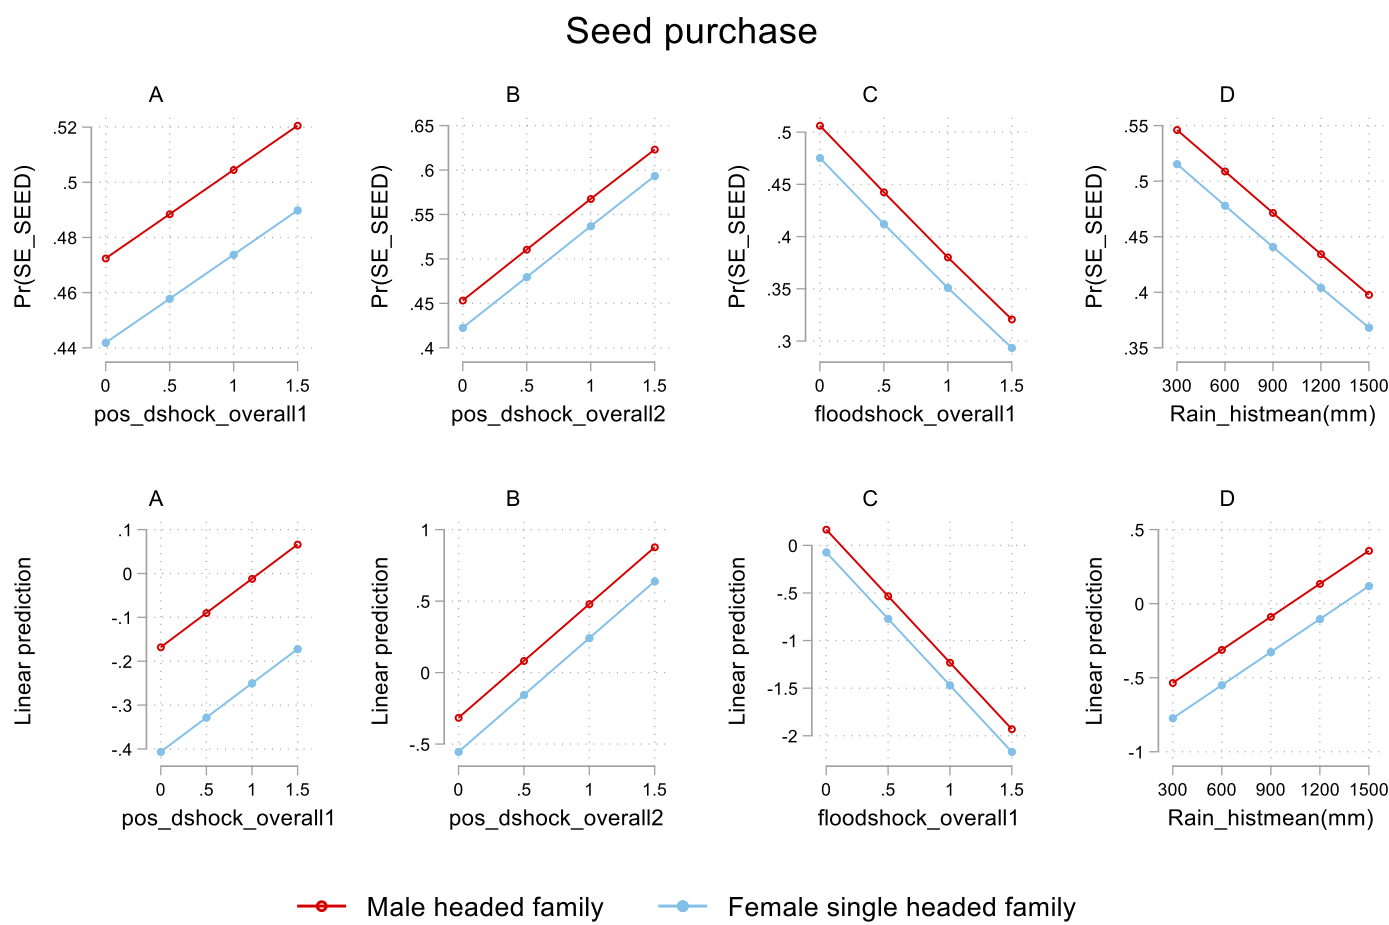

Figure S24: Plotting marginal effects of changes in 1-year lag drought shocks(pos\_dshock\_overall1), 2-year lag drought shock(pos\_dshock\_overall2), 1-year lag flood shock(floodshock\_overall1), and historical mean rainfall(Rain\_histmean(mm)) on the probability (top panel), and intensity of input purchase (bottom panel) by gender.

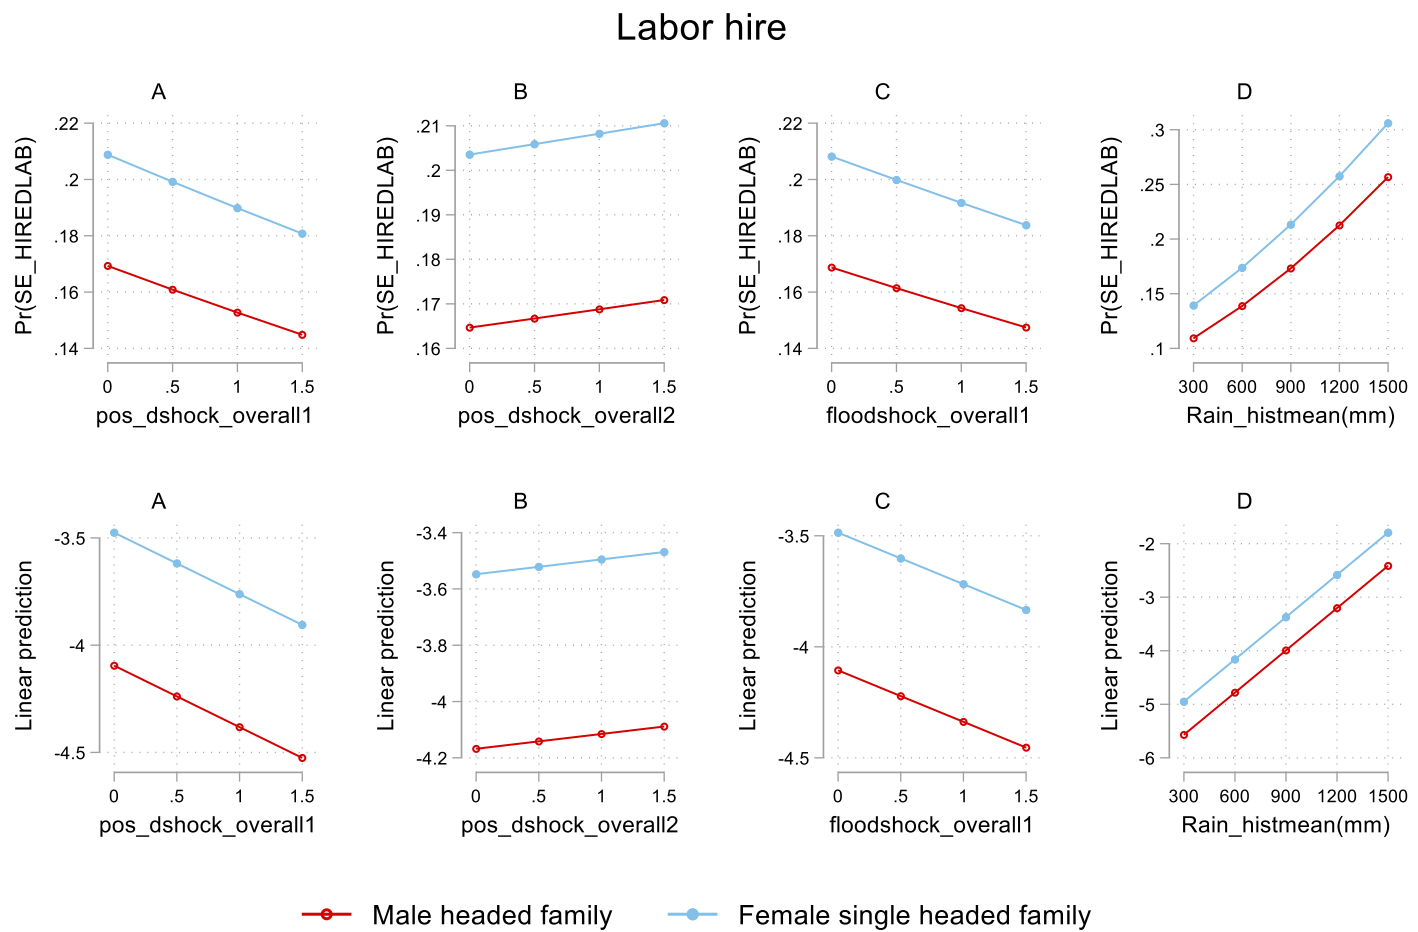

Figure S25: Plotting marginal effects of changes in 1-year lag drought shocks(pos\_dshock\_overall1), 2-year lag drought shock(pos\_dshock\_overall2), 1-year lag flood shock(floodshock\_overall1), and historical mean rainfall(Rain\_histmean(mm)) on the probability (top panel), and intensity of input purchase (bottom panel) by gender.

Do rainfall shocks prompt commercial input purchase amongst smallholder farmers in diverse regions and environments in Malawi? Lessons for adaptation

- Female-headed vs. Male headed

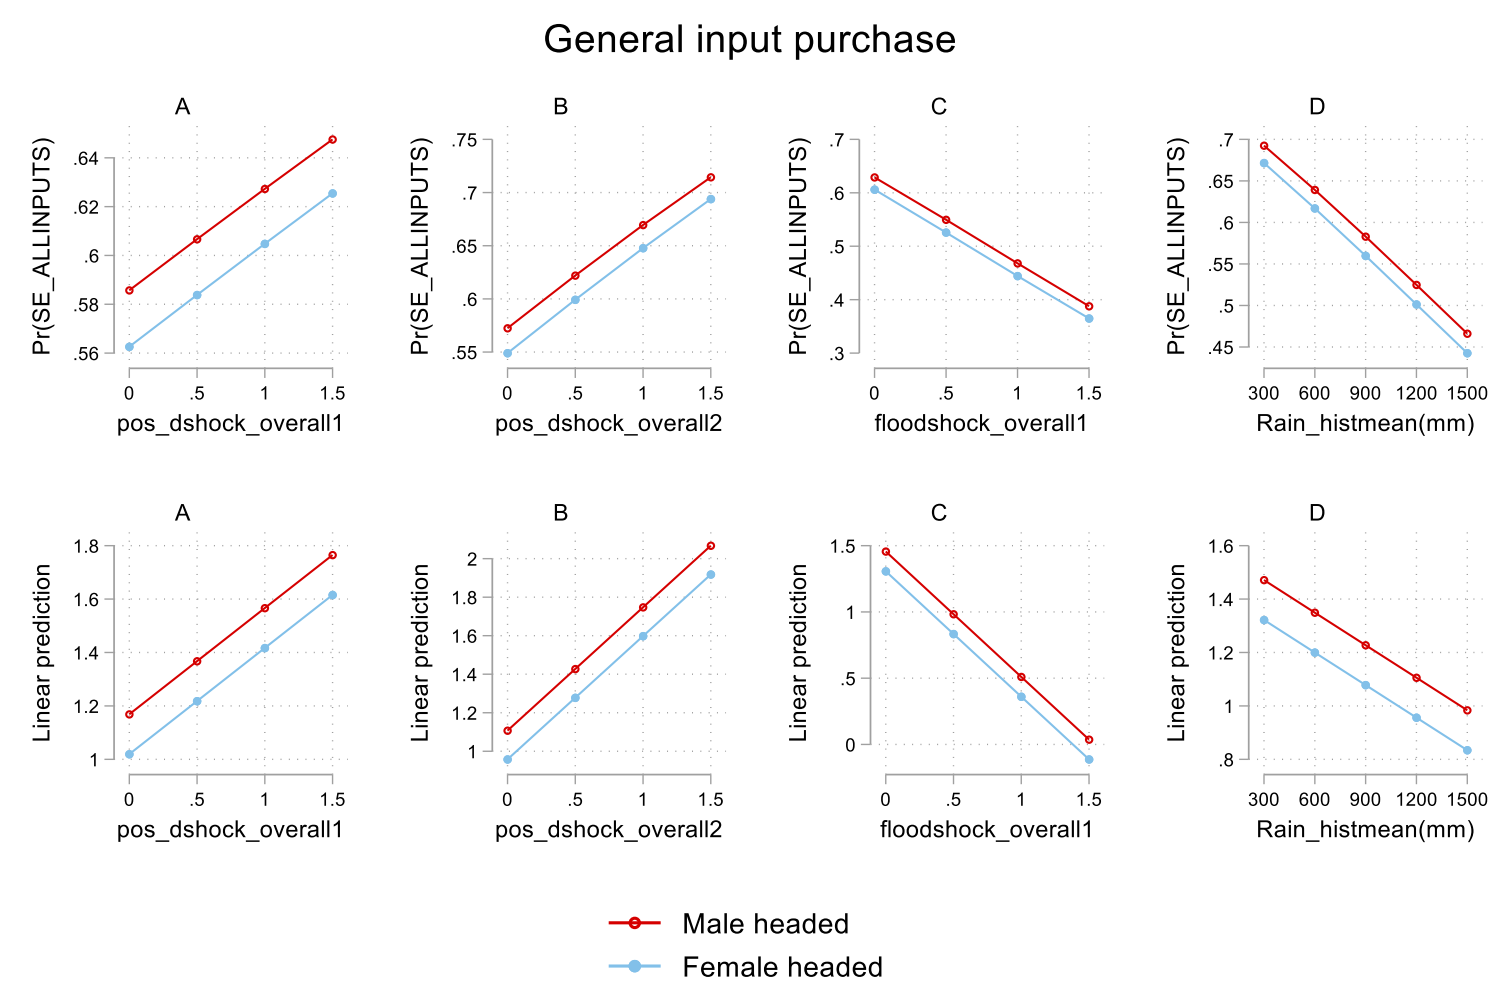

Figure S26: Plotting marginal effects of changes in 1-year lag drought shocks(pos\_dshock\_overall1), 2-year lag drought shock(pos\_dshock\_overall2), 1-year lag flood shock(floodshock\_overall1), and historical mean rainfall(Rain\_histmean(mm)) on the probability (top panel), and intensity of input purchase (bottom panel) by gender.

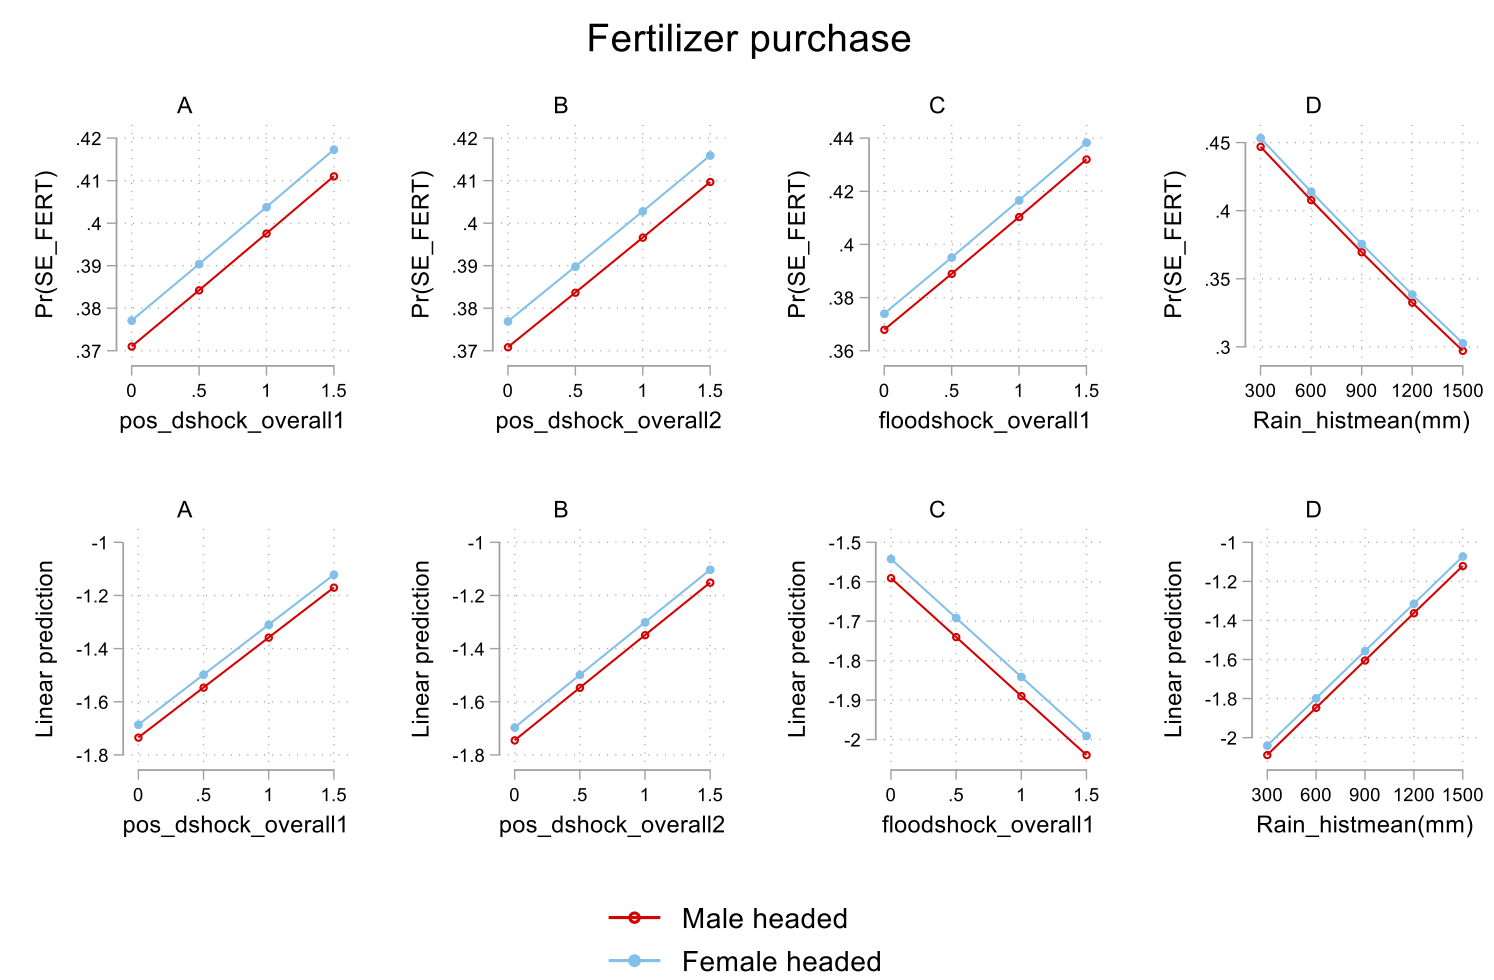

Figure S27: Plotting marginal effects of changes in 1-year lag drought shocks(pos\_dshock\_overall1), 2-year lag drought shock(pos\_dshock\_overall2), 1-year lag flood shock(floodshock\_overall1), and historical mean rainfall(Rain\_histmean(mm)) on the probability (top panel), and intensity of input purchase (bottom panel) by gender.



Do rainfall shocks prompt commercial input purchase amongst smallholder farmers in diverse regions and environments in Malawi? Lessons for adaptation

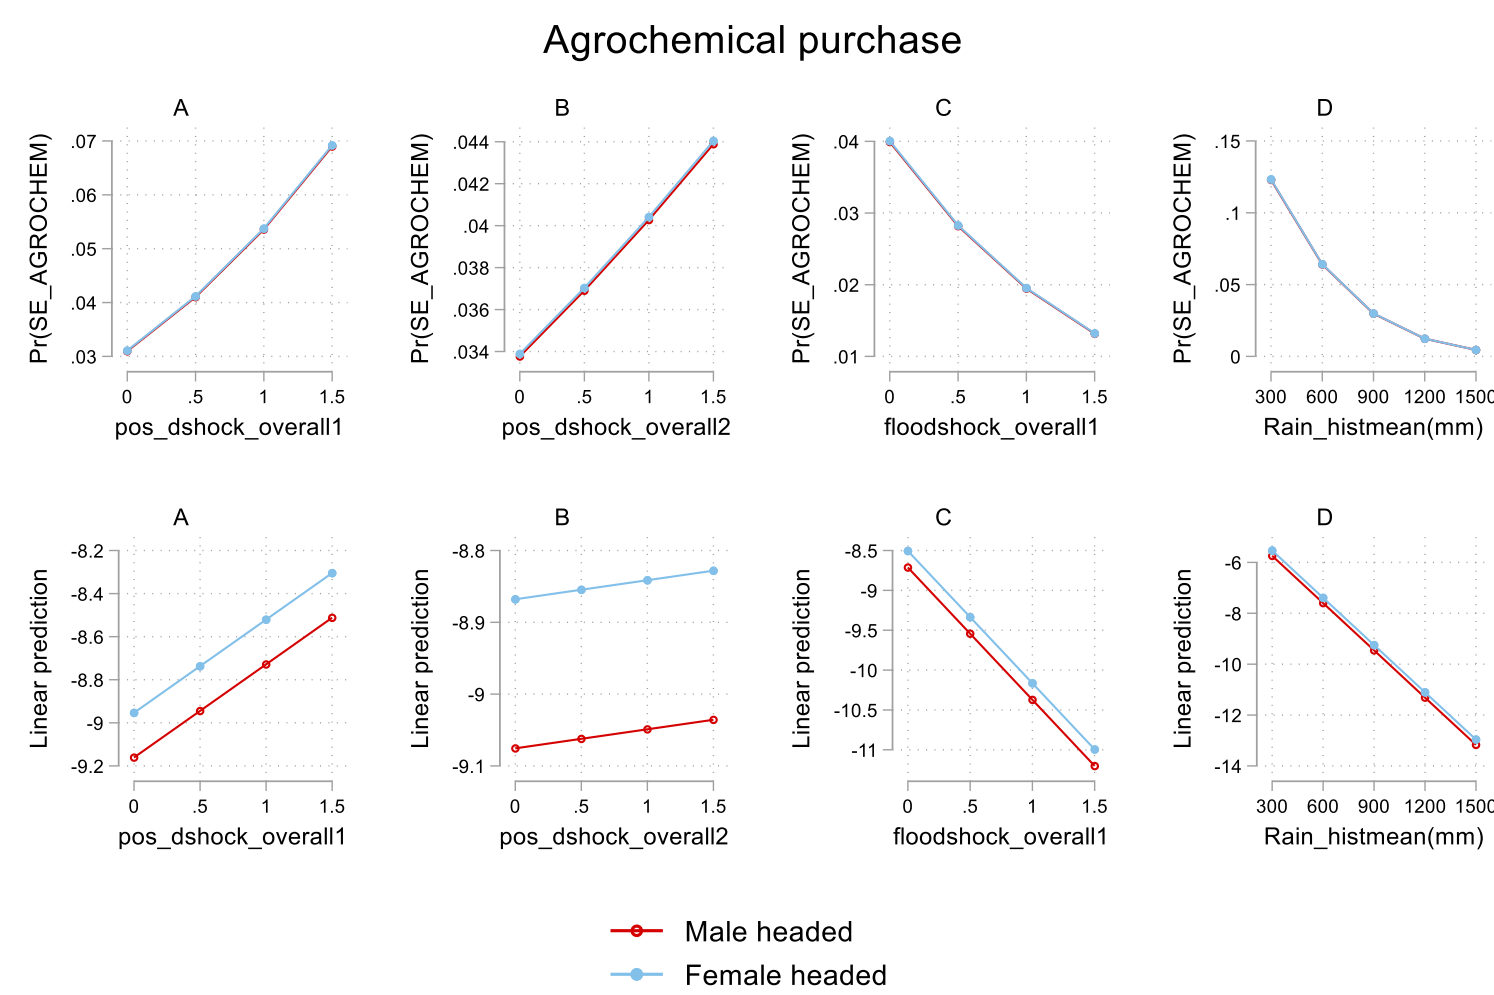

Figure S28: Plotting marginal effects of changes in 1-year lag drought shocks( $\text{pos\_dshock\_overall1}$ ), 2-year lag drought shock( $\text{pos\_dshock\_overall2}$ ), 1-year lag flood shock( $\text{floodshock\_overall1}$ ), and historical mean rainfall( $\text{Rain\_histmean(mm)}$ ) on the probability (top panel), and intensity of input purchase (bottom panel) by gender.

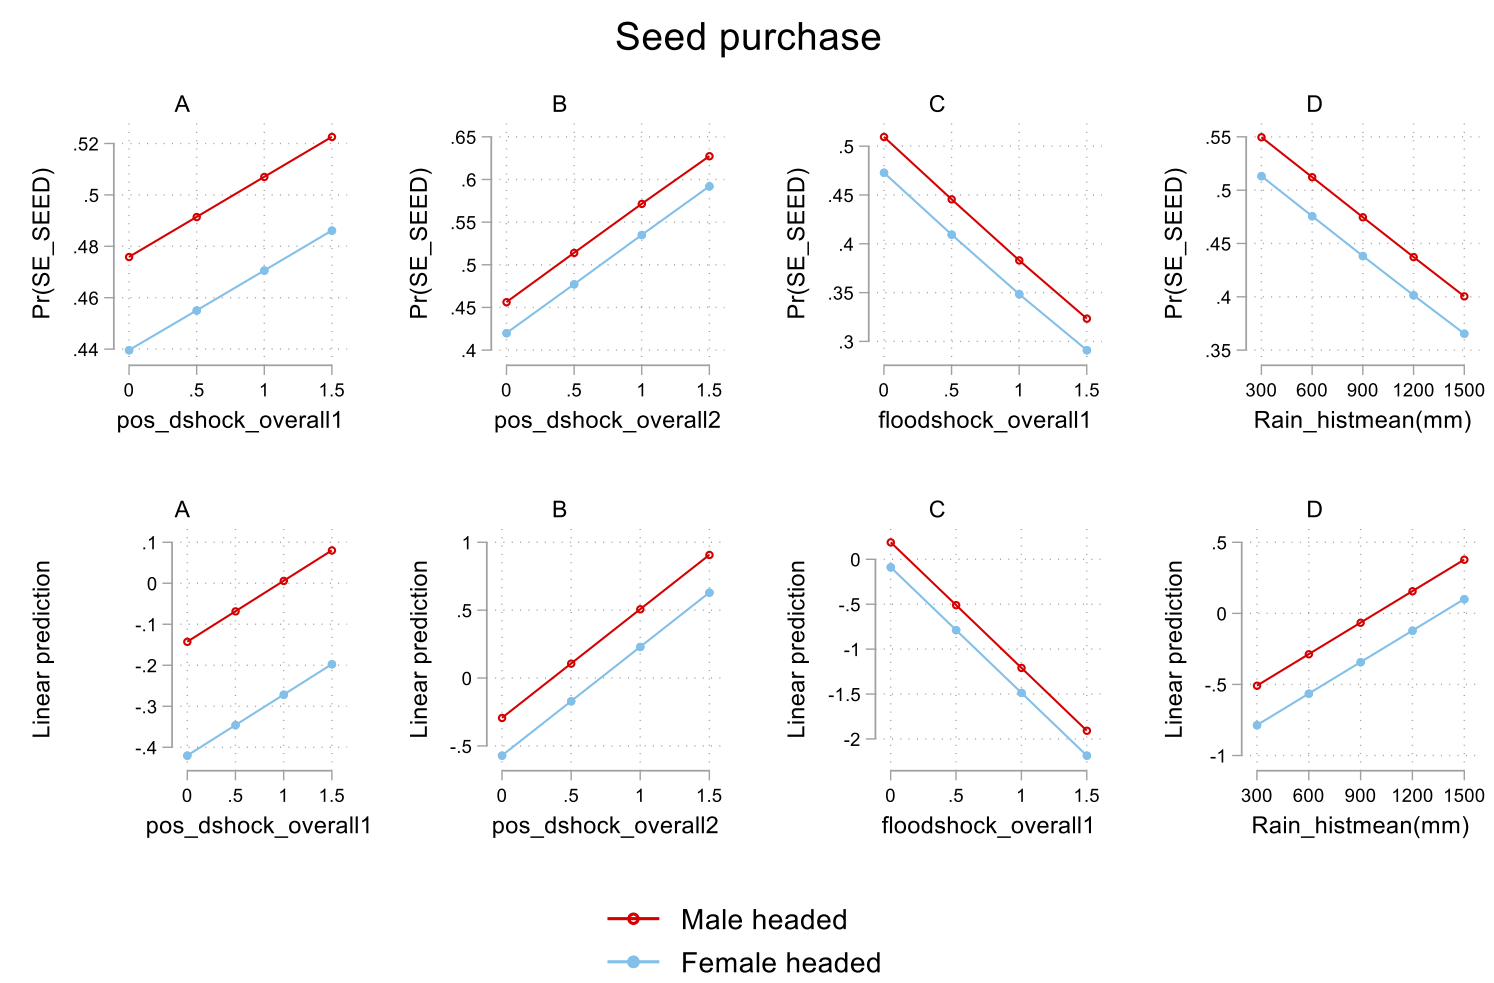

Figure S29: Plotting marginal effects of changes in 1-year lag drought shocks( $\text{pos\_dshock\_overall1}$ ), 2-year lag drought shock( $\text{pos\_dshock\_overall2}$ ), 1-year lag flood shock( $\text{floodshock\_overall1}$ ), and historical mean rainfall( $\text{Rain\_histmean(mm)}$ ) on the probability (top panel), and intensity of input purchase (bottom panel) by gender.

Do rainfall shocks prompt commercial input purchase amongst smallholder farmers in diverse regions and environments in Malawi? Lessons for adaptation

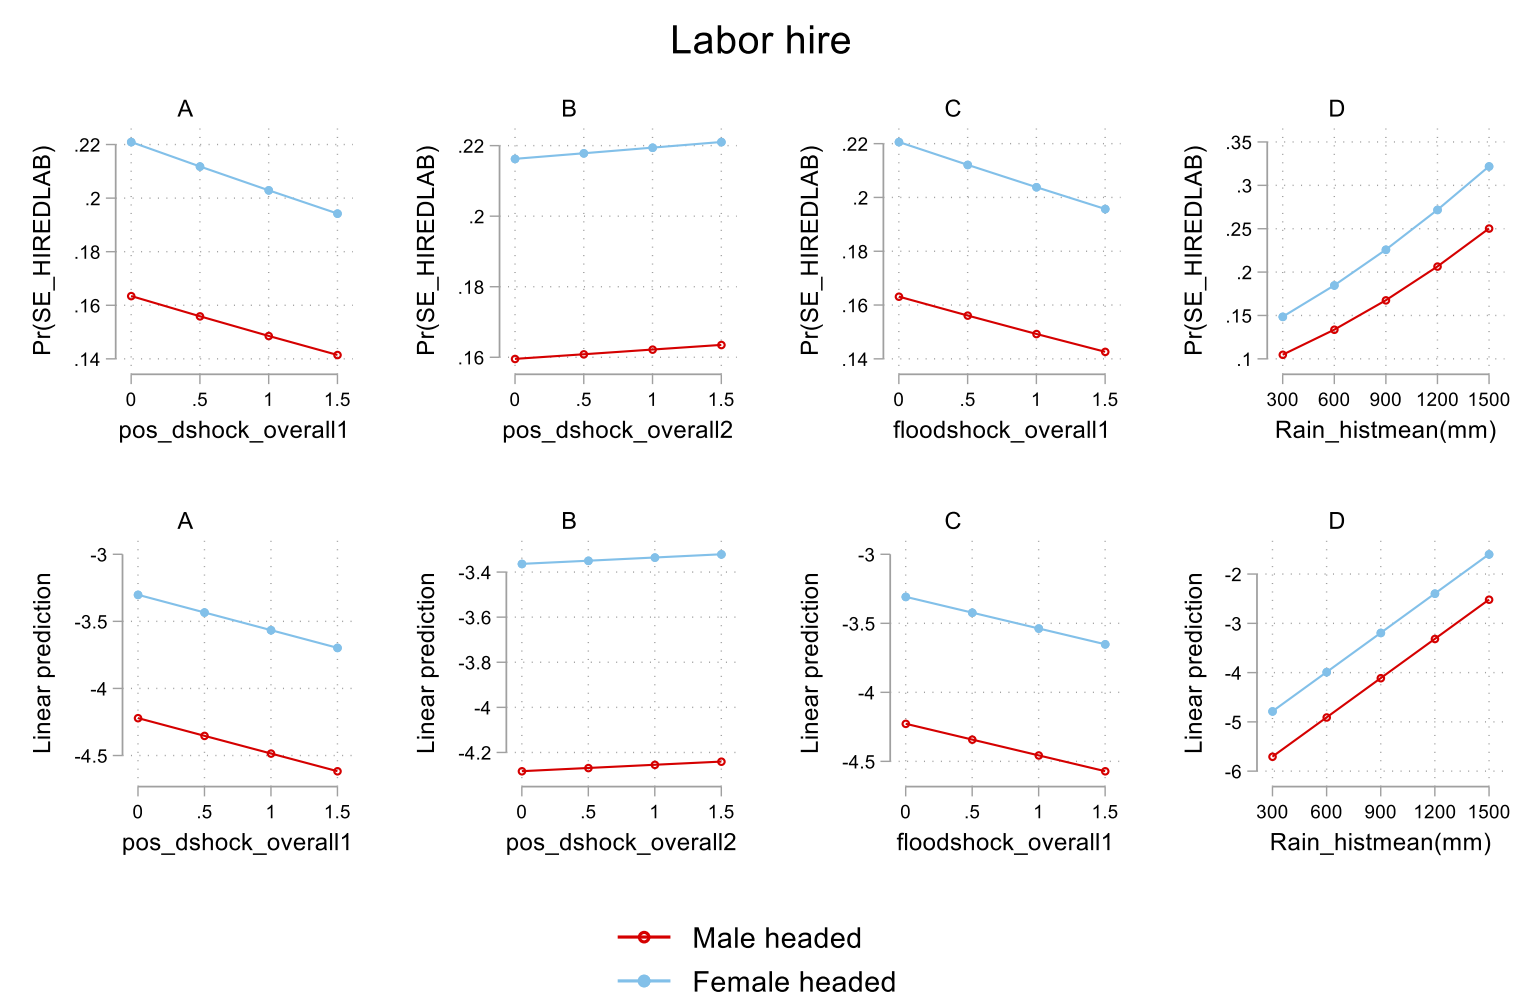

Figure S30: Plotting marginal effects of changes in 1-year lag drought shocks( $pos\_dshock\_overall1$ ), 2-year lag drought shock( $pos\_dshock\_overall2$ ), 1-year lag flood shock( $floodshock\_overall1$ ), and historical mean rainfall( $Rain\_histmean(mm)$ ) on the probability (top panel), and intensity of input purchase (bottom panel) by gender.

Do rainfall shocks prompt commercial input purchase amongst smallholder farmers in diverse regions and environments in Malawi? Lessons for adaptation

✖ Examining the role of shocks in shaping the demand for purchased inputs using shock perception data

Figure on perceptions (drought and flood shock exposure)

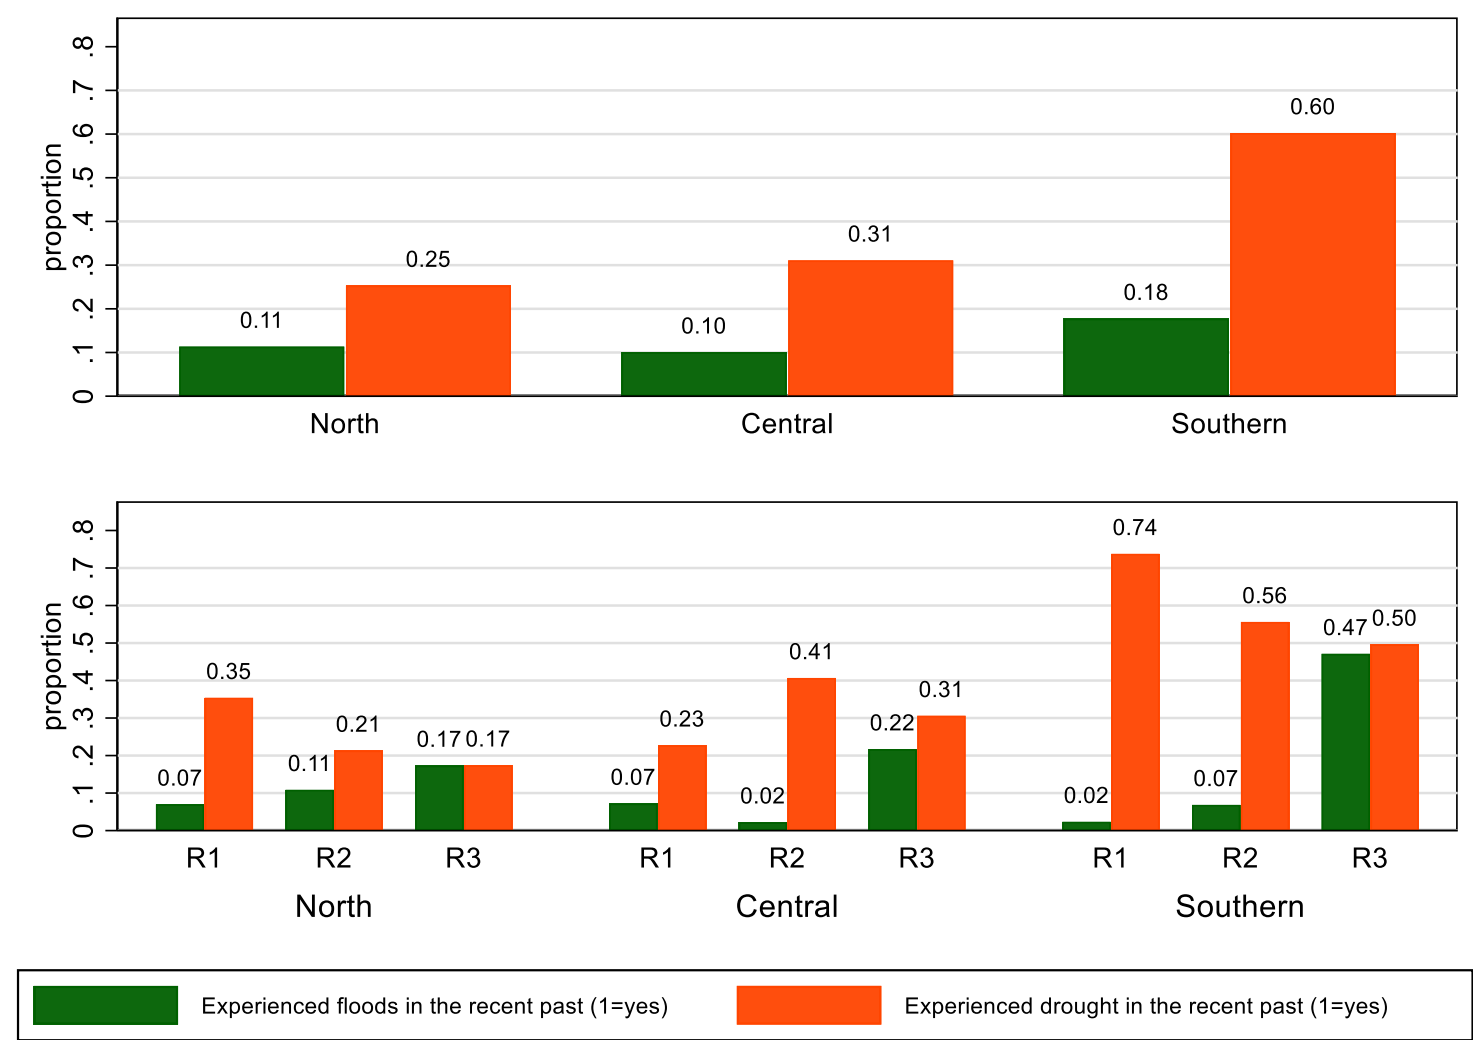

Figure S31: Household perceptions on drought and flood shock exposure in the recent past by survey region (North, Central, and Southern regions) and survey round(IHS3, IHS4, and IHS5)

Impact of climate perceptions on input purchases?

Table S21: Influence of drought and flood shock exposure perceptions on input purchase across

| regions<br>VARIABLES                          | National              |                       | Northern             |                      | Central               |                       | Southern             |                       |
|-----------------------------------------------|-----------------------|-----------------------|----------------------|----------------------|-----------------------|-----------------------|----------------------|-----------------------|
|                                               | Hurdle1               | Hurdle2               | Hurdle1              | Hurdle2              | Hurdle1               | Hurdle2               | Hurdle1              | Hurdle2               |
| Climate risk variables                        | ME(se)                | ME(se)                | ME(se)               | ME(se)               | ME(se)                | ME(se)                | ME(se)               | ME(se)                |
| Input purchasing in general                   |                       |                       |                      |                      |                       |                       |                      |                       |
| Experienced drought in the recent past(1=yes) | 0.020***<br>(0.0077)  | -0.156***<br>(0.0229) | 0.045**<br>(0.0215)  | -0.118*<br>(0.0646)  | -0.021*<br>(0.0124)   | -0.168***<br>(0.0388) | 0.039***<br>(0.0105) | -0.122***<br>(0.0310) |
| Experienced floods in the recent past(1=yes)  | 0.030***<br>(0.0113)  | -0.120***<br>(0.0309) | -0.011<br>(0.0294)   | -0.092<br>(0.0862)   | 0.019<br>(0.0204)     | -0.269***<br>(0.0550) | 0.036**<br>(0.0156)  | -0.095**<br>(0.0420)  |
| Observations                                  | 25631                 | 15058                 | 4123                 | 2019                 | 9001                  | 5484                  | 12507                | 7555                  |
| Fertilizer                                    |                       |                       |                      |                      |                       |                       |                      |                       |
| Experienced drought in the recent past(1=yes) | -0.024***<br>(0.0066) | -0.078***<br>(0.0204) | 0.014<br>(0.0184)    | 0.013<br>(0.0505)    | -0.056***<br>(0.0119) | -0.083***<br>(0.0319) | -0.004<br>(0.0084)   | -0.100***<br>(0.0311) |
| Experienced floods in the recent past(1=yes)  | -0.017*<br>(0.0098)   | -0.058*<br>(0.0295)   | -0.032<br>(0.0268)   | 0.010<br>(0.0679)    | -0.051***<br>(0.0182) | -0.122***<br>(0.0444) | -0.028**<br>(0.0124) | -0.024<br>(0.0458)    |
| Observations                                  | 25631                 | 8796                  | 4123                 | 1508                 | 9001                  | 3923                  | 12507                | 3365                  |
| Agrochemicals                                 |                       |                       |                      |                      |                       |                       |                      |                       |
| Experienced drought in the recent past(1=yes) | 0.007***<br>(0.0025)  | -0.028<br>(0.0589)    | -0.005<br>(0.0061)   | -0.111<br>(0.1693)   | -0.003<br>(0.0038)    | -0.089<br>(0.1038)    | 0.017***<br>(0.0042) | 0.022<br>(0.0846)     |
| Experienced floods in the recent past(1=yes)  | 0.002<br>(0.0033)     | 0.019<br>(0.0690)     | 0.011<br>(0.0081)    | 0.128<br>(0.1454)    | -0.005<br>(0.0052)    | -0.114<br>(0.1600)    | 0.008*<br>(0.0048)   | 0.072<br>(0.0922)     |
| Observations                                  | 25585                 | 906                   | 4077                 | 138                  | 9001                  | 290                   | 12507                | 478                   |
| Seed                                          |                       |                       |                      |                      |                       |                       |                      |                       |
| Experienced drought in the recent past(1=yes) | 0.055***<br>(0.0073)  | 0.027<br>(0.0183)     | 0.061***<br>(0.0182) | 0.095*<br>(0.0571)   | 0.027**<br>(0.0120)   | -0.013<br>(0.0330)    | 0.068***<br>(0.0107) | 0.038<br>(0.0241)     |
| Experienced floods in the recent past(1=yes)  | 0.057***<br>(0.0107)  | -0.003<br>(0.0272)    | 0.005<br>(0.0282)    | -0.006<br>(0.0945)   | 0.059***<br>(0.0184)  | 0.044<br>(0.0555)     | 0.071***<br>(0.0155) | -0.022<br>(0.0336)    |
| Observations                                  | 25631                 | 11171                 | 4123                 | 1309                 | 9001                  | 3680                  | 12507                | 6182                  |
| Hired labor                                   |                       |                       |                      |                      |                       |                       |                      |                       |
| Experienced drought in the recent past(1=yes) | -0.009*<br>(0.0050)   | -0.028<br>(0.0311)    | -0.004<br>(0.0145)   | 0.141<br>(0.0876)    | -0.019**<br>(0.0089)  | -0.111**<br>(0.0517)  | 0.002<br>(0.0068)    | 0.026<br>(0.0435)     |
| Experienced floods in the recent past(1=yes)  | -0.004<br>(0.0078)    | -0.140***<br>(0.0480) | -0.001<br>(0.0212)   | -0.269**<br>(0.1161) | -0.015<br>(0.0152)    | 0.026<br>(0.0977)     | -0.007<br>(0.0101)   | -0.221***<br>(0.0610) |
| Observations                                  | 25631                 | 4433                  | 4123                 | 706                  | 9001                  | 1678                  | 12507                | 2049                  |

Standard errors in parentheses\*  $p < 0.10$ , \*\*  $p < 0.05$ , \*\*\*  $p < 0.01$ ; ME=Marginal Effects. Hurdle 1 is a probit regression for the probability of input purchase whilst Hurdle 2 is the model for intensity of purchase for purchasers (log value of purchased input (USD/ha); \*  $p < 0.10$ , \*\*  $p < 0.05$ , \*\*\*  $p < 0.01$ . Control variables included in all specifications include Number of plots cultivated; Log farm size(ha); Household asset wealth index; Agricultural implement access score; Log Distance to ADMARC (km); Received fertilizer coupon(1=yes); Received seed coupon(1=yes); Age of household head(years); Household head attained at least JCE (1=yes); Male household head(1=yes); Household Size; Household dependency ratio (%); Survey year dummies; District fixed effects.
